# Supplementary material for: Growth of Soot Volume Fraction and Aggregate Size in 1D Premixed C2H4/Air Flames Studied by Laser-Induced Incandescence and Angle-Dependent Light Scattering
Source: Hindawi journal article supplement (doi:10.1155/2018/2308419), 2018-10-01
Supplement: f1 [file 2308419.f1.pdf]

Experimental results: fv and Rg vs HAB (1)

| v (cm/s)<br>HAB (mm) |          | φ = 2.0  |         |          |         |          |         |          |         |          |         |          |         |          |         |          |         |          |         |          |         |          |         |          |         |          |         |          |         |          |         |
|----------------------|----------|----------|---------|----------|---------|----------|---------|----------|---------|----------|---------|----------|---------|----------|---------|----------|---------|----------|---------|----------|---------|----------|---------|----------|---------|----------|---------|----------|---------|----------|---------|
|                      |          | 5.31     |         | 5.89     |         | 6.48     |         | 7.07     |         | 7.66     |         | 8.25     |         | 8.84     |         | 9.43     |         | 10.02    |         | 10.61    |         | 11.20    |         | 11.79    |         | 12.38    |         | 12.97    |         | 13.56    |         |
|                      |          | fv (ppm) | Rg (nm) |
| 2                    | 0.000745 |          |         | 0.000704 |         | 0.000735 |         | 0.000742 |         | 0.000713 |         | 0.000717 |         | 0.000682 |         | 0.000734 |         | 0.000715 |         | 0.00072  |         | 0.000762 |         | 0.000761 |         | 0.000796 |         | 0.000708 |         | 0.00074  |         |
| 3                    | 0.00077  |          |         | 0.000809 |         | 0.000734 |         | 0.000724 |         | 0.000725 |         | 0.000721 |         | 0.00077  |         | 0.00078  |         | 0.000739 |         | 0.000733 |         | 0.000697 |         | 0.000715 |         | 0.000696 |         | 0.000729 |         | 0.000732 |         |
| 4                    | 0.000697 |          |         | 0.000776 |         | 0.000731 |         | 0.000786 |         | 0.000805 |         | 0.000771 |         | 0.00075  |         | 0.000726 |         | 0.000743 |         | 0.000773 |         | 0.000798 |         | 0.000766 |         | 0.000748 |         | 0.000749 |         | 0.000832 |         |
| 5                    | 0.000747 |          |         | 0.000848 |         | 0.000877 |         | 0.000795 |         | 0.000791 |         | 0.000811 |         | 0.000841 |         | 0.000781 |         | 0.000809 |         | 0.000839 |         | 0.000766 |         | 0.000757 |         | 0.000763 |         | 0.000762 |         | 0.00076  |         |
| 6                    | 0.000802 |          |         | 0.00087  |         | 0.000881 |         | 0.000872 |         | 0.00093  |         | 0.00093  |         | 0.001027 |         | 0.000848 |         | 0.000878 |         | 0.000879 |         | 0.000837 |         | 0.00079  |         | 0.000745 |         | 0.000791 |         | 0.000748 |         |
| 7                    | 0.000878 |          |         | 0.001005 |         | 0.001085 |         | 0.001015 |         | 0.001025 |         | 0.001092 |         | 0.001371 |         | 0.001158 |         | 0.000928 |         | 0.001066 |         | 0.000967 |         | 0.000826 |         | 0.000811 |         | 0.000793 |         | 0.000793 |         |
| 8                    | 0.001028 |          |         | 0.001284 |         | 0.001364 |         | 0.001279 |         | 0.001389 |         | 0.001501 |         | 0.00232  |         | 0.001521 |         | 0.001166 |         | 0.001333 |         | 0.001091 |         | 0.000868 |         | 0.00081  |         | 0.000834 |         | 0.000785 |         |
| 9                    | 0.001003 |          |         | 0.001886 |         | 0.001834 |         | 0.001964 |         | 0.002081 |         | 0.002202 |         | 0.003123 |         | 0.00237  |         | 0.001302 |         | 0.001874 |         | 0.001365 |         | 0.000963 |         | 0.00093  |         | 0.000874 |         | 0.000855 |         |
| 10                   | 0.001198 |          |         | 0.002977 |         | 0.003017 |         | 0.003459 |         | 0.003015 |         | 0.003492 |         | 0.004513 |         | 0.003532 |         | 0.001908 |         | 0.002563 |         | 0.001775 |         | 0.001    |         | 0.001059 |         | 0.000903 |         | 0.000873 |         |
| 11                   | 0.001494 |          |         | 0.004305 |         | 0.004715 |         | 0.00462  |         | 0.004496 |         | 0.004768 |         | 0.00579  |         | 0.003987 |         | 0.002706 |         | 0.00296  |         | 0.002124 |         | 0.001138 |         | 0.00103  |         | 0.000914 |         | 0.000899 |         |
| 12                   | 0.001978 |          |         | 0.005908 |         | 0.005841 |         | 0.006625 |         | 0.0064   |         | 0.006166 |         | 0.006499 |         | 0.004715 |         | 0.002844 |         | 0.003046 |         | 0.00275  |         | 0.00115  |         | 0.001086 |         | 0.001013 |         | 0.000923 |         |
| 13                   | 0.002745 |          |         | 0.008305 |         | 0.007456 |         | 0.008058 |         | 0.006928 |         | 0.007443 |         | 0.007398 |         | 0.005457 |         | 0.003264 |         | 0.003178 |         | 0.002911 |         | 0.001165 |         | 0.001111 |         | 0.001    |         | 0.000999 |         |
| 14                   | 0.003276 |          |         | 0.010075 |         | 0.009515 |         | 0.009101 |         | 0.0092   |         | 0.00796  |         | 0.008495 |         | 0.005992 |         | 0.003662 |         | 0.003548 |         | 0.003078 |         | 0.001367 |         | 0.001331 |         | 0.001046 |         | 0.001057 |         |
| 15                   | 0.004274 |          |         | 0.011586 |         | 0.011762 |         | 0.011983 |         | 0.009509 |         | 0.008363 |         | 0.008247 |         | 0.006403 |         | 0.004613 |         | 0.003742 |         | 0.003026 |         | 0.00147  |         | 0.001239 |         | 0.001    |         | 0.001002 |         |
| 16                   | 0.005366 |          |         | 0.014983 |         | 0.014562 |         | 0.013097 |         | 0.010829 |         | 0.009409 |         | 0.009272 |         | 0.007464 |         | 0.004741 |         | 0.003798 |         | 0.003256 |         | 0.001564 |         | 0.00136  |         | 0.001096 |         | 0.001037 |         |
| 17                   | 0.005738 |          |         | 0.016505 |         | 0.016394 |         | 0.013144 |         | 0.011749 |         | 0.01022  |         | 0.01012  |         | 0.007537 |         | 0.004593 |         | 0.004033 |         | 0.00337  |         | 0.001707 |         | 0.001392 |         | 0.001185 |         | 0.001023 |         |
| 18                   | 0.005754 |          |         | 0.019239 |         | 0.018888 |         | 0.016537 |         | 0.01156  |         | 0.011323 |         | 0.010479 |         | 0.007869 |         | 0.005264 |         | 0.003925 |         | 0.003629 |         | 0.001809 |         | 0.001393 |         | 0.001199 |         | 0.000975 |         |
| 19                   | 0.008172 |          |         | 0.019915 |         | 0.020548 |         | 0.014905 |         | 0.013461 |         | 0.012343 |         | 0.010637 |         | 0.008863 |         | 0.005302 |         | 0.004109 |         | 0.00353  |         | 0.001961 |         | 0.001516 |         | 0.001166 |         | 0.001079 |         |
| 20                   | 0.009212 |          |         | 0.022422 |         | 0.020917 |         | 0.016589 |         | 0.014363 |         | 0.013764 |         | 0.010723 |         | 0.008927 |         | 0.005482 |         | 0.004327 |         | 0.00368  |         | 0.001851 |         | 0.001592 |         | 0.001237 |         | 0.000969 |         |
| 22                   | 0.01041  |          |         | 0.025263 |         | 0.024237 |         | 0.018689 |         | 0.01501  |         | 0.013816 |         | 0.012307 |         | 0.008622 |         | 0.006012 |         | 0.004302 |         | 0.003694 |         | 0.00188  |         | 0.001485 |         | 0.001238 |         | 0.001043 |         |
| 25                   | 0.012415 |          |         | 0.031136 |         | 0.029377 |         | 0.019505 |         | 0.017962 |         | 0.015867 |         | 0.013769 |         | 0.009389 |         | 0.00612  |         | 0.004569 |         | 0.003881 |         | 0.001805 |         | 0.00168  |         | 0.001427 |         | 0.00099  |         |
| 30                   | 0.014148 |          |         | 0.037545 |         | 0.037046 |         | 0.024795 |         | 0.018659 |         | 0.017593 |         | 0.015501 |         | 0.009602 |         | 0.00617  |         | 0.004712 |         | 0.004036 |         | 0.0021   |         | 0.001617 |         | 0.001405 |         | 0.001066 |         |

| v (cm/s)<br>HAB (mm) |          | φ = 2.1  |         |          |         |          |          |          |          |          |          |          |          |          |          |          |          |          |          |          |          |          |          |          |          |          |          |          |          |          |         |
|----------------------|----------|----------|---------|----------|---------|----------|----------|----------|----------|----------|----------|----------|----------|----------|----------|----------|----------|----------|----------|----------|----------|----------|----------|----------|----------|----------|----------|----------|----------|----------|---------|
|                      |          | 5.31     |         | 5.89     |         | 6.48     |          | 7.07     |          | 7.66     |          | 8.25     |          | 8.84     |          | 9.43     |          | 10.02    |          | 10.61    |          | 11.20    |          | 11.79    |          | 12.38    |          | 12.97    |          | 13.56    |         |
|                      |          | fv (ppm) | Rg (nm) | fv (ppm) | Rg (nm) | fv (ppm) | Rg (nm)  | fv (ppm) | Rg (nm)  | fv (ppm) | Rg (nm)  | fv (ppm) | Rg (nm)  | fv (ppm) | Rg (nm)  | fv (ppm) | Rg (nm)  | fv (ppm) | Rg (nm)  | fv (ppm) | Rg (nm)  | fv (ppm) | Rg (nm)  | fv (ppm) | Rg (nm)  | fv (ppm) | Rg (nm)  | fv (ppm) | Rg (nm)  | fv (ppm) | Rg (nm) |
| 2                    | 0.00066  |          |         | 0.000571 |         | 0.000577 |          | 0.000652 |          | 0.000623 |          | 0.000635 |          | 0.000669 |          | 0.000628 |          | 0.00065  |          | 0.000667 |          | 0.000665 |          | 0.000687 |          | 0.000722 |          | 0.000708 |          | 0.000668 |         |
| 3                    | 0.000642 |          |         | 0.000646 |         | 0.000623 |          | 0.000653 |          | 0.000733 |          | 0.000687 |          | 0.000687 |          | 0.000722 |          | 0.000806 |          | 0.000699 |          | 0.000726 |          | 0.000705 |          | 0.000648 |          | 0.000719 |          | 0.00071  |         |
| 4                    | 0.000725 |          |         | 0.000768 |         | 0.000757 |          | 0.000906 |          | 0.000847 |          | 0.000908 |          | 0.000947 |          | 0.001103 |          | 0.000983 |          | 0.000979 |          | 0.000962 |          | 0.000848 |          | 0.000839 |          | 0.000649 |          | 0.000693 |         |
| 5                    | 0.000859 |          |         | 0.001036 |         | 0.001219 |          | 0.001129 |          | 0.001334 |          | 0.00135  |          | 0.001482 |          | 0.001633 |          | 0.001514 |          | 0.001291 |          | 0.00145  |          | 0.001146 |          | 0.000952 |          | 0.000812 |          | 0.000656 |         |
| 6                    | 0.00116  |          |         | 0.00145  |         | 0.001735 |          | 0.002411 |          | 0.00251  |          | 0.00259  |          | 0.002931 |          | 0.003849 |          | 0.003563 |          | 0.002387 |          | 0.003101 |          | 0.001989 |          | 0.001528 |          | 0.000969 |          | 0.000767 |         |
| 7                    | 0.001617 |          |         | 0.002525 |         | 0.003334 |          | 0.003597 |          | 0.005176 |          | 0.005873 |          | 0.006147 |          | 0.008113 |          | 0.006533 |          | 0.004819 |          | 0.005701 |          | 0.003791 |          | 0.002527 |          | 0.001424 |          | 0.000936 |         |
| 8                    | 0.002398 |          |         | 0.004198 |         | 0.006228 |          | 0.007324 |          | 0.008311 |          | 0.010088 |          | 0.010332 |          | 0.012553 |          | 0.009778 |          | 0.007482 |          | 0.007346 |          | 0.00501  |          | 0.003992 |          | 0.002063 |          | 0.001265 |         |
| 9                    | 0.003261 |          |         | 0.007365 |         | 0.010515 |          | 0.010621 |          | 0.014335 |          | 0.015124 |          | 0.014342 |          | 0.016882 |          | 0.012579 |          | 0.008566 |          | 0.009887 |          | 0.006776 |          | 0.005081 |          | 0.002869 |          | 0.001781 |         |
| 10                   | 0.005186 |          |         | 0.011482 |         | 0.016387 |          | 0.01557  |          | 0.018954 |          | 0.018893 |          | 0.018027 |          | 0.021292 |          | 0.016541 |          | 0.010482 |          | 0.010903 | 9.583516 | 0.007283 |          | 0.006507 |          | 0.003478 |          | 0.002716 |         |
| 11                   | 0.006771 |          |         | 0.017901 |         | 0.023934 |          | 0.024464 |          | 0.026142 |          | 0.023967 |          | 0.021019 |          | 0.026225 |          | 0.01795  |          | 0.01217  |          | 0.012245 |          | 0.00844  |          | 0.006898 |          | 0.004114 |          | 0.004004 |         |
| 12                   | 0.010323 |          |         | 0.023928 |         | 0.028002 |          | 0.029236 |          | 0.03204  |          | 0.028902 |          | 0.024458 |          | 0.029408 | 12.11093 | 0.020596 |          | 0.013883 | 10.75081 | 0.013321 | 13.66548 | 0.0088   | 16.33004 | 0.00755  | 16.96355 | 0.004852 | 0.005026 |          |         |
| 13                   | 0.014431 |          |         | 0.030865 |         | 0.03549  |          | 0.0349   |          | 0.037996 |          | 0.033741 |          | 0.02785  |          | 0.031366 |          | 0.023582 |          | 0.014887 |          | 0.014519 |          | 0.009404 |          | 0.008005 |          | 0.005152 |          | 0.006044 |         |
| 14                   | 0.017813 |          |         | 0.038641 |         | 0.042419 |          | 0.041843 |          | 0.044835 | 16.4042  | 0.035737 |          | 0.031849 | 14.08476 | 0.033342 | 11.43932 | 0.024727 | 14.7568  | 0.015542 | 13.25056 | 0.015325 |          | 0.010244 | 14.05498 | 0.009157 | 12.92932 | 0.005325 | 0.007651 |          |         |
| 15                   | 0.022588 |          |         | 0.049987 |         | 0.051637 |          | 0.047057 |          | 0.046919 |          | 0.039786 |          | 0.035551 |          | 0.0359   |          | 0.025817 |          | 0.01762  |          | 0.015931 |          | 0.010506 |          | 0.009618 |          | 0.006186 |          | 0.009113 |         |
| 16                   | 0.02675  |          |         | 0.055299 |         | 0.055399 | 14.81726 | 0.055425 | 10.00056 | 0.051284 | 15.15429 | 0.042305 | 14.20372 | 0.038471 | 16.84993 | 0.036391 | 15.56166 | 0.027043 | 16.87225 | 0.018149 | 15.59873 | 0.016404 | 15.39896 | 0.01073  | 0.010011 |          | 0.006758 |          | 0.010984 |          |         |
| 17                   | 0.030761 |          |         | 0.062766 |         | 0.061035 |          | 0.061379 |          | 0.05393  |          | 0.045885 |          | 0        |          |          |          |          |          |          |          |          |          |          |          |          |          |          |          |          |         |

Experimental results: fv and Rg vs HAB (2)

|          | φ = 2.2  |          |          |          |          |          |          |          |          |          |          |          |          |          |          |          |          |          |          |          |          |          |          |          |          |         |
|----------|----------|----------|----------|----------|----------|----------|----------|----------|----------|----------|----------|----------|----------|----------|----------|----------|----------|----------|----------|----------|----------|----------|----------|----------|----------|---------|
| v (cm/s) | 5.31     |          | 5.89     |          | 6.19     |          | 6.48     |          | 7.07     |          | 7.66     |          | 8.25     |          | 8.84     |          | 9.43     |          | 10.02    |          | 10.61    |          | 11.20    |          | 11.79    |         |
| HAB (nm) | fv (ppm) | Rg (nm)  | fv (ppm) | Rg (nm)  | fv (ppm) | Rg (nm)  | fv (ppm) | Rg (nm)  | fv (ppm) | Rg (nm)  | fv (ppm) | Rg (nm)  | fv (ppm) | Rg (nm)  | fv (ppm) | Rg (nm)  | fv (ppm) | Rg (nm)  | fv (ppm) | Rg (nm)  | fv (ppm) | Rg (nm)  | fv (ppm) | Rg (nm)  | fv (ppm) | Rg (nm) |
| 2        | 0.00055  |          | 0.000527 |          | 0.00053  |          | 0.000575 |          | 0.00059  |          | 0.000607 |          | 0.000565 |          | 0.000617 |          | 0.00066  |          | 0.000571 |          | 0.000521 |          | 0.000541 |          | 0.00051  |         |
| 3        | 0.000539 |          | 0.000581 |          | 0.000617 |          | 0.000662 |          | 0.000688 |          | 0.000737 |          | 0.000674 |          | 0.000797 |          | 0.000799 |          | 0.00078  |          | 0.000546 |          | 0.000612 |          | 0.000561 |         |
| 4        | 0.000727 |          | 0.000814 |          | 0.000881 |          | 0.000906 |          | 0.000987 |          | 0.001141 |          | 0.001196 |          | 0.001289 |          | 0.001274 |          | 0.001274 |          | 0.000693 |          | 0.000613 |          | 0.000562 |         |
| 5        | 0.001004 |          | 0.001365 |          | 0.001421 |          | 0.001597 |          | 0.001877 |          | 0.002324 |          | 0.002618 |          | 0.002966 |          | 0.00341  |          | 0.003354 |          | 0.001172 |          | 0.001032 |          | 0.000549 |         |
| 6        | 0.001591 |          | 0.00235  |          | 0.002666 |          | 0.003168 |          | 0.004201 |          | 0.006381 |          | 0.00698  |          | 0.008644 |          | 0.010002 |          | 0.009122 |          | 0.003054 |          | 0.002179 |          | 0.000618 |         |
| 7        | 0.002494 |          | 0.004567 |          | 0.005691 |          | 0.006764 |          | 0.010035 |          | 0.014183 |          | 0.015589 |          | 0.017476 |          | 0.018556 |          | 0.016741 |          | 0.01048  |          | 0.005872 |          | 0.000602 |         |
| 8        | 0.004178 |          | 0.009209 |          | 0.011802 |          | 0.014746 |          | 0.019176 |          | 0.025106 |          | 0.027713 |          | 0.02869  |          | 0.029234 |          | 0.025019 |          | 0.020941 | 1.44E+01 | 0.010334 |          | 0.000802 |         |
| 9        | 0.007069 |          | 0.016524 |          | 0.02014  |          | 0.024987 |          | 0.032362 |          | 0.040705 |          | 0.041936 |          | 0.042751 |          | 0.038552 |          | 0.033169 |          | 0.029839 |          | 0.016726 |          | 0.001027 |         |
| 10       | 0.011955 |          | 0.026144 |          | 0.031789 |          | 0.034458 |          | 0.047771 |          | 0.056612 |          | 0.055254 |          | 0.051769 | 14.73929 | 0.047894 |          | 0.04329  | 15.66458 | 0.037782 | 16.46032 | 0.022159 |          | 0.003086 |         |
| 11       | 0.017986 |          | 0.039316 |          | 0.048799 |          | 0.048822 |          | 0.065198 |          | 0.073485 |          | 0.068208 |          | 0.064525 |          | 0.05595  |          | 0.048403 |          | 0.045514 |          | 0.027776 |          | 0.006299 |         |
| 12       | 0.027289 |          | 0.056879 |          | 0.064478 |          | 0.065419 |          | 0.075945 | 17.78887 | 0.092151 | 17.24615 | 0.081612 | 17.11015 | 0.073776 | 14.60697 | 0.06415  | 18.45837 | 0.056232 | 19.93318 | 0.049173 | 17.6356  | 0.032407 | 17.03603 | 0.010413 |         |
| 13       | 0.036712 |          | 0.073064 |          | 0.0823   |          | 0.083501 |          | 0.096468 |          | 0.109279 |          | 0.09205  |          | 0.086488 |          | 0.075825 |          | 0.061279 |          | 0.054255 |          | 0.036687 |          | 0.018569 |         |
| 14       | 0.046575 |          | 0.087023 |          | 0.099392 | 16.5958  | 0.099252 | 20.39801 | 0.109089 | 20.7358  | 0.122847 | 22.2875  | 0.09992  | 21.39429 | 0.092537 | 21.02633 | 0.083691 | 22.50401 | 0.06908  | 17.39699 | 0.058455 | 22.78286 | 0.040969 |          | 0.025082 |         |
| 15       | 0.056446 |          | 0.105131 |          | 0.110249 |          | 0.112612 |          | 0.129655 |          | 0.141399 |          | 0.112557 |          | 0.101112 |          | 0.086822 |          | 0.074604 |          | 0.061741 |          | 0.045174 |          | 0.03075  |         |
| 16       | 0.068089 |          | 0.118878 | 16.98545 | 0.127931 | 21.99467 | 0.127706 | 22.61277 | 0.137603 | 26.50082 | 0.152176 | 24.1039  | 0.119542 | 25.50182 | 0.106278 | 27.47709 | 0.093256 | 25.27041 | 0.073008 | 23.21524 | 0.065026 | 24.1903  | 0.047189 | 17.15699 | 0.037441 |         |
| 17       | 0.082663 |          | 0.13277  |          | 0.139659 |          | 0.145697 |          | 0.15041  |          | 0.163002 |          | 0.127132 |          | 0.108408 |          | 0.10096  |          | 0.080245 |          | 0.067055 |          | 0.049183 |          | 0.043236 |         |
| 18       | 0.091644 | 13.07656 | 0.145026 | 20.79844 | 0.155312 | 26.02545 | 0.159106 | 26.99205 | 0.165848 | 31.94265 | 0.173297 | 32.09064 | 0.134242 | 27.60082 | 0.115943 | 29.92848 | 0.099567 | 29.52234 | 0.082979 | 23.33688 | 0.071437 | 26.78002 | 0.050695 | 16.14601 | 0.046775 |         |
| 19       | 0.098637 |          | 0.157761 |          | 0.166737 |          | 0.167698 |          | 0.169492 |          | 0.177486 |          | 0.13733  |          | 0.121618 |          | 0.102893 |          | 0.084978 |          | 0.074209 |          | 0.055808 |          | 0.047704 |         |
| 20       | 0.103102 | 1.81E+01 | 0.169999 | 2.63E+01 | 0.176228 | 3.09E+01 | 0.172071 | 3.05E+01 | 0.175472 | 3.50E+01 | 0.182704 | 3.45E+01 | 0.140374 | 3.10E+01 | 0.121205 | 3.24E+01 | 0.109328 | 31.5789  | 0.084024 | 2.69E+01 | 0.080906 | 3.00E+01 | 0.059001 | 20.4     | 0.052385 |         |
| 22       | 0.12214  | 22.38457 | 0.200359 | 28.63737 | 0.187896 | 34.03706 | 0.193839 | 34.97546 | 0.197762 | 37.49767 | 0.196047 | 38.38291 | 0.148029 | 35.75846 | 0.134339 | 36.73765 | 0.118392 | 34.34776 | 0.08825  | 31.31763 | 0.08238  | 32.08538 | 0.0595   | 22.06079 | 0.057721 |         |
| 25       | 0.138714 | 28.50546 | 0.207017 | 36.15489 | 0.217167 | 37.22995 | 0.215118 | 38.61368 | 0.223455 | 43.0404  | 0.204442 | 42.126   | 0.161728 | 40.56051 | 0.1381   | 38.81884 | 0.125383 | 38.04405 | 0.097971 | 34.92532 | 0.084928 | 34.27588 | 0.063827 | 23.11284 | 0.061694 |         |
| 30       | 0.161172 | 34.70793 | 0.242005 | 41.70086 | 0.237306 | 44.60885 | 0.236728 | 46.84456 | 0.236394 | 49.32508 | 0.22875  | 47.43447 | 0.175413 | 45.44265 | 0.143596 | 43.81555 | 0.132263 | 41.67873 | 0.098039 | 40.10779 | 0.086676 | 36.46998 | 0.069544 | 29.64631 | 0.067117 |         |

| φ = 2.35 |          |          |          |          |          |          |          |          |          |          |          |          |
|----------|----------|----------|----------|----------|----------|----------|----------|----------|----------|----------|----------|----------|
| v (cm/s) | 5.89     |          | 6.48     |          | 7.07     |          | 7.66     |          | 8.25     |          | 8.84     |          |
| HAB (mm) | fv (ppm) | Rg (nm)  |
| 2        | 0.000628 |          | 0.000648 |          | 0.000612 |          | 0.000644 |          | 0.00065  |          | 0.000583 |          |
| 3        | 0.000585 |          | 0.000776 |          | 0.000785 |          | 0.000866 |          | 0.000868 |          | 0.000779 |          |
| 4        | 0.000847 |          | 0.001153 |          | 0.001329 |          | 0.001631 |          | 0.001831 |          | 0.001678 |          |
| 5        | 0.001533 |          | 0.002358 |          | 0.003188 |          | 0.004391 |          | 0.005558 |          | 0.005776 |          |
| 6        | 0.00341  |          | 0.005496 |          | 0.009232 |          | 0.013935 |          | 0.018344 |          | 0.020211 |          |
| 7        | 0.007228 |          | 0.013534 |          | 0.023829 |          | 0.035549 |          | 0.044631 |          | 0.047304 |          |
| 8        | 0.015698 |          | 0.029438 |          | 0.050614 |          | 0.070188 |          | 0.080251 |          | 0.082808 |          |
| 9        | 0.030873 |          | 0.055693 |          | 0.08608  |          | 0.110645 |          | 0.123783 |          | 0.117488 |          |
| 10       | 0.051185 |          | 0.08755  |          | 0.123965 |          | 0.153513 |          | 0.158085 |          | 0.154155 | 24.17539 |
| 11       | 0.078214 |          | 0.119791 |          | 0.165699 |          | 0.188605 |          | 0.190893 |          | 0.18235  |          |
| 12       | 0.1105   |          | 0.154229 |          | 0.197858 | 20.01678 | 0.226038 | 24.77416 | 0.221802 | 25.20403 | 0.208951 | 28.35451 |
| 13       | 0.140402 |          | 0.184937 |          | 0.233944 |          | 0.255203 |          | 0.249226 |          | 0.232274 |          |
| 14       | 0.166442 | 18.1673  | 0.215801 | 24.69922 | 0.268106 | 25.79148 | 0.278266 | 34.36569 | 0.271105 | 35.71564 | 0.244645 | 34.08912 |
| 15       | 0.192661 |          | 0.248125 |          | 0.295809 |          | 0.302618 |          | 0.288159 |          | 0.25787  |          |
| 16       | 0.228219 | 23.80199 | 0.272613 | 31.44477 | 0.319127 | 36.79464 | 0.31536  | 36.87353 | 0.307752 | 37.73235 | 0.268809 | 37.39138 |
| 17       | 0.244331 |          | 0.297582 |          | 0.332114 |          | 0.334641 |          | 0.315952 |          | 0.281354 |          |
| 18       | 0.271345 | 30.75244 | 0.308393 | 38.1365  | 0.351341 | 40.69691 | 0.353536 | 44.75664 | 0.32821  | 43.6003  | 0.29493  | 44.76883 |
| 19       | 0.281382 |          | 0.322406 |          | 0.36263  |          | 0.357394 |          | 0.330537 |          | 0.30299  |          |
| 20       | 0.304794 | 3.75E+01 | 0.341782 | 4.24E+01 | 0.374475 | 4.54E+01 | 0.372449 | 4.87E+01 | 0.354671 | 5.51E+01 | 0.311906 | 4.66E+01 |
| 22       | 0.325221 | 39.0305  | 0.366062 | 46.34212 | 0.404048 | 48.14655 | 0.388894 | 52.04074 | 0.370317 | 55.52032 | 0.32417  | 53.91573 |
| 25       | 0.364212 | 46.02873 | 0.394312 | 51.76913 | 0.421504 | 56.03277 | 0.407822 | 60.72322 | 0.383112 | 62.16585 | 0.330886 | 56.07165 |
| 30       | 0.392705 | 53.89369 | 0.425545 | 60.48384 | 0.441515 | 64.00874 | 0.429145 | 68.40604 | 0.405273 | 70.46068 | 0.351057 | 67.28628 |

Calculated results (Leung): T, fv and Rg vs HAB ( $\phi = 2.0$ )

Calculated results (Leung): T, fv and Rgvs HAB ( $\phi = 2$ ).

| 1.001677 |  |  |  |  |  |  |  |  |  | 6.0000074 |  |  |  |  |  |  |  |  |  | 7.0775026 |  |  |  |  |  |  |  |  |  | 7.6001577 |  |  |  |  |  |  |  |  |  | 8.7270975 |  |  |  |  |  |  |  |  |  | 8.8100281 |  |  |  |  |  |  |  |  |  | 14.010105 |  |  |  |  |  |  |  |  |  |  |  | 10.000079 |  |  |  |  |  |  |  |  |  |  |  | 10.010074 |  |  |  |  |  |  |  |  |  |  |  | 10.1709279 |  |  |  |  |  |  |  |  |  |  |  |  |  | 11.7707925 |  |  |  |  |  |  |  |  |  |  |  |  |  |  |  | 12.787178 |  |  |  |  |  |  |  |  |  |  |  |  |  |  |  | 13.760305 |  |  |  |  |  |  |  |  |  |  |  |  |  |  |  | 15.570411 |  |  |  |  |  |  |  |  |  |  |  |  |  |  |  | 0 |  |  |  |  |  |  |  |  |  |  |  |  |  |  |  | 0 |  |  |  |  |  |  |  |  |  |  |  |  |  |  |  | 0 |  |  |  |  |  |  |  |  |  |  |  |  |  |  |  | 0 |  |  |  |  |  |  |  |  |  |  |  |  |  |  |  | 0 |  |  |  |  |  |  |  |  |  |  |  |  |  |  |  | 0 |  |  |  |  |  |  |  |  |  |  |  |  |  |  |  | 0 |  |  |  |  |  |  |  |  |  |  |  |  |  |  |  | 0 |  |  |  |  |  |  |  |  |  |  |  |  |  |  |  | 0 |  |  |  |  |  |  |  |  |  |  |  |  |  |  |  | 0 |  |  |  |  |  |  |  |  |  |  |  |  |  |  |  | 0 |  |  |  |  |  |  |  |  |  |  |  |  |  |  |  | 0 |  |  |  |  |  |  |  |  |  |  |  |  |  |  |  | 0 |  |  |  |  |  |  |  |  |  |  |  |  |  |  |  | 0 |  |  |  |  |  |  |  |  |  |  |  |  |  |  |  | 0 |  |  |  |  |  |  |  |  |  |  |  |  |  |  |  | 0 |  |  |  |  |  |  |  |  |  |  |  |  |  |  |  | 0 |  |  |  |  |  |  |  |  |  |  |  |  |  |  |  | 0 |  |  |  |  |  |  |  |  |  |  |  |  |  |  |  | 0 |  |  |  |  |  |  |  |  |  |  |  |  |  |  |  | 0 |  |  |  |  |  |  |  |  |  |  |  |  |  |  |  | 0 |  |  |  |  |  |  |  |  |  |  |  |  |  |  |  | 0 |  |  |  |  |  |  |  |  |  |  |  |  |  |  |  | 0 |  |  |  |  |  |  |  |  |  |  |  |  |  |  |  | 0 |  |  |  |  |  |  |  |  |  |  |  |  |  |  |  | 0 |  |  |  |  |  |  |  |  |  |  |  |  |  |  |  | 0 |  |  |  |  |  |  |  |  |  |  |  |  |  |  |  | 0 |  |  |  |  |  |  |  |  |  |  |  |  |  |  |  | 0 |  |  |  |  |  |  |  |  |  |  |  |  |  |  |  | 0 |  |  |  |  |  |  |  |  |  |  |  |  |  |  |  | 0 |  |  |  |  |  |  |  |  |  |  |  |  |  |  |  | 0 |  |  |  |  |  |  |  |  |  |  |  |  |  |  |  | 0 |  |  |  |  |  |  |  |  |  |  |  |  |  |  |  | 0 |  |  |  |  |  |  |  |  |  |  |  |  |  |  |  | 0 |  |  |  |  |  |  |  |  |  |  |  |  |  |  |  | 0 |  |  |  |  |  |  |  |  |  |  |  |  |  |  |  | 0 |  |  |  |  |  |  |  |  |  |  |  |  |  |  |  | 0 |  |  |  |  |  |  |  |  |  |  |  |  |  |  |  | 0 |  |  |  |  |  |  |  |  |  |  |  |  |  |  |  | 0 |  |  |  |  |  |  |  |  |  |  |  |  |  |  |  | 0 |  |  |  |  |  |  |  |  |  |  |  |  |  |  |  | 0 |  |  |  |  |  |  |  |  |  |  |  |  |  |  |  | 0 |  |  |  |  |  |  |  |  |  |  |  |  |  |  |  | 0 |  |  |  |  |  |  |  |  |  |  |  |  |  |  |  | 0 |  |  |  |  |  |  |  |  |  |  |  |  |  |  |  | 0 |  |  |  |  |  |  |  |  |  |  |  |  |  |  |  | 0 |  |  |  |  |  |  |  |  |  |  |  |  |  |  |  | 0 |  |  |  |  |  |  |  |  |  |  |  |  |  |  |  | 0 |  |  |  |  |  |  |  |  |  |  |  |  |  |  |  | 0 |  |  |  |  |  |  |  |  |  |  |  |  |  |  |  | 0 |  |  |  |  |  |  |  |  |  |  |  |  |  |  |  | 0 |  |  |  |  |  |  |  |  |  |  |  |  |  |  |  | 0 |  |  |  |  |  |  |  |  |  |  |  |  |  |  |  | 0 |  |  |  |  |  |  |  |  |  |  |  |  |  |  |  | 0 |  |  |  |  |  |  |  |  |  |  |  |  |  |  |  | 0 |  |  |  |  |  |  |  |  |  |  |  |  |  |  |  | 0 |  |  |  |  |  |  |  |  |  |  |  |  |  |  |  | 0 |  |  |  |  |  |  |  |  |  |  |  |  |  |  |  | 0 |  |  |  |  |  |  |  |  |  |  |  |  |  |  |  | 0 |  |  |  |  |  |  |  |  |  |  |  |  |  |  |  | 0 |  |  |  |  |  |  |  |  |  |  |  |  |  |  |  | 0 |  |  |  |  |  |  |  |  |  |  |  |  |  |  |  | 0 |  |  |  |  |  |  |  |  |  |  |  |  |  |  |  | 0 |  |  |  |  |  |  |  |  |  |  |  |  |  |  |  | 0 |  |  |  |  |  |  |  |  |  |  |  |  |  |  |  | 0 |  |  |  |  |  |  |  |  |  |  |  |  |  |  |  | 0 |  |  |  |  |  |  |  |  |  |  |  |  |  |  |  | 0 |  |  |  |  |  |  |  |  |  |  |  |  |  |  |  | 0 |  |  |  |  |  |  |  |  |  |  |  |  |  |  |  | 0 |  |  |  |  |  |  |  |  |  |  |  |  |  |  |  | 0 |  |  |  |  |  |  |  |  |  |  |  |  |  |  |  | 0 |  |  |  |  |  |  |  |  |  |  |  |  |  |  |  | 0 |  |  |  |  |  |  |  |  |  |  |  |  |  |  |  | 0 |  |  |  |  |  |  |  |  |  |  |  |  |  |  |  | 0 |  |  |  |  |  |  |  |  |  |  |  |  |  |  |  | 0 |  |  |  |  |  |  |  |  |  |  |  |  |  |  |  | 0 |  |  |  |  |  |  |  |  |  |  |  |  |  |  |  | 0 |  |  |  |  |  |  |  |  |  |  |  |  |  |  |  | 0 |  |  |  |  |  |  |  |  |  |  |  |  |  |  |  | 0 |  |  |  |  |  |  |  |  |  |  |  |  |  |  |  | 0 |  |  |  |  |  |  |  |  |  |  |  |  |  |  |  | 0 |  |  |  |  |  |  |  |  |  |  |  |  |  |  |  | 0 |  |  |  |  |  |  |  |  |  |  |  |  |  |  |  | 0 |  |  |  |  |  |  |  |  |  |  |  |  |  |  |  | 0 |  |  |  |  |  |  |  |  |  |  |  |  |  |  |  | 0 |  |  |  |  |  |  |  |  |  |  |  |  |  |  |  | 0 |  |  |  |  |  |  |  |  |  |  |  |  |  |  |  | 0 |  |  |  |  |  |  |  |  |  |  |  |  |  |  |  | 0 |  |  |  |  |  |  |  |  |  |  |  |  |  |  |  | 0 |  |  |  |  |  |  |  |  |  |  |  |  |  |  |  | 0 |  |  |  |  |  |  |  |  |  |  |  |  |  |  |  | 0 |  |  |  |  |  |  |  |  |  |  |  |  |  |  |  | 0 |  |  |  |  |  |  |  |  |  |  |  |  |  |  |  | 0 |  |  |  |  |  |  |  |  |  |  |  |  |  |  |  | 0 |  |  |  |  |  |  |  |  |  |  |  |  |  |  |  | 0 |  |  |  |  |  |  |  |  |  |  |  |  |  |  |  | 0 |  |  |  |  |  |  |  |  |  |  |  |  |  |  |  | 0 |  |  |  |  |  |  |  |  |  |  |  |  |  |  |  | 0 |  |  |  |  |  |  |  |  |  |  |  |  |  |  |  | 0 |  |  |  |  |  |  |  |  |  |  |  |  |  |  |  | 0 |  |  |  |  |  |  |  |  |  |  |  |  |  |  |  | 0 |  |  |  |  |  |  |  |  |  |  |  |  |  |  |  | 0 |  |  |  |  |  |  |  |  |  |  |  |  |  |  |  | 0 |  |  |  |  |  |  |  |  |  |  |  |  |  |  |  | 0 |  |  |  |  |  |  |  |  |  |  |  |  |  |  |  | 0 |  |  |  |  |  |  |  |  |  |  |  |  |  |  |  | 0 |  |  |  |  |  |  |  |  |  |  |  |  |  |  |  | 0 |  |  |  |  |  |  |  |  |  |  |  |  |  |  |  | 0 |  |  |  |  |  |  |  |  |  |  |  |  |  |  |  | 0 |  |  |  |  |  |  |  |  |  |  |  |  |  |  |  | 0 |  |  |  |  |  |  |  |  |  |  |  |  |  |  |  | 0 |  |  |  |  |  |  |  |  |  |  |  |  |  |  |  | 0 |  |  |  |  |  |  |  |  |  |  |  |  |  |  |  | 0 |  |  |  |  |  |  |  |  |  |  |  |  |  |  |  | 0 |  |  |  |  |  |  |  |  |  |  |  |  |  |  |  | 0 |  |  |  |  |  |  |  |  |  |  |  |  |  |  |  | 0 |  |  |  |  |  |  |  |  |  |  |  |  |  |  |  | 0 |  |  |  |  |  |  |  |  |  |  |  |  |  |  |  | 0 |  |  |  |  |  |  |  |  |  |  |  |  |  |  |  | 0 |  |  |  |  |  |  |  |  |  |  |  |  |  |  |  | 0 |  |  |  |  |  |  |  |  |  |  |  |  |  |  |  | 0 |  |  |  |  |  |  |  |  |  |  |  |  |  |  |  | 0 |  |  |  |  |  |  |  |  |  |  |  |  |  |  |  | 0 |  |  |  |  |  |  |  |  |  |  |  |  |  |  |  | 0 |  |  |  |  |  |  |  |  |  |  |  |  |  |  |  | 0 |  |  |  |  |  |  |  |  |  |  |  |  |  |  |  | 0 |  |  |  |  |  |  |  |  |  |  |  |  |  |  |  | 0 |  |  |  |  |  |  |  |  |  |  |  |  |  |  |  | 0 |  |  |  |  |  |  |  |  |  |  |  |  |  |  |  | 0 |  |  |  |  |  |  |  |  |  |  |  |  |  |  |  | 0 |  |  |  |  |  |  |  |  |  |  |  |  |  |  |  | 0 |  |  |  |  |  |  |  |  |  |  |  |  |  |  |  | 0 |  |  |  |  |  |  |  |  |  |  |  |  |  |  |  | 0 |  |  |  |  |  |  |  |  |  |  |  |  |  |  |  | 0 |  |  |  |  |  |  |  |  |  |  |  |  |  |  |  | 0 |  |  |  |  |  |  |  |  |  |  |  |  |  |  |  | 0 |  |  |  |  |  |  |  |  |  |  |  |  |  |  |  | 0 |  |  |  |  |  |  |  |  |  |  |  |  |  |  |  | 0 |  |  |  |  |  |  |  |  |  |  |  |  |  |  |  | 0 |  |  |  |  |  |  |  |  |  |  |  |  |  |  |  | 0 |  |  |  |  |  |  |  |  |  |  |  |  |  |  |  | 0 |  |  |  |  |  |  |  |  |  |  |  |  |  |  |  | 0 |  |  |  |  |  |  |  |  |  |  |  |  |  |  |  | 0 |  |  |  |  |  |  |  |  |  |  |  |  |  |  |  | 0 |  |  |  |  |  |  |  |  |  |  |  |  |  |  |  | 0 |  |  |  |  |  |  |  |  |  |  |  |  |  |  |  | 0 |  |  |  |  |  |  |  |  |  |  |  |  |  |  |  | 0 |  |  |  |  |  |  |  |  |  |  |  |  |  |  |  | 0 |  |  |  |  |  |  |  |  |  |  |  |  |  |  |  | 0 |  |  |  |  |  |  |  |  |  |  |  |  |  |  |  | 0 |  |  |  |  |  |  |  |  |  |  |  |  |  |  |  | 0 |  |  |  |  |  |  |  |  |  |  |  |  |  |  |  | 0 |  |  |  |  |  |  |  |  |  |  |  |  |  |  |  | 0 |  |  |  |  |  |  |  |  |  |  |  |  |  |  |  | 0 |  |  |  |  |  |  |  |  |  |  |  |  |  |  |  | 0 |  |  |  |  |  |  |  |  |  |  |  |  |  |  |  | 0 |  |  |  |  |  |  |  |  |  |  |  |  |  |  |  | 0 |  |  |  |  |  |  |  |  |  |  |  |  |  |  |  | 0 |  |  |  |  |  |  |  |  |  |  |  |  |  |  |  | 0 |  |  |  |  |  |  |  |  |  |  |  |  |  |  |  | 0 |  |  |  |  |  |  |  |  |  |  |  |  |  |  |  | 0 |  |  |  |  |  |  |  |  |  |  |  |  |  |  |  | 0 |  |  |  |  |  |  |  |  |  |  |  |  |  |  |  | 0 |  |  |  |  |  |  |  |  |  |  |  |  |  |  |  | 0 |  |  |  |  |  |  |  |  |  |  |  |  |  |  |  | 0 |  |  |  |  |  |  |  |  |  |  |  |  |  |  |  | 0 |  |  |  |  |  |  |  |  |  |  |  |  |  |  |  | 0 |  |  |  |  |  |  |  |  |  |  |  |  |  |  |  | 0 |  |  |  |  |  |  |  |  |  |  |  |  |  |  |  | 0 |  |  |  |  |  |  |  |  |  |  |  |  |  |  |  | 0 |  |  |  |  |  |  |  |  |  |  |  |  |  |  |  | 0 |  |  |  |  |  |  |  |  |  |  |  |  |  |  |  | 0 |  |  |  |  |  |  |  |  |  |  |  |  |  |  |  | 0 |  |  |  |  |  |  |  |  |  |  |  |  |  |  |  | 0 |  |  |  |  |  |  |  |  |  |  |  |  |  |  |  | 0 |  |  |  |  |  |  |  |  |  |  |  |  |  |  |  | 0 |  |  |  |  |  |  |  |  |  |  |  |  |  |  |  | 0 |  |  |  |  |  |  |  |  |  |  |  |  |  |  |  | 0 |  |  |  |  |  |  |  |  |  |  |  |  |  |  |  | 0 |  |  |  |  |  |  |  |  |  |  |  |  |  |  |  | 0 |  |  |  |  |  |  |  |  |  |  |  |  |  |  |  | 0 |  |  |  |  |  |  |  |  |  |  |  |  |  |  |  | 0 |  |  |  |  |  |  |  |  |  |  |  |  |  |  |  | 0 |  |  |  |  |  |  |  |  |  |  |  |  |  |  |  | 0 |  |  |  |  |  |  |  |  |  |  |  |  |  |  |  | 0 |  |  |  |  |  |  |  |  |  |  |  |  |  |  |  | 0 |  |  |  |  |  |  |  |  |  |  |  |  |  |  |  | 0 |  |  |  |  |  |  |  |  |  |  |  |  |  |  |  | 0 |  |  |  |  |  |  |  |  |  |  |  |  |  |  |  | 0 |  |  |  |  |  |  |  |  |  |  |  |  |  |  |  | 0 |  |  |  |  |  |  |  |  |  |  |  |  |  |  |  | 0 |  |  |  |  |  |  |  |  |  |  |  |  |  |  |  | 0 |  |  |  |  |  |  |  |  |  |  |  |  |  |  |  | 0 |  |  |  |  |  |  |  |  |  |  |  |  |  |  |  | 0 |  |  |  |  |  |  |  |  |  |  |  |  |  |  |  | 0 |  |  |  |  |  |  |  |  |  |  |  |  |  |  |  | 0 |  |  |  |  |  |  |  |  |  |  |  |  |  |  |  | 0 |  |  |  |  |  |  |  |  |  |  |  |  |  |  |  | 0 |  |  |  |  |  |  |  |  |  |  |  |  |  |  |  | 0 |  |  |  |  |  |  |  |  |  |  |  |  |  |  |  | 0 |  |  |  |  |  |  |  |  |  |  |  |  |  |  |  | 0 |  |  |  |  |  |  |  |  |  |  |  |  |  |  |  | 0 |  |  |  |  |  |  |  |  |  |  |  |  |  |  |  | 0 |  |  |  |  |  |  |  |  |  |  |  |  |  |  |  | 0 |  |  |  |  |  |  |  |  |  |  |  |  |  |  |  | 0 |  |  |  |  |  |  |  |  |  |  |  |  |  |  |  | 0 |  |  |  |  |  |  |  |  |  |  |  |  |  |  |  | 0 |  |  |  |  |  |  |  |  |  |  |  |  |  |  |  | 0 |  |  |  |  |  |  |  |  |  |  |  |  |  |  |  | 0 |  |  |  |  |  |  |  |  |  |  |  |  |  |  |  | 0 |  |  |  |  |  |  |  |  |  |  |  |  |  |  |  | 0 |  |  |  |  |  |  |  |  |  |  |  |  |  |  |  | 0 |  |  |  |  |  |  |  |  |  |  |  |  |  |  |  | 0 |  |  |  |  |  |  |  |  |  |  |  |  |  |  |  | 0 |  |  |  |  |  |  |  |  |  |  |  |  |  |  |  | 0 |  |  |  |  |  |  |  |  |  |  |  |  |  |  |  | 0 |  |  |  |  |  |  |  |  |  |  |  |  |  |  |  | 0 |  |  |  |  |  |  |  |  |  |  |  |  |  |  |  | 0 |  |  |  |  |  |  |  |  |  |  |  |  |  |  |  | 0 |  |  |  |  |  |  |  |  |  |  |  |  |  |  |  | 0 |  |  |  |  |  |  |  |  |  |  |  |  |  |  |  | 0 |  |  |  |  |  |  |  |  |  |  |  |  |  |  |  | 0 |  |  |  |  |  |  |  |  |  |  |  |  |  |  |  | 0 |  |  |  |  |  |  |  |  |  |  |  |  |  |  |  | 0 |  |  |  |  |  |  |  |  |  |  |  |  |  |  |  | 0 |  |  |  |  |  |  |  |  |  |  |  |  |  |  |  | 0 |  |  |  |  |  |  |  |  |  |  |  |  |  |  |  | 0 |  |  |  |  |  |  |  |  |  |  |  |  |  |  |  | 0 |  |  |  |  |  |  |  |  |  |  |  |  |  |  |  | 0 |  |  |  |  |  |  |  |  |  |  |  |  |  |  |  | 0 |  |  |  |  |  |  |  |  |  |  |  |  |  |  |  | 0 |  |  |  |  |  |  |  |  |  |  |  |  |  |  |  | 0 |  |  |  |  |  |  |  |  |  |  |  |  |  |  |  | 0 |  |  |  |  |  |  |  |  |  |  |  |  |  |  |  | 0 |  |  |  |  |  |  |  |  |  |  |  |  |  |  |  | 0 |  |  |  |  |  |  |  |  |  |  |  |  |  |  |  | 0 |  |  |  |  |  |  |  |  |  |  |  |  |  |  |  | 0 |  |  |  |  |  |  |  |  |  |  |  |  |  |  |  | 0 |  |  |  |  |  |  |  |  |  |  |  |  |  |  |  | 0 |  |  |  |  |  |  |  |  |  |  |  |  |  |  |  | 0 |  |  |  |  |  |  |  |  |  |  |  |  |  |  |  | 0 |  |  |  |  |  |  |  |  |  |  |  |  |  |  |  | 0 |  |  |  |  |  |  |  |  |  |  |  |  |  |  |  | 0 |  |  |  |  |  |  |  |  |  |  |  |  |  |  |  | 0 |  |  |  |  |  |  |  |  |  |  |  |  |  |  |  | 0 |  |  |  |  |  |  |  |  |  |  |  |  |  |  |  | 0 |  |  |  |  |  |  |  |  |  |  |  |  |  |  |  | 0 |  |  |  |  |  |  |  |  |  |  |  |  |  |  |  | 0 |  |  |  |  |  |  |  |  |  |  |  |  |  |  |  | 0 |  |  |  |  |  |  |  |  |  |  |  |  |  |  |  | 0 |  |  |  |  |  |  |  |  |  |  |  |  |  |  |  | 0 |  |  |  |  |  |  |  |  |  |  |  |  |  |  |  | 0 |  |  |  |  |  |  |  |  |  |  |  |  |  |  |  | 0 |  |  |  |  |  |  |  |  |  |  |  |  |  |  |  | 0 |  |  |  |  |  |  |  |  |  |  |  |  |  |  |  | 0 |  |  |  |  |  |  |  |  |  |  |  |  |  |  |  | 0 |  |  |  |  |  |  |  |  |  |  |  |  |  |  |  | 0 |  |  |  |  |  |  |  |  |  |  |  |  |  |  |  | 0 |  |  |  |  |  |  |  |  |  |  |  |  |  |  |  | 0 |  |  |  |  |  |  |  |  |  |  |  |  |  |  |  | 0 |  |  |  |  |  |  |  |  |  |  |  |  |  |  |  | 0 |  |  |  |  |  |  |  |  |  |  |  |  |  |  |  | 0 |  |  |  |  |  |  |  |  |  |  |  |  |  |  |  | 0 |  |  |  |  |  |  |  |  |  |  |  |  |  |  |  | 0 |  |  |  |  |  |  |  |  |  |  |  |  |  |  |  | 0 |  |  |  |  |  |  |  |  |  |  |  |  |  |  |  | 0 |  |  |  |  |  |  |  |  |  |  |  |  |  |  |  | 0 |  |  |  |  |  |  |  |  |  |  |  |  |  |  |  | 0 |  |  |  |  |  |  |  |  |  |  |  |  |  |  |  | 0 |  |  |  |  |  |  |  |  |  |  |  |  |  |  |  | 0 |  |  |  |  |  |  |  |  |  |  |  |  |  |  |  | 0 |  |  |  |  |  |  |  |  |  |  |  |  |  |  |  | 0 |  |  |  |  |  |  |  |  |  |  |  |  |  |  |  | 0 |  |  |  |  |  |  |  |  |  |  |  |  |  |  |  | 0 |  |  |  |  |  |  |  |  |  |  |  |  |  |  |  | 0 |  |  |  |  |  |  |  |  |  |  |  |  |  |  |  | 0 |  |  |  |  |  |  |  |  |  |  |  |  |  |  |  | 0 |  |  |  |  |  |  |  |  |  |  |  |  |  |  |  | 0 |  |  |  |  |  |  |  |  |  |  |  |  |  |  |  | 0 |  |  |  |  |  |  |  |  |  |  |  |  |  |  |  | 0 |  |  |  |  |  |  |  |  |  |  |  |  |  |  |  | 0 |  |  |  |  |  |  |  |  |  |  |  |  |  |  |  | 0 |  |  |  |  |  |  |  |  |  |  |  |  |  |  |  | 0 |  |  |  |  |  |  |  |  |  |  |  |  |  |  |  | 0 |  |  |  |  |  |  |  |  |  |  |  |  |  |  |  | 0 |  |  |  |  |  |  |  |  |  |  |  |  |  |  |  | 0 |  |  |  |  |  |  |  |  |  |  |  |  |  |  |  | 0 |  |  |  |  |  |  |  |  |  |  |  |  |  |  |  | 0 |  |  |  |  |  |  |  |  |  |  |  |  |  |  |  | 0 |  |  |  |  |  |  |  |  |  |  |  |  |  |  |  | 0 |  |  |  |  |  |  |  |  |  |  |  |  |  |  |  | 0 |  |  |  |  |  |  |  |  |  |  |  |  |  |  |  | 0 |  |  |  |  |  |  |  |  |  |  |  |  |  |  |  | 0 |  |  |  |  |  |  |  |  |  |  |  |  |  |  |  | 0 |  |  |  |  |  |  |  |  |  |  |  |  |  |  |  | 0 |  |  |  |  |  |  |  |  |  |  |  |  |  |  |  | 0 |  |  |  |  |  |  |  |  |  |  |  |  |  |  |  | 0 |  |  |  |  |  |  |  |  |  |  |  |  |  |  |  | 0 |  |  |  |  |  |  |  |  |  |  |  |  |  |  |  | 0 |  |  |  |  |  |  |  |  |  |  |  |  |  |  |  | 0 |  |  |  |  |  |  |  |  |  |  |  |  |  |  |  | 0 |  |  |  |  |  |  |  |  |  |  |  |  |  |  |  | 0 |  |  |  |  |  |  |  |  |  |  |  |  |  |  |  | 0 |  |  |  |  |  |  |  |  |  |  |  |  |  |  |  | 0 |  |  |  |  |  |  |  |  |  |  |  |  |  |  |  | 0 |  |  |  |  |  |  |  |  |  |  |  |  |  |  |  | 0 |  |  |  |  |  |  |  |  |  |  |  |  |  |  |  | 0 |  |  |  |  |  |  |  |  |  |  |  |  |  |  |  | 0 |  |  |  |  |  |  |  |  |  |  |  |  |  |  |  | 0 |  |  |  |  |  |  |  |  |  |  |  |  |  |  |  | 0 |  |  |  |  |  |  |  |  |  |  |  |  |  |  |  | 0 |  |  |  |  |  |  |  |  |  |  |  |  |  |  |  | 0 |  |  |  |  |  |  |  |  |  |  |  |  |  |  |  | 0 |  |  |  |  |  |  |  |  |  |  |  |  |  |  |  | 0 |  |  |  |  |  |  |  |  |  |  |  |  |  |  |  | 0 |  |  |  |  |  |  |  |  |  |  |  |  |  |  |  | 0 |  |  |  |  |  |  |  |  |  |  |  |  |  |  |  | 0 |  |  |  |  |  |  |  |  |  |  |  |  |  |  |  | 0 |  |  |  |  |  |  |  |  |  |  |  |  |  |  |  | 0 |  |  |  |  |  |  |  |  |  |  |  |  |  |  |  | 0 |  |  |  |  |  |  |  |  |  |  |  |  |  |  |  | 0 |  |  |  |  |  |  |  |  |  |  |  |  |  |  |  | 0 |  |  |  |  |  |  |  |  |  |  |  |  |  |  |  | 0 |  |  |  |  |  |  |  |  |  |  |  |  |  |  |  | 0 |  |  |  |  |  |  |  |  |  |  |  |  |  |  |  | 0 |  |  |  |  |  |  |  |  |  |  |  |  |  |  |  | 0 |  |  |  |  |  |  |  |  |  |  |  |  |  |  |  | 0 |  |  |  |  |  |  |  |  |  |  |  |  |  |  |  | 0 |  |  |  |  |  |  |  |  |  |  |  |  |  |  |  | 0 |  |  |  |  |  |  |  |  |  |  |  |  |  |  |  | 0 |  |  |  |  |  |  |  |  |  |  |  |  |  |  |  | 0 |  |  |  |  |  |  |  |  |  |  |  |  |  |  |  | 0 |  |  |  |  |  |  |  |  |  |  |  |  |  |  |  | 0 |  |  |  |  |  |  |  |  |  |  |  |  |  |  |  | 0 |  |  |  |  |  |  |  |  |  |  |  |  |  |  |  | 0 |  |  |  |  |  |  |  |  |  |  |  |  |  |  |  | 0 |  |  |  |  |  |  |  |  |  |  |  |  |  |  |  | 0 |  |  |  |  |  |  |  |  |  |  |  |  |  |  |  | 0 |  |  |  |  |  |  |  |  |  |  |  |  |  |  |  | 0 |  |  |  |  |  |  |  |  |  |  |  |  |  |  |  | 0 |  |  |  |  |  |  |  |  |  |  |  |  |  |  |  | 0 |  |  |  |  |  |  |  |  |  |  |  |  |  |  |  | 0 |  |  |  |  |  |  |  |  |  |  |  |  |  |  |  | 0 |  |  |  |  |  |  |  |  |  |  |  |  |  |  |  | 0 |  |  |  |  |  |  |  |  |  |  |  |  |  |  |  | 0 |  |  |  |  |  |  |  |  |  |  |  |  |  |  |  | 0 |  |  |  |  |  |  |  |  |  |  |  |  |  |  |  | 0 |  |  |  |  |  |  |  |  |  |  |  |  |  |  |  | 0 |  |  |  |  |  |  |  |  |  |  |  |  |  |  |  | 0 |  |  |  |  |  |  |  |  |  |  |  |  |  |  |  | 0 |  |  |  |  |  |  |  |  |  |  |  |  |  |  |  | 0 |  |  |  |  |  |  |  |  |  |  |  |  |  |  |  | 0 |  |  |  |  |  |  |  |  |  |  |  |  |  |  |  | 0 |  |  |  |  |  |  |  |  |  |  |  |  |  |  |  | 0 |  |  |  |  |  |  |  |  |  |  |  |  |  |  |  | 0 |  |  |  |  |  |  |  |  |  |  |  |  |  |  |  | 0 |  |  |  |  |  |  |  |  |  |  |  |  |  |  |  | 0 |  |  |  |  |  |  |  |  |  |  |  |  |  |  |  | 0 |  |  |  |  |  |  |  |  |  |  |  |  |  |  |  | 0 |  |  |  |  |  |  |  |  |  |  |  |  |  |  |  | 0 |  |  |  |  |  |  |  |  |  |  |  |  |  |  |  | 0 |  |  |  |  |  |  |  |  |  |  |  |  |  |  |  | 0 |  |  |  |  |  |  |  |  |  |  |  |  |  |  |  | 0 |  |  |  |  |  |  |  |  |  |  |  |  |  |  |  | 0 |  |  |  |  |  |  |  |  |  |  |  |  |  |  |  | 0 |  |  |  |  |  |  |  |  |  |  |  |  |  |  |  | 0 |  |  |  |  |  |  |  |  |  |  |  |  |  |  |  | 0 |  |  |  |  |  |  |  |  |  |  |  |  |  |  |  | 0 |  |  |  |  |  |  |  |  |  |  |  |  |  |  |  | 0 |  |  |  |  |  |  |  |  |  |  |  |  |  |  |  | 0 |  |  |  |  |  |  |  |  |  |  |  |  |  |  |  | 0 |  |  |  |  |  |  |  |  |  |  |  |  |  |  |  | 0 |  |  |  |  |  |  |  |  |  |  |  |  |  |  |  | 0 |  |  |  |  |  |  |  |  |  |  |  |  |  |  |  | 0 |  |  |  |  |  |  |  |  |  |  |  |  |  |  |  | 0 |  |  |  |  |  |  |  |  |  |  |  |  |  |  |  | 0 |  |  |  |  |  |  |  |  |  |  |  |  |  |  |  | 0 |  |  |  |  |  |  |  |  |  |  |  |  |  |  |  | 0 |  |  |  |  |  |  |  |  |  |  |  |  |  |  |  | 0 |  |  |  |  |  |  |  |  |  |  |  |  |  |  |  | 0 |  |  |  |  |  |  |  |  |  |  |  |  |  |  |  | 0 |  |  |  |  |  |  |  |  |  |  |  |  |  |  |  | 0 |  |  |  |  |  |  |  |  |  |  |  |  |  |  |  | 0 |  |  |  |  |  |  |  |  |  |  |  |  |  |  |  | 0 |  |  |  |  |  |  |  |  |  |  |  |  |  |  |  | 0 |  |  |  |  |  |  |  |  |  |  |  |  |  |  |  | 0 |  |  |  |  |  |  |  |  |  |  |  |  |  |  |  | 0 |  |  |  |  |  |  |  |  |  |  |  |  |  |  |  | 0 |  |  |  |  |  |  |  |  |  |  |  |  |  |  |  | 0 |  |  |  |  |  |  |  |  |  |  |  |  |  |  |  | 0 |  |  |  |  |  |  |  |  |  |  |  |  |  |  |  | 0 |  |  |  |  |  |  |  |  |  |  |  |  |  |  |  | 0 |  |  |  |  |  |  |  |  |  |  |  |  |  |  |  | 0 |  |  |  |  |  |  |  |  |  |  |  |  |  |  |  | 0 |  |  |  |  |  |  |  |  |  |  |  |  |  |  |  | 0 |  |  |  |  |  |  |  |  |  |  |  |  |  |  |  | 0 |  |  |  |  |  |  |  |  |  |  |  |  |  |  |  | 0 |  |  |  |  |  |  |  |  |  |  |  |  |  |  |  | 0 |  |  |  |  |  |  |  |  |  |  |  |  |  |  |  | 0 |  |  |  |  |  |  |  |  |  |  |  |  |  |  |  | 0 |  |  |  |  |  |  |  |  |  |  |  |  |  |  |  | 0 |  |  |  |  |  |  |  |  |  |  |  |  |  |  |  | 0 |  |  |  |  |  |  |  |  |  |  |  |  |  |  |  | 0 |  |  |  |  |  |  |  |  |  |  |  |  |  |  |  | 0 |  |  |  |  |  |  |  |  |  |  |  |  |  |  |  | 0 |  |  |  |  |  |  |  |  |  |  |  |  |  |  |  | 0 |  |  |  |  |  |  |  |  |  |  |  |  |  |  |  | 0 |  |  |  |  |  |  |  |  |  |  |  |  |  |  |  | 0 |  |  |  |  |  |  |  |  |  |  |  |  |  |  |  | 0 |  |  |  |  |  |  |  |  |  |  |  |  |  |  |  | 0 |  |  |  |  |  |  |  |  |  |  |  |  |  |  |  | 0 |  |  |  |  |  |  |  |  |  |  |  |  |  |  |  | 0 |  |  |  |  |  |  |  |  |  |  |  |  |  |  |  | 0 |  |  |  |  |  |  |  |  |  |  |  |  |  |  |  | 0 |  |  |  |  |  |  |  |  |  |  |  |  |  |  |  | 0 |  |  |  |  |  |  |  |  |  |  |  |  |  |  |  | 0 |  |  |  |  |  |  |  |  |  |  |  |  |  |  |  | 0 |  |  |  |  |  |  |  |  |  |  |  |  |  |  |  | 0 |  |  |  |  |  |  |  |  |  |  |  |  |  |  |  | 0 |  |  |  |  |  |  |  |  |  |  |  |  |  |  |  | 0 |  |  |  |  |  |  |  |  |  |  |  |  |  |  |  | 0 |  |  |  |  |  |  |  |  |  |  |  |  |  |  |  | 0 |  |  |  |  |  |  |  |  |  |  |  |  |  |  |  | 0 |  |  |  |  |  |  |  |  |  |  |  |  |  |  |  | 0 |  |  |  |  |  |  |  |  |  |  |  |  |  |  |  | 0 |  |  |  |  |  |  |  |  |  |  |  |  |  |  |  | 0 |  |  |  |  |  |  |  |  |  |  |  |  |  |  |  | 0 |  |  |  |  |  |  |  |  |  |  |  |  |  |  |  | 0 |  |  |  |  |  |  |  |  |  |  |  |  |  |  |  | 0 |  |  |  |  |  |  |  |  |  |  |  |  |  |  |  | 0 |  |  |  |  |  |  |  |  |  |  |  |  |  |  |  | 0 |  |  |  |  |  |  |  |  |  |  |  |  |  |  |  | 0 |  |  |  |  |  |  |  |  |  |  |  |  |  |  |  | 0 |  |  |  |  |  |  |  |  |  |  |  |  |  |  |  | 0 |  |  |  |  |  |  |  |  |  |  |  |  |  |  |  | 0 |  |  |  |  |  |  |  |  |  |  |  |  |  |  |  | 0 |  |  |  |  |  |  |  |  |  |  |  |  |  |  |  | 0 |  |  |  |  |  |  |  |  |  |  |  |  |  |  |  | 0 |  |  |  |  |  |  |  |  |  |  |  |  |  |  |  | 0 |  |  |  |  |  |  |  |  |  |  |  |  |  |  |  | 0 |  |  |  |  |  |  |  |  |  |  |  |  |  |  |  | 0 |  |  |  |  |  |  |  |  |  |  |  |  |  |  |  | 0 |  |  |  |  |  |  |  |  |  |  |  |  |  |  |  | 0 |  |  |  |  |  |  |  |  |  |  |  |  |  |  |  | 0 |  |  |  |  |  |  |  |  |  |  |  |  |  |  |  | 0 |  |  |  |  |  |  |  |  |  |  |  |  |  |  |  | 0 |  |  |  |  |  |  |  |  |  |  |  |  |  |  |  | 0 |  |  |  |  |  |  |  |  |  |  |  |  |  |  |  | 0 |  |  |  |  |  |  |  |  |  |  |  |  |  |  |  | 0 |  |  |  |  |  |  |  |  |  |  |  |  |  |  |  | 0 |  |  |  |  |  |  |  |  |  |  |  |  |  |  |  | 0 |  |  |  |  |  |  |  |  |  |  |  |  |  |  |  | 0 |  |  |  |  |  |  |  |  |  |  |  |  |  |  |  | 0 |  |  |  |  |  |  |  |  |  |  |  |  |  |  |  | 0 |  |  |  |  |  |  |  |  |  |  |  |  |  |  |  | 0 |  |  |  |  |  |  |  |  |  |  |  |  |  |  |  | 0 |  |  |  |  |  |  |  |  |  |  |  |  |  |  |  | 0 |  |  |  |  |  |  |  |  |  |  |  |  |  |  |  | 0 |  |  |  |  |  |  |  |  |  |  |  |  |  |  |  | 0 |  |  |  |  |  |  |  |  |  |  |  |  |  |  |  | 0 |  |  |  |  |  |  |  |  |  |  |  |  |  |  |  | 0 |  |  |  |  |  |  |  |  |  |  |  |  |  |  |  | 0 |  |  |  |  |  |  |  |  |  |  |  |  |  |  |  | 0 |  |  |  |  |  |  |  |  |  |  |  |  |  |  |  | 0 |  |  |  |  |  |  |  |  |  |  |  |  |  |  |  | 0 |  |  |  |  |  |  |  |  |  |  |  |  |  |  |  | 0 |  |  |  |  |  |  |  |  |  |  |  |  |  |  |  | 0 |  |  |  |  |  |  |  |  |  |  |  |  |  |  |  | 0 |  |  |  |  |  |  |  |  |  |  |  |  |  |  |  | 0 |  |  |  |  |  |  |  |  |  |  |  |  |  |  |  | 0 |  |  |  |  |  |  |  |  |  |  |  |  |  |  |  | 0 |  |  |  |  |  |  |  |  |  |  |  |  |  |  |  | 0 |  |  |  |  |  |  |  |  |  |  |  |  |  |  |  | 0 |  |  |  |  |  |  |  |  |  |  |  |  |  |  |  | 0 |  |  |  |  |  |  |  |  |  |  |  |  |  |  |  | 0 |  |  |  |  |  |  |  |  |  |  |  |  |  |  |  | 0 |  |  |  |  |  |  |  |  |  |  |  |  |  |  |  | 0 |  |  |  |  |  |  |  |  |  |  |  |  |  |  |  | 0 |  |  |  |  |  |  |  |  |  |  |  |  |  |  |  | 0 |  |  |  |  |  |  |  |  |  |  |  |  |  |  |  | 0 |  |  |  |  |  |  |  |  |  |  |  |  |  |  |  | 0 |  |  |  |  |  |  |  |  |  |  |  |  |  |  |  | 0 |  |  |  |  |  |  |  |  |  |  |  |  |  |  |  | 0 |  |  |  |  |  |  |  |  |  |  |  |  |  |  |  | 0 |  |  |  |  |  |  |  |  |  |  |  |  |  |  |  | 0 |  |  |  |  |  |  |  |  |  |  |  |  |  |  |  | 0 |  |  |  |  |  |  |  |  |  |  |  |  |  |  |  | 0 |  |  |  |  |  |  |  |  |  |  |  |  |  |  |  | 0 |  |  |  |  |  |  |  |  |  |  |  |  |  |  |  | 0 |  |  |  |  |  |  |  |  |  |  |  |  |  |  |  | 0 |  |  |  |  |  |  |  |  |  |  |  |  |  |  |  | 0 |  |  |  |  |  |  |  |  |  |  |  |  |  |  |  | 0 |  |  |  |  |  |  |  |  |  |  |  |  |  |  |  | 0 |  |  |  |  |  |  |  |  |  |  |  |  |  |  |  | 0 |  |  |  |  |  |  |  |  |  |  |  |  |  |  |  | 0 |  |  |  |  |  |  |  |  |  |  |  |  |  |  |  | 0 |  |  |  |  |  |  |  |  |  |  |  |  |  |  |  | 0 |  |  |  |  |  |  |  |  |  |  |  |  |  |  |  | 0 |  |  |  |  |  |  |  |  |  |  |  |  |  |  |  | 0 |  |  |  |  |  |  |  |  |  |  |  |  |  |  |  | 0 |  |  |  |  |  |  |  |  |  |  |  |  |  |  |  | 0 |  |  |  |  |  |  |  |  |  |  |  |  |  |  |  | 0 |  |  |  |  |  |  |  |  |  |  |  |  |  |  |  | 0 |  |  |  |  |  |  |  |  |  |  |  |  |  |  |  | 0 |  |  |  |  |  |  |  |  |  |  |  |  |  |  |  | 0 |  |  |  |  |  |  |  |  |  |  |  |  |  |  |  | 0 |  |  |  |  |  |  |  |  |  |  |  |  |  |  |  | 0 |  |  |  |  |  |  |  |  |  |  |  |  |  |  |  | 0 |  |  |  |  |  |  |  |  |  |  |  |  |  |  |  | 0 |  |  |  |  |  |  |  |  |  |  |  |  |  |  |  | 0 |  |  |  |  |  |  |  |  |  |  |  |  |  |  |  | 0 |  |  |  |  |  |  |  |  |  |  |  |  |  |  |  | 0 |  |  |  |  |  |  |  |  |  |  |  |  |  |  |  | 0 |  |  |  |  |  |  |  |  |  |  |  |  |  |  |  | 0 |  |  |  |  |  |  |  |  |  |  |  |  |  |  |  | 0 |  |  |  |  |  |  |  |  |  |  |  |  |  |  |  | 0 |  |  |  |  |  |  |  |  |  |  |  |  |  |  |  |
|----------|--|--|--|--|--|--|--|--|--|-----------|--|--|--|--|--|--|--|--|--|-----------|--|--|--|--|--|--|--|--|--|-----------|--|--|--|--|--|--|--|--|--|-----------|--|--|--|--|--|--|--|--|--|-----------|--|--|--|--|--|--|--|--|--|-----------|--|--|--|--|--|--|--|--|--|--|--|-----------|--|--|--|--|--|--|--|--|--|--|--|-----------|--|--|--|--|--|--|--|--|--|--|--|------------|--|--|--|--|--|--|--|--|--|--|--|--|--|------------|--|--|--|--|--|--|--|--|--|--|--|--|--|--|--|-----------|--|--|--|--|--|--|--|--|--|--|--|--|--|--|--|-----------|--|--|--|--|--|--|--|--|--|--|--|--|--|--|--|-----------|--|--|--|--|--|--|--|--|--|--|--|--|--|--|--|---|--|--|--|--|--|--|--|--|--|--|--|--|--|--|--|---|--|--|--|--|--|--|--|--|--|--|--|--|--|--|--|---|--|--|--|--|--|--|--|--|--|--|--|--|--|--|--|---|--|--|--|--|--|--|--|--|--|--|--|--|--|--|--|---|--|--|--|--|--|--|--|--|--|--|--|--|--|--|--|---|--|--|--|--|--|--|--|--|--|--|--|--|--|--|--|---|--|--|--|--|--|--|--|--|--|--|--|--|--|--|--|---|--|--|--|--|--|--|--|--|--|--|--|--|--|--|--|---|--|--|--|--|--|--|--|--|--|--|--|--|--|--|--|---|--|--|--|--|--|--|--|--|--|--|--|--|--|--|--|---|--|--|--|--|--|--|--|--|--|--|--|--|--|--|--|---|--|--|--|--|--|--|--|--|--|--|--|--|--|--|--|---|--|--|--|--|--|--|--|--|--|--|--|--|--|--|--|---|--|--|--|--|--|--|--|--|--|--|--|--|--|--|--|---|--|--|--|--|--|--|--|--|--|--|--|--|--|--|--|---|--|--|--|--|--|--|--|--|--|--|--|--|--|--|--|---|--|--|--|--|--|--|--|--|--|--|--|--|--|--|--|---|--|--|--|--|--|--|--|--|--|--|--|--|--|--|--|---|--|--|--|--|--|--|--|--|--|--|--|--|--|--|--|---|--|--|--|--|--|--|--|--|--|--|--|--|--|--|--|---|--|--|--|--|--|--|--|--|--|--|--|--|--|--|--|---|--|--|--|--|--|--|--|--|--|--|--|--|--|--|--|---|--|--|--|--|--|--|--|--|--|--|--|--|--|--|--|---|--|--|--|--|--|--|--|--|--|--|--|--|--|--|--|---|--|--|--|--|--|--|--|--|--|--|--|--|--|--|--|---|--|--|--|--|--|--|--|--|--|--|--|--|--|--|--|---|--|--|--|--|--|--|--|--|--|--|--|--|--|--|--|---|--|--|--|--|--|--|--|--|--|--|--|--|--|--|--|---|--|--|--|--|--|--|--|--|--|--|--|--|--|--|--|---|--|--|--|--|--|--|--|--|--|--|--|--|--|--|--|---|--|--|--|--|--|--|--|--|--|--|--|--|--|--|--|---|--|--|--|--|--|--|--|--|--|--|--|--|--|--|--|---|--|--|--|--|--|--|--|--|--|--|--|--|--|--|--|---|--|--|--|--|--|--|--|--|--|--|--|--|--|--|--|---|--|--|--|--|--|--|--|--|--|--|--|--|--|--|--|---|--|--|--|--|--|--|--|--|--|--|--|--|--|--|--|---|--|--|--|--|--|--|--|--|--|--|--|--|--|--|--|---|--|--|--|--|--|--|--|--|--|--|--|--|--|--|--|---|--|--|--|--|--|--|--|--|--|--|--|--|--|--|--|---|--|--|--|--|--|--|--|--|--|--|--|--|--|--|--|---|--|--|--|--|--|--|--|--|--|--|--|--|--|--|--|---|--|--|--|--|--|--|--|--|--|--|--|--|--|--|--|---|--|--|--|--|--|--|--|--|--|--|--|--|--|--|--|---|--|--|--|--|--|--|--|--|--|--|--|--|--|--|--|---|--|--|--|--|--|--|--|--|--|--|--|--|--|--|--|---|--|--|--|--|--|--|--|--|--|--|--|--|--|--|--|---|--|--|--|--|--|--|--|--|--|--|--|--|--|--|--|---|--|--|--|--|--|--|--|--|--|--|--|--|--|--|--|---|--|--|--|--|--|--|--|--|--|--|--|--|--|--|--|---|--|--|--|--|--|--|--|--|--|--|--|--|--|--|--|---|--|--|--|--|--|--|--|--|--|--|--|--|--|--|--|---|--|--|--|--|--|--|--|--|--|--|--|--|--|--|--|---|--|--|--|--|--|--|--|--|--|--|--|--|--|--|--|---|--|--|--|--|--|--|--|--|--|--|--|--|--|--|--|---|--|--|--|--|--|--|--|--|--|--|--|--|--|--|--|---|--|--|--|--|--|--|--|--|--|--|--|--|--|--|--|---|--|--|--|--|--|--|--|--|--|--|--|--|--|--|--|---|--|--|--|--|--|--|--|--|--|--|--|--|--|--|--|---|--|--|--|--|--|--|--|--|--|--|--|--|--|--|--|---|--|--|--|--|--|--|--|--|--|--|--|--|--|--|--|---|--|--|--|--|--|--|--|--|--|--|--|--|--|--|--|---|--|--|--|--|--|--|--|--|--|--|--|--|--|--|--|---|--|--|--|--|--|--|--|--|--|--|--|--|--|--|--|---|--|--|--|--|--|--|--|--|--|--|--|--|--|--|--|---|--|--|--|--|--|--|--|--|--|--|--|--|--|--|--|---|--|--|--|--|--|--|--|--|--|--|--|--|--|--|--|---|--|--|--|--|--|--|--|--|--|--|--|--|--|--|--|---|--|--|--|--|--|--|--|--|--|--|--|--|--|--|--|---|--|--|--|--|--|--|--|--|--|--|--|--|--|--|--|---|--|--|--|--|--|--|--|--|--|--|--|--|--|--|--|---|--|--|--|--|--|--|--|--|--|--|--|--|--|--|--|---|--|--|--|--|--|--|--|--|--|--|--|--|--|--|--|---|--|--|--|--|--|--|--|--|--|--|--|--|--|--|--|---|--|--|--|--|--|--|--|--|--|--|--|--|--|--|--|---|--|--|--|--|--|--|--|--|--|--|--|--|--|--|--|---|--|--|--|--|--|--|--|--|--|--|--|--|--|--|--|---|--|--|--|--|--|--|--|--|--|--|--|--|--|--|--|---|--|--|--|--|--|--|--|--|--|--|--|--|--|--|--|---|--|--|--|--|--|--|--|--|--|--|--|--|--|--|--|---|--|--|--|--|--|--|--|--|--|--|--|--|--|--|--|---|--|--|--|--|--|--|--|--|--|--|--|--|--|--|--|---|--|--|--|--|--|--|--|--|--|--|--|--|--|--|--|---|--|--|--|--|--|--|--|--|--|--|--|--|--|--|--|---|--|--|--|--|--|--|--|--|--|--|--|--|--|--|--|---|--|--|--|--|--|--|--|--|--|--|--|--|--|--|--|---|--|--|--|--|--|--|--|--|--|--|--|--|--|--|--|---|--|--|--|--|--|--|--|--|--|--|--|--|--|--|--|---|--|--|--|--|--|--|--|--|--|--|--|--|--|--|--|---|--|--|--|--|--|--|--|--|--|--|--|--|--|--|--|---|--|--|--|--|--|--|--|--|--|--|--|--|--|--|--|---|--|--|--|--|--|--|--|--|--|--|--|--|--|--|--|---|--|--|--|--|--|--|--|--|--|--|--|--|--|--|--|---|--|--|--|--|--|--|--|--|--|--|--|--|--|--|--|---|--|--|--|--|--|--|--|--|--|--|--|--|--|--|--|---|--|--|--|--|--|--|--|--|--|--|--|--|--|--|--|---|--|--|--|--|--|--|--|--|--|--|--|--|--|--|--|---|--|--|--|--|--|--|--|--|--|--|--|--|--|--|--|---|--|--|--|--|--|--|--|--|--|--|--|--|--|--|--|---|--|--|--|--|--|--|--|--|--|--|--|--|--|--|--|---|--|--|--|--|--|--|--|--|--|--|--|--|--|--|--|---|--|--|--|--|--|--|--|--|--|--|--|--|--|--|--|---|--|--|--|--|--|--|--|--|--|--|--|--|--|--|--|---|--|--|--|--|--|--|--|--|--|--|--|--|--|--|--|---|--|--|--|--|--|--|--|--|--|--|--|--|--|--|--|---|--|--|--|--|--|--|--|--|--|--|--|--|--|--|--|---|--|--|--|--|--|--|--|--|--|--|--|--|--|--|--|---|--|--|--|--|--|--|--|--|--|--|--|--|--|--|--|---|--|--|--|--|--|--|--|--|--|--|--|--|--|--|--|---|--|--|--|--|--|--|--|--|--|--|--|--|--|--|--|---|--|--|--|--|--|--|--|--|--|--|--|--|--|--|--|---|--|--|--|--|--|--|--|--|--|--|--|--|--|--|--|---|--|--|--|--|--|--|--|--|--|--|--|--|--|--|--|---|--|--|--|--|--|--|--|--|--|--|--|--|--|--|--|---|--|--|--|--|--|--|--|--|--|--|--|--|--|--|--|---|--|--|--|--|--|--|--|--|--|--|--|--|--|--|--|---|--|--|--|--|--|--|--|--|--|--|--|--|--|--|--|---|--|--|--|--|--|--|--|--|--|--|--|--|--|--|--|---|--|--|--|--|--|--|--|--|--|--|--|--|--|--|--|---|--|--|--|--|--|--|--|--|--|--|--|--|--|--|--|---|--|--|--|--|--|--|--|--|--|--|--|--|--|--|--|---|--|--|--|--|--|--|--|--|--|--|--|--|--|--|--|---|--|--|--|--|--|--|--|--|--|--|--|--|--|--|--|---|--|--|--|--|--|--|--|--|--|--|--|--|--|--|--|---|--|--|--|--|--|--|--|--|--|--|--|--|--|--|--|---|--|--|--|--|--|--|--|--|--|--|--|--|--|--|--|---|--|--|--|--|--|--|--|--|--|--|--|--|--|--|--|---|--|--|--|--|--|--|--|--|--|--|--|--|--|--|--|---|--|--|--|--|--|--|--|--|--|--|--|--|--|--|--|---|--|--|--|--|--|--|--|--|--|--|--|--|--|--|--|---|--|--|--|--|--|--|--|--|--|--|--|--|--|--|--|---|--|--|--|--|--|--|--|--|--|--|--|--|--|--|--|---|--|--|--|--|--|--|--|--|--|--|--|--|--|--|--|---|--|--|--|--|--|--|--|--|--|--|--|--|--|--|--|---|--|--|--|--|--|--|--|--|--|--|--|--|--|--|--|---|--|--|--|--|--|--|--|--|--|--|--|--|--|--|--|---|--|--|--|--|--|--|--|--|--|--|--|--|--|--|--|---|--|--|--|--|--|--|--|--|--|--|--|--|--|--|--|---|--|--|--|--|--|--|--|--|--|--|--|--|--|--|--|---|--|--|--|--|--|--|--|--|--|--|--|--|--|--|--|---|--|--|--|--|--|--|--|--|--|--|--|--|--|--|--|---|--|--|--|--|--|--|--|--|--|--|--|--|--|--|--|---|--|--|--|--|--|--|--|--|--|--|--|--|--|--|--|---|--|--|--|--|--|--|--|--|--|--|--|--|--|--|--|---|--|--|--|--|--|--|--|--|--|--|--|--|--|--|--|---|--|--|--|--|--|--|--|--|--|--|--|--|--|--|--|---|--|--|--|--|--|--|--|--|--|--|--|--|--|--|--|---|--|--|--|--|--|--|--|--|--|--|--|--|--|--|--|---|--|--|--|--|--|--|--|--|--|--|--|--|--|--|--|---|--|--|--|--|--|--|--|--|--|--|--|--|--|--|--|---|--|--|--|--|--|--|--|--|--|--|--|--|--|--|--|---|--|--|--|--|--|--|--|--|--|--|--|--|--|--|--|---|--|--|--|--|--|--|--|--|--|--|--|--|--|--|--|---|--|--|--|--|--|--|--|--|--|--|--|--|--|--|--|---|--|--|--|--|--|--|--|--|--|--|--|--|--|--|--|---|--|--|--|--|--|--|--|--|--|--|--|--|--|--|--|---|--|--|--|--|--|--|--|--|--|--|--|--|--|--|--|---|--|--|--|--|--|--|--|--|--|--|--|--|--|--|--|---|--|--|--|--|--|--|--|--|--|--|--|--|--|--|--|---|--|--|--|--|--|--|--|--|--|--|--|--|--|--|--|---|--|--|--|--|--|--|--|--|--|--|--|--|--|--|--|---|--|--|--|--|--|--|--|--|--|--|--|--|--|--|--|---|--|--|--|--|--|--|--|--|--|--|--|--|--|--|--|---|--|--|--|--|--|--|--|--|--|--|--|--|--|--|--|---|--|--|--|--|--|--|--|--|--|--|--|--|--|--|--|---|--|--|--|--|--|--|--|--|--|--|--|--|--|--|--|---|--|--|--|--|--|--|--|--|--|--|--|--|--|--|--|---|--|--|--|--|--|--|--|--|--|--|--|--|--|--|--|---|--|--|--|--|--|--|--|--|--|--|--|--|--|--|--|---|--|--|--|--|--|--|--|--|--|--|--|--|--|--|--|---|--|--|--|--|--|--|--|--|--|--|--|--|--|--|--|---|--|--|--|--|--|--|--|--|--|--|--|--|--|--|--|---|--|--|--|--|--|--|--|--|--|--|--|--|--|--|--|---|--|--|--|--|--|--|--|--|--|--|--|--|--|--|--|---|--|--|--|--|--|--|--|--|--|--|--|--|--|--|--|---|--|--|--|--|--|--|--|--|--|--|--|--|--|--|--|---|--|--|--|--|--|--|--|--|--|--|--|--|--|--|--|---|--|--|--|--|--|--|--|--|--|--|--|--|--|--|--|---|--|--|--|--|--|--|--|--|--|--|--|--|--|--|--|---|--|--|--|--|--|--|--|--|--|--|--|--|--|--|--|---|--|--|--|--|--|--|--|--|--|--|--|--|--|--|--|---|--|--|--|--|--|--|--|--|--|--|--|--|--|--|--|---|--|--|--|--|--|--|--|--|--|--|--|--|--|--|--|---|--|--|--|--|--|--|--|--|--|--|--|--|--|--|--|---|--|--|--|--|--|--|--|--|--|--|--|--|--|--|--|---|--|--|--|--|--|--|--|--|--|--|--|--|--|--|--|---|--|--|--|--|--|--|--|--|--|--|--|--|--|--|--|---|--|--|--|--|--|--|--|--|--|--|--|--|--|--|--|---|--|--|--|--|--|--|--|--|--|--|--|--|--|--|--|---|--|--|--|--|--|--|--|--|--|--|--|--|--|--|--|---|--|--|--|--|--|--|--|--|--|--|--|--|--|--|--|---|--|--|--|--|--|--|--|--|--|--|--|--|--|--|--|---|--|--|--|--|--|--|--|--|--|--|--|--|--|--|--|---|--|--|--|--|--|--|--|--|--|--|--|--|--|--|--|---|--|--|--|--|--|--|--|--|--|--|--|--|--|--|--|---|--|--|--|--|--|--|--|--|--|--|--|--|--|--|--|---|--|--|--|--|--|--|--|--|--|--|--|--|--|--|--|---|--|--|--|--|--|--|--|--|--|--|--|--|--|--|--|---|--|--|--|--|--|--|--|--|--|--|--|--|--|--|--|---|--|--|--|--|--|--|--|--|--|--|--|--|--|--|--|---|--|--|--|--|--|--|--|--|--|--|--|--|--|--|--|---|--|--|--|--|--|--|--|--|--|--|--|--|--|--|--|---|--|--|--|--|--|--|--|--|--|--|--|--|--|--|--|---|--|--|--|--|--|--|--|--|--|--|--|--|--|--|--|---|--|--|--|--|--|--|--|--|--|--|--|--|--|--|--|---|--|--|--|--|--|--|--|--|--|--|--|--|--|--|--|---|--|--|--|--|--|--|--|--|--|--|--|--|--|--|--|---|--|--|--|--|--|--|--|--|--|--|--|--|--|--|--|---|--|--|--|--|--|--|--|--|--|--|--|--|--|--|--|---|--|--|--|--|--|--|--|--|--|--|--|--|--|--|--|---|--|--|--|--|--|--|--|--|--|--|--|--|--|--|--|---|--|--|--|--|--|--|--|--|--|--|--|--|--|--|--|---|--|--|--|--|--|--|--|--|--|--|--|--|--|--|--|---|--|--|--|--|--|--|--|--|--|--|--|--|--|--|--|---|--|--|--|--|--|--|--|--|--|--|--|--|--|--|--|---|--|--|--|--|--|--|--|--|--|--|--|--|--|--|--|---|--|--|--|--|--|--|--|--|--|--|--|--|--|--|--|---|--|--|--|--|--|--|--|--|--|--|--|--|--|--|--|---|--|--|--|--|--|--|--|--|--|--|--|--|--|--|--|---|--|--|--|--|--|--|--|--|--|--|--|--|--|--|--|---|--|--|--|--|--|--|--|--|--|--|--|--|--|--|--|---|--|--|--|--|--|--|--|--|--|--|--|--|--|--|--|---|--|--|--|--|--|--|--|--|--|--|--|--|--|--|--|---|--|--|--|--|--|--|--|--|--|--|--|--|--|--|--|---|--|--|--|--|--|--|--|--|--|--|--|--|--|--|--|---|--|--|--|--|--|--|--|--|--|--|--|--|--|--|--|---|--|--|--|--|--|--|--|--|--|--|--|--|--|--|--|---|--|--|--|--|--|--|--|--|--|--|--|--|--|--|--|---|--|--|--|--|--|--|--|--|--|--|--|--|--|--|--|---|--|--|--|--|--|--|--|--|--|--|--|--|--|--|--|---|--|--|--|--|--|--|--|--|--|--|--|--|--|--|--|---|--|--|--|--|--|--|--|--|--|--|--|--|--|--|--|---|--|--|--|--|--|--|--|--|--|--|--|--|--|--|--|---|--|--|--|--|--|--|--|--|--|--|--|--|--|--|--|---|--|--|--|--|--|--|--|--|--|--|--|--|--|--|--|---|--|--|--|--|--|--|--|--|--|--|--|--|--|--|--|---|--|--|--|--|--|--|--|--|--|--|--|--|--|--|--|---|--|--|--|--|--|--|--|--|--|--|--|--|--|--|--|---|--|--|--|--|--|--|--|--|--|--|--|--|--|--|--|---|--|--|--|--|--|--|--|--|--|--|--|--|--|--|--|---|--|--|--|--|--|--|--|--|--|--|--|--|--|--|--|---|--|--|--|--|--|--|--|--|--|--|--|--|--|--|--|---|--|--|--|--|--|--|--|--|--|--|--|--|--|--|--|---|--|--|--|--|--|--|--|--|--|--|--|--|--|--|--|---|--|--|--|--|--|--|--|--|--|--|--|--|--|--|--|---|--|--|--|--|--|--|--|--|--|--|--|--|--|--|--|---|--|--|--|--|--|--|--|--|--|--|--|--|--|--|--|---|--|--|--|--|--|--|--|--|--|--|--|--|--|--|--|---|--|--|--|--|--|--|--|--|--|--|--|--|--|--|--|---|--|--|--|--|--|--|--|--|--|--|--|--|--|--|--|---|--|--|--|--|--|--|--|--|--|--|--|--|--|--|--|---|--|--|--|--|--|--|--|--|--|--|--|--|--|--|--|---|--|--|--|--|--|--|--|--|--|--|--|--|--|--|--|---|--|--|--|--|--|--|--|--|--|--|--|--|--|--|--|---|--|--|--|--|--|--|--|--|--|--|--|--|--|--|--|---|--|--|--|--|--|--|--|--|--|--|--|--|--|--|--|---|--|--|--|--|--|--|--|--|--|--|--|--|--|--|--|---|--|--|--|--|--|--|--|--|--|--|--|--|--|--|--|---|--|--|--|--|--|--|--|--|--|--|--|--|--|--|--|---|--|--|--|--|--|--|--|--|--|--|--|--|--|--|--|---|--|--|--|--|--|--|--|--|--|--|--|--|--|--|--|---|--|--|--|--|--|--|--|--|--|--|--|--|--|--|--|---|--|--|--|--|--|--|--|--|--|--|--|--|--|--|--|---|--|--|--|--|--|--|--|--|--|--|--|--|--|--|--|---|--|--|--|--|--|--|--|--|--|--|--|--|--|--|--|---|--|--|--|--|--|--|--|--|--|--|--|--|--|--|--|---|--|--|--|--|--|--|--|--|--|--|--|--|--|--|--|---|--|--|--|--|--|--|--|--|--|--|--|--|--|--|--|---|--|--|--|--|--|--|--|--|--|--|--|--|--|--|--|---|--|--|--|--|--|--|--|--|--|--|--|--|--|--|--|---|--|--|--|--|--|--|--|--|--|--|--|--|--|--|--|---|--|--|--|--|--|--|--|--|--|--|--|--|--|--|--|---|--|--|--|--|--|--|--|--|--|--|--|--|--|--|--|---|--|--|--|--|--|--|--|--|--|--|--|--|--|--|--|---|--|--|--|--|--|--|--|--|--|--|--|--|--|--|--|---|--|--|--|--|--|--|--|--|--|--|--|--|--|--|--|---|--|--|--|--|--|--|--|--|--|--|--|--|--|--|--|---|--|--|--|--|--|--|--|--|--|--|--|--|--|--|--|---|--|--|--|--|--|--|--|--|--|--|--|--|--|--|--|---|--|--|--|--|--|--|--|--|--|--|--|--|--|--|--|---|--|--|--|--|--|--|--|--|--|--|--|--|--|--|--|---|--|--|--|--|--|--|--|--|--|--|--|--|--|--|--|---|--|--|--|--|--|--|--|--|--|--|--|--|--|--|--|---|--|--|--|--|--|--|--|--|--|--|--|--|--|--|--|---|--|--|--|--|--|--|--|--|--|--|--|--|--|--|--|---|--|--|--|--|--|--|--|--|--|--|--|--|--|--|--|---|--|--|--|--|--|--|--|--|--|--|--|--|--|--|--|---|--|--|--|--|--|--|--|--|--|--|--|--|--|--|--|---|--|--|--|--|--|--|--|--|--|--|--|--|--|--|--|---|--|--|--|--|--|--|--|--|--|--|--|--|--|--|--|---|--|--|--|--|--|--|--|--|--|--|--|--|--|--|--|---|--|--|--|--|--|--|--|--|--|--|--|--|--|--|--|---|--|--|--|--|--|--|--|--|--|--|--|--|--|--|--|---|--|--|--|--|--|--|--|--|--|--|--|--|--|--|--|---|--|--|--|--|--|--|--|--|--|--|--|--|--|--|--|---|--|--|--|--|--|--|--|--|--|--|--|--|--|--|--|---|--|--|--|--|--|--|--|--|--|--|--|--|--|--|--|---|--|--|--|--|--|--|--|--|--|--|--|--|--|--|--|---|--|--|--|--|--|--|--|--|--|--|--|--|--|--|--|---|--|--|--|--|--|--|--|--|--|--|--|--|--|--|--|---|--|--|--|--|--|--|--|--|--|--|--|--|--|--|--|---|--|--|--|--|--|--|--|--|--|--|--|--|--|--|--|---|--|--|--|--|--|--|--|--|--|--|--|--|--|--|--|---|--|--|--|--|--|--|--|--|--|--|--|--|--|--|--|---|--|--|--|--|--|--|--|--|--|--|--|--|--|--|--|---|--|--|--|--|--|--|--|--|--|--|--|--|--|--|--|---|--|--|--|--|--|--|--|--|--|--|--|--|--|--|--|---|--|--|--|--|--|--|--|--|--|--|--|--|--|--|--|---|--|--|--|--|--|--|--|--|--|--|--|--|--|--|--|---|--|--|--|--|--|--|--|--|--|--|--|--|--|--|--|---|--|--|--|--|--|--|--|--|--|--|--|--|--|--|--|---|--|--|--|--|--|--|--|--|--|--|--|--|--|--|--|---|--|--|--|--|--|--|--|--|--|--|--|--|--|--|--|---|--|--|--|--|--|--|--|--|--|--|--|--|--|--|--|---|--|--|--|--|--|--|--|--|--|--|--|--|--|--|--|---|--|--|--|--|--|--|--|--|--|--|--|--|--|--|--|---|--|--|--|--|--|--|--|--|--|--|--|--|--|--|--|---|--|--|--|--|--|--|--|--|--|--|--|--|--|--|--|---|--|--|--|--|--|--|--|--|--|--|--|--|--|--|--|---|--|--|--|--|--|--|--|--|--|--|--|--|--|--|--|---|--|--|--|--|--|--|--|--|--|--|--|--|--|--|--|---|--|--|--|--|--|--|--|--|--|--|--|--|--|--|--|---|--|--|--|--|--|--|--|--|--|--|--|--|--|--|--|---|--|--|--|--|--|--|--|--|--|--|--|--|--|--|--|---|--|--|--|--|--|--|--|--|--|--|--|--|--|--|--|---|--|--|--|--|--|--|--|--|--|--|--|--|--|--|--|---|--|--|--|--|--|--|--|--|--|--|--|--|--|--|--|---|--|--|--|--|--|--|--|--|--|--|--|--|--|--|--|---|--|--|--|--|--|--|--|--|--|--|--|--|--|--|--|---|--|--|--|--|--|--|--|--|--|--|--|--|--|--|--|---|--|--|--|--|--|--|--|--|--|--|--|--|--|--|--|---|--|--|--|--|--|--|--|--|--|--|--|--|--|--|--|---|--|--|--|--|--|--|--|--|--|--|--|--|--|--|--|---|--|--|--|--|--|--|--|--|--|--|--|--|--|--|--|---|--|--|--|--|--|--|--|--|--|--|--|--|--|--|--|---|--|--|--|--|--|--|--|--|--|--|--|--|--|--|--|---|--|--|--|--|--|--|--|--|--|--|--|--|--|--|--|---|--|--|--|--|--|--|--|--|--|--|--|--|--|--|--|---|--|--|--|--|--|--|--|--|--|--|--|--|--|--|--|---|--|--|--|--|--|--|--|--|--|--|--|--|--|--|--|---|--|--|--|--|--|--|--|--|--|--|--|--|--|--|--|---|--|--|--|--|--|--|--|--|--|--|--|--|--|--|--|---|--|--|--|--|--|--|--|--|--|--|--|--|--|--|--|---|--|--|--|--|--|--|--|--|--|--|--|--|--|--|--|---|--|--|--|--|--|--|--|--|--|--|--|--|--|--|--|---|--|--|--|--|--|--|--|--|--|--|--|--|--|--|--|---|--|--|--|--|--|--|--|--|--|--|--|--|--|--|--|---|--|--|--|--|--|--|--|--|--|--|--|--|--|--|--|---|--|--|--|--|--|--|--|--|--|--|--|--|--|--|--|---|--|--|--|--|--|--|--|--|--|--|--|--|--|--|--|---|--|--|--|--|--|--|--|--|--|--|--|--|--|--|--|---|--|--|--|--|--|--|--|--|--|--|--|--|--|--|--|---|--|--|--|--|--|--|--|--|--|--|--|--|--|--|--|---|--|--|--|--|--|--|--|--|--|--|--|--|--|--|--|---|--|--|--|--|--|--|--|--|--|--|--|--|--|--|--|---|--|--|--|--|--|--|--|--|--|--|--|--|--|--|--|---|--|--|--|--|--|--|--|--|--|--|--|--|--|--|--|---|--|--|--|--|--|--|--|--|--|--|--|--|--|--|--|---|--|--|--|--|--|--|--|--|--|--|--|--|--|--|--|---|--|--|--|--|--|--|--|--|--|--|--|--|--|--|--|---|--|--|--|--|--|--|--|--|--|--|--|--|--|--|--|---|--|--|--|--|--|--|--|--|--|--|--|--|--|--|--|---|--|--|--|--|--|--|--|--|--|--|--|--|--|--|--|---|--|--|--|--|--|--|--|--|--|--|--|--|--|--|--|---|--|--|--|--|--|--|--|--|--|--|--|--|--|--|--|---|--|--|--|--|--|--|--|--|--|--|--|--|--|--|--|---|--|--|--|--|--|--|--|--|--|--|--|--|--|--|--|---|--|--|--|--|--|--|--|--|--|--|--|--|--|--|--|---|--|--|--|--|--|--|--|--|--|--|--|--|--|--|--|---|--|--|--|--|--|--|--|--|--|--|--|--|--|--|--|---|--|--|--|--|--|--|--|--|--|--|--|--|--|--|--|---|--|--|--|--|--|--|--|--|--|--|--|--|--|--|--|---|--|--|--|--|--|--|--|--|--|--|--|--|--|--|--|---|--|--|--|--|--|--|--|--|--|--|--|--|--|--|--|---|--|--|--|--|--|--|--|--|--|--|--|--|--|--|--|---|--|--|--|--|--|--|--|--|--|--|--|--|--|--|--|---|--|--|--|--|--|--|--|--|--|--|--|--|--|--|--|---|--|--|--|--|--|--|--|--|--|--|--|--|--|--|--|---|--|--|--|--|--|--|--|--|--|--|--|--|--|--|--|---|--|--|--|--|--|--|--|--|--|--|--|--|--|--|--|---|--|--|--|--|--|--|--|--|--|--|--|--|--|--|--|---|--|--|--|--|--|--|--|--|--|--|--|--|--|--|--|---|--|--|--|--|--|--|--|--|--|--|--|--|--|--|--|---|--|--|--|--|--|--|--|--|--|--|--|--|--|--|--|---|--|--|--|--|--|--|--|--|--|--|--|--|--|--|--|---|--|--|--|--|--|--|--|--|--|--|--|--|--|--|--|---|--|--|--|--|--|--|--|--|--|--|--|--|--|--|--|---|--|--|--|--|--|--|--|--|--|--|--|--|--|--|--|---|--|--|--|--|--|--|--|--|--|--|--|--|--|--|--|---|--|--|--|--|--|--|--|--|--|--|--|--|--|--|--|---|--|--|--|--|--|--|--|--|--|--|--|--|--|--|--|---|--|--|--|--|--|--|--|--|--|--|--|--|--|--|--|---|--|--|--|--|--|--|--|--|--|--|--|--|--|--|--|---|--|--|--|--|--|--|--|--|--|--|--|--|--|--|--|---|--|--|--|--|--|--|--|--|--|--|--|--|--|--|--|---|--|--|--|--|--|--|--|--|--|--|--|--|--|--|--|---|--|--|--|--|--|--|--|--|--|--|--|--|--|--|--|---|--|--|--|--|--|--|--|--|--|--|--|--|--|--|--|---|--|--|--|--|--|--|--|--|--|--|--|--|--|--|--|---|--|--|--|--|--|--|--|--|--|--|--|--|--|--|--|---|--|--|--|--|--|--|--|--|--|--|--|--|--|--|--|---|--|--|--|--|--|--|--|--|--|--|--|--|--|--|--|---|--|--|--|--|--|--|--|--|--|--|--|--|--|--|--|---|--|--|--|--|--|--|--|--|--|--|--|--|--|--|--|---|--|--|--|--|--|--|--|--|--|--|--|--|--|--|--|---|--|--|--|--|--|--|--|--|--|--|--|--|--|--|--|---|--|--|--|--|--|--|--|--|--|--|--|--|--|--|--|---|--|--|--|--|--|--|--|--|--|--|--|--|--|--|--|---|--|--|--|--|--|--|--|--|--|--|--|--|--|--|--|---|--|--|--|--|--|--|--|--|--|--|--|--|--|--|--|---|--|--|--|--|--|--|--|--|--|--|--|--|--|--|--|---|--|--|--|--|--|--|--|--|--|--|--|--|--|--|--|---|--|--|--|--|--|--|--|--|--|--|--|--|--|--|--|---|--|--|--|--|--|--|--|--|--|--|--|--|--|--|--|---|--|--|--|--|--|--|--|--|--|--|--|--|--|--|--|---|--|--|--|--|--|--|--|--|--|--|--|--|--|--|--|---|--|--|--|--|--|--|--|--|--|--|--|--|--|--|--|---|--|--|--|--|--|--|--|--|--|--|--|--|--|--|--|---|--|--|--|--|--|--|--|--|--|--|--|--|--|--|--|---|--|--|--|--|--|--|--|--|--|--|--|--|--|--|--|---|--|--|--|--|--|--|--|--|--|--|--|--|--|--|--|---|--|--|--|--|--|--|--|--|--|--|--|--|--|--|--|---|--|--|--|--|--|--|--|--|--|--|--|--|--|--|--|---|--|--|--|--|--|--|--|--|--|--|--|--|--|--|--|---|--|--|--|--|--|--|--|--|--|--|--|--|--|--|--|---|--|--|--|--|--|--|--|--|--|--|--|--|--|--|--|---|--|--|--|--|--|--|--|--|--|--|--|--|--|--|--|---|--|--|--|--|--|--|--|--|--|--|--|--|--|--|--|---|--|--|--|--|--|--|--|--|--|--|--|--|--|--|--|---|--|--|--|--|--|--|--|--|--|--|--|--|--|--|--|---|--|--|--|--|--|--|--|--|--|--|--|--|--|--|--|---|--|--|--|--|--|--|--|--|--|--|--|--|--|--|--|---|--|--|--|--|--|--|--|--|--|--|--|--|--|--|--|---|--|--|--|--|--|--|--|--|--|--|--|--|--|--|--|---|--|--|--|--|--|--|--|--|--|--|--|--|--|--|--|---|--|--|--|--|--|--|--|--|--|--|--|--|--|--|--|---|--|--|--|--|--|--|--|--|--|--|--|--|--|--|--|---|--|--|--|--|--|--|--|--|--|--|--|--|--|--|--|---|--|--|--|--|--|--|--|--|--|--|--|--|--|--|--|---|--|--|--|--|--|--|--|--|--|--|--|--|--|--|--|---|--|--|--|--|--|--|--|--|--|--|--|--|--|--|--|---|--|--|--|--|--|--|--|--|--|--|--|--|--|--|--|---|--|--|--|--|--|--|--|--|--|--|--|--|--|--|--|---|--|--|--|--|--|--|--|--|--|--|--|--|--|--|--|---|--|--|--|--|--|--|--|--|--|--|--|--|--|--|--|---|--|--|--|--|--|--|--|--|--|--|--|--|--|--|--|---|--|--|--|--|--|--|--|--|--|--|--|--|--|--|--|---|--|--|--|--|--|--|--|--|--|--|--|--|--|--|--|---|--|--|--|--|--|--|--|--|--|--|--|--|--|--|--|---|--|--|--|--|--|--|--|--|--|--|--|--|--|--|--|---|--|--|--|--|--|--|--|--|--|--|--|--|--|--|--|---|--|--|--|--|--|--|--|--|--|--|--|--|--|--|--|---|--|--|--|--|--|--|--|--|--|--|--|--|--|--|--|---|--|--|--|--|--|--|--|--|--|--|--|--|--|--|--|---|--|--|--|--|--|--|--|--|--|--|--|--|--|--|--|---|--|--|--|--|--|--|--|--|--|--|--|--|--|--|--|---|--|--|--|--|--|--|--|--|--|--|--|--|--|--|--|---|--|--|--|--|--|--|--|--|--|--|--|--|--|--|--|---|--|--|--|--|--|--|--|--|--|--|--|--|--|--|--|---|--|--|--|--|--|--|--|--|--|--|--|--|--|--|--|---|--|--|--|--|--|--|--|--|--|--|--|--|--|--|--|---|--|--|--|--|--|--|--|--|--|--|--|--|--|--|--|---|--|--|--|--|--|--|--|--|--|--|--|--|--|--|--|---|--|--|--|--|--|--|--|--|--|--|--|--|--|--|--|---|--|--|--|--|--|--|--|--|--|--|--|--|--|--|--|---|--|--|--|--|--|--|--|--|--|--|--|--|--|--|--|---|--|--|--|--|--|--|--|--|--|--|--|--|--|--|--|---|--|--|--|--|--|--|--|--|--|--|--|--|--|--|--|---|--|--|--|--|--|--|--|--|--|--|--|--|--|--|--|---|--|--|--|--|--|--|--|--|--|--|--|--|--|--|--|---|--|--|--|--|--|--|--|--|--|--|--|--|--|--|--|---|--|--|--|--|--|--|--|--|--|--|--|--|--|--|--|---|--|--|--|--|--|--|--|--|--|--|--|--|--|--|--|---|--|--|--|--|--|--|--|--|--|--|--|--|--|--|--|---|--|--|--|--|--|--|--|--|--|--|--|--|--|--|--|---|--|--|--|--|--|--|--|--|--|--|--|--|--|--|--|---|--|--|--|--|--|--|--|--|--|--|--|--|--|--|--|---|--|--|--|--|--|--|--|--|--|--|--|--|--|--|--|---|--|--|--|--|--|--|--|--|--|--|--|--|--|--|--|---|--|--|--|--|--|--|--|--|--|--|--|--|--|--|--|---|--|--|--|--|--|--|--|--|--|--|--|--|--|--|--|---|--|--|--|--|--|--|--|--|--|--|--|--|--|--|--|---|--|--|--|--|--|--|--|--|--|--|--|--|--|--|--|---|--|--|--|--|--|--|--|--|--|--|--|--|--|--|--|---|--|--|--|--|--|--|--|--|--|--|--|--|--|--|--|---|--|--|--|--|--|--|--|--|--|--|--|--|--|--|--|---|--|--|--|--|--|--|--|--|--|--|--|--|--|--|--|---|--|--|--|--|--|--|--|--|--|--|--|--|--|--|--|---|--|--|--|--|--|--|--|--|--|--|--|--|--|--|--|---|--|--|--|--|--|--|--|--|--|--|--|--|--|--|--|---|--|--|--|--|--|--|--|--|--|--|--|--|--|--|--|---|--|--|--|--|--|--|--|--|--|--|--|--|--|--|--|---|--|--|--|--|--|--|--|--|--|--|--|--|--|--|--|---|--|--|--|--|--|--|--|--|--|--|--|--|--|--|--|---|--|--|--|--|--|--|--|--|--|--|--|--|--|--|--|---|--|--|--|--|--|--|--|--|--|--|--|--|--|--|--|---|--|--|--|--|--|--|--|--|--|--|--|--|--|--|--|---|--|--|--|--|--|--|--|--|--|--|--|--|--|--|--|---|--|--|--|--|--|--|--|--|--|--|--|--|--|--|--|---|--|--|--|--|--|--|--|--|--|--|--|--|--|--|--|---|--|--|--|--|--|--|--|--|--|--|--|--|--|--|--|---|--|--|--|--|--|--|--|--|--|--|--|--|--|--|--|---|--|--|--|--|--|--|--|--|--|--|--|--|--|--|--|---|--|--|--|--|--|--|--|--|--|--|--|--|--|--|--|---|--|--|--|--|--|--|--|--|--|--|--|--|--|--|--|---|--|--|--|--|--|--|--|--|--|--|--|--|--|--|--|---|--|--|--|--|--|--|--|--|--|--|--|--|--|--|--|---|--|--|--|--|--|--|--|--|--|--|--|--|--|--|--|---|--|--|--|--|--|--|--|--|--|--|--|--|--|--|--|---|--|--|--|--|--|--|--|--|--|--|--|--|--|--|--|---|--|--|--|--|--|--|--|--|--|--|--|--|--|--|--|---|--|--|--|--|--|--|--|--|--|--|--|--|--|--|--|---|--|--|--|--|--|--|--|--|--|--|--|--|--|--|--|---|--|--|--|--|--|--|--|--|--|--|--|--|--|--|--|---|--|--|--|--|--|--|--|--|--|--|--|--|--|--|--|---|--|--|--|--|--|--|--|--|--|--|--|--|--|--|--|---|--|--|--|--|--|--|--|--|--|--|--|--|--|--|--|
|----------|--|--|--|--|--|--|--|--|--|-----------|--|--|--|--|--|--|--|--|--|-----------|--|--|--|--|--|--|--|--|--|-----------|--|--|--|--|--|--|--|--|--|-----------|--|--|--|--|--|--|--|--|--|-----------|--|--|--|--|--|--|--|--|--|-----------|--|--|--|--|--|--|--|--|--|--|--|-----------|--|--|--|--|--|--|--|--|--|--|--|-----------|--|--|--|--|--|--|--|--|--|--|--|------------|--|--|--|--|--|--|--|--|--|--|--|--|--|------------|--|--|--|--|--|--|--|--|--|--|--|--|--|--|--|-----------|--|--|--|--|--|--|--|--|--|--|--|--|--|--|--|-----------|--|--|--|--|--|--|--|--|--|--|--|--|--|--|--|-----------|--|--|--|--|--|--|--|--|--|--|--|--|--|--|--|---|--|--|--|--|--|--|--|--|--|--|--|--|--|--|--|---|--|--|--|--|--|--|--|--|--|--|--|--|--|--|--|---|--|--|--|--|--|--|--|--|--|--|--|--|--|--|--|---|--|--|--|--|--|--|--|--|--|--|--|--|--|--|--|---|--|--|--|--|--|--|--|--|--|--|--|--|--|--|--|---|--|--|--|--|--|--|--|--|--|--|--|--|--|--|--|---|--|--|--|--|--|--|--|--|--|--|--|--|--|--|--|---|--|--|--|--|--|--|--|--|--|--|--|--|--|--|--|---|--|--|--|--|--|--|--|--|--|--|--|--|--|--|--|---|--|--|--|--|--|--|--|--|--|--|--|--|--|--|--|---|--|--|--|--|--|--|--|--|--|--|--|--|--|--|--|---|--|--|--|--|--|--|--|--|--|--|--|--|--|--|--|---|--|--|--|--|--|--|--|--|--|--|--|--|--|--|--|---|--|--|--|--|--|--|--|--|--|--|--|--|--|--|--|---|--|--|--|--|--|--|--|--|--|--|--|--|--|--|--|---|--|--|--|--|--|--|--|--|--|--|--|--|--|--|--|---|--|--|--|--|--|--|--|--|--|--|--|--|--|--|--|---|--|--|--|--|--|--|--|--|--|--|--|--|--|--|--|---|--|--|--|--|--|--|--|--|--|--|--|--|--|--|--|---|--|--|--|--|--|--|--|--|--|--|--|--|--|--|--|---|--|--|--|--|--|--|--|--|--|--|--|--|--|--|--|---|--|--|--|--|--|--|--|--|--|--|--|--|--|--|--|---|--|--|--|--|--|--|--|--|--|--|--|--|--|--|--|---|--|--|--|--|--|--|--|--|--|--|--|--|--|--|--|---|--|--|--|--|--|--|--|--|--|--|--|--|--|--|--|---|--|--|--|--|--|--|--|--|--|--|--|--|--|--|--|---|--|--|--|--|--|--|--|--|--|--|--|--|--|--|--|---|--|--|--|--|--|--|--|--|--|--|--|--|--|--|--|---|--|--|--|--|--|--|--|--|--|--|--|--|--|--|--|---|--|--|--|--|--|--|--|--|--|--|--|--|--|--|--|---|--|--|--|--|--|--|--|--|--|--|--|--|--|--|--|---|--|--|--|--|--|--|--|--|--|--|--|--|--|--|--|---|--|--|--|--|--|--|--|--|--|--|--|--|--|--|--|---|--|--|--|--|--|--|--|--|--|--|--|--|--|--|--|---|--|--|--|--|--|--|--|--|--|--|--|--|--|--|--|---|--|--|--|--|--|--|--|--|--|--|--|--|--|--|--|---|--|--|--|--|--|--|--|--|--|--|--|--|--|--|--|---|--|--|--|--|--|--|--|--|--|--|--|--|--|--|--|---|--|--|--|--|--|--|--|--|--|--|--|--|--|--|--|---|--|--|--|--|--|--|--|--|--|--|--|--|--|--|--|---|--|--|--|--|--|--|--|--|--|--|--|--|--|--|--|---|--|--|--|--|--|--|--|--|--|--|--|--|--|--|--|---|--|--|--|--|--|--|--|--|--|--|--|--|--|--|--|---|--|--|--|--|--|--|--|--|--|--|--|--|--|--|--|---|--|--|--|--|--|--|--|--|--|--|--|--|--|--|--|---|--|--|--|--|--|--|--|--|--|--|--|--|--|--|--|---|--|--|--|--|--|--|--|--|--|--|--|--|--|--|--|---|--|--|--|--|--|--|--|--|--|--|--|--|--|--|--|---|--|--|--|--|--|--|--|--|--|--|--|--|--|--|--|---|--|--|--|--|--|--|--|--|--|--|--|--|--|--|--|---|--|--|--|--|--|--|--|--|--|--|--|--|--|--|--|---|--|--|--|--|--|--|--|--|--|--|--|--|--|--|--|---|--|--|--|--|--|--|--|--|--|--|--|--|--|--|--|---|--|--|--|--|--|--|--|--|--|--|--|--|--|--|--|---|--|--|--|--|--|--|--|--|--|--|--|--|--|--|--|---|--|--|--|--|--|--|--|--|--|--|--|--|--|--|--|---|--|--|--|--|--|--|--|--|--|--|--|--|--|--|--|---|--|--|--|--|--|--|--|--|--|--|--|--|--|--|--|---|--|--|--|--|--|--|--|--|--|--|--|--|--|--|--|---|--|--|--|--|--|--|--|--|--|--|--|--|--|--|--|---|--|--|--|--|--|--|--|--|--|--|--|--|--|--|--|---|--|--|--|--|--|--|--|--|--|--|--|--|--|--|--|---|--|--|--|--|--|--|--|--|--|--|--|--|--|--|--|---|--|--|--|--|--|--|--|--|--|--|--|--|--|--|--|---|--|--|--|--|--|--|--|--|--|--|--|--|--|--|--|---|--|--|--|--|--|--|--|--|--|--|--|--|--|--|--|---|--|--|--|--|--|--|--|--|--|--|--|--|--|--|--|---|--|--|--|--|--|--|--|--|--|--|--|--|--|--|--|---|--|--|--|--|--|--|--|--|--|--|--|--|--|--|--|---|--|--|--|--|--|--|--|--|--|--|--|--|--|--|--|---|--|--|--|--|--|--|--|--|--|--|--|--|--|--|--|---|--|--|--|--|--|--|--|--|--|--|--|--|--|--|--|---|--|--|--|--|--|--|--|--|--|--|--|--|--|--|--|---|--|--|--|--|--|--|--|--|--|--|--|--|--|--|--|---|--|--|--|--|--|--|--|--|--|--|--|--|--|--|--|---|--|--|--|--|--|--|--|--|--|--|--|--|--|--|--|---|--|--|--|--|--|--|--|--|--|--|--|--|--|--|--|---|--|--|--|--|--|--|--|--|--|--|--|--|--|--|--|---|--|--|--|--|--|--|--|--|--|--|--|--|--|--|--|---|--|--|--|--|--|--|--|--|--|--|--|--|--|--|--|---|--|--|--|--|--|--|--|--|--|--|--|--|--|--|--|---|--|--|--|--|--|--|--|--|--|--|--|--|--|--|--|---|--|--|--|--|--|--|--|--|--|--|--|--|--|--|--|---|--|--|--|--|--|--|--|--|--|--|--|--|--|--|--|---|--|--|--|--|--|--|--|--|--|--|--|--|--|--|--|---|--|--|--|--|--|--|--|--|--|--|--|--|--|--|--|---|--|--|--|--|--|--|--|--|--|--|--|--|--|--|--|---|--|--|--|--|--|--|--|--|--|--|--|--|--|--|--|---|--|--|--|--|--|--|--|--|--|--|--|--|--|--|--|---|--|--|--|--|--|--|--|--|--|--|--|--|--|--|--|---|--|--|--|--|--|--|--|--|--|--|--|--|--|--|--|---|--|--|--|--|--|--|--|--|--|--|--|--|--|--|--|---|--|--|--|--|--|--|--|--|--|--|--|--|--|--|--|---|--|--|--|--|--|--|--|--|--|--|--|--|--|--|--|---|--|--|--|--|--|--|--|--|--|--|--|--|--|--|--|---|--|--|--|--|--|--|--|--|--|--|--|--|--|--|--|---|--|--|--|--|--|--|--|--|--|--|--|--|--|--|--|---|--|--|--|--|--|--|--|--|--|--|--|--|--|--|--|---|--|--|--|--|--|--|--|--|--|--|--|--|--|--|--|---|--|--|--|--|--|--|--|--|--|--|--|--|--|--|--|---|--|--|--|--|--|--|--|--|--|--|--|--|--|--|--|---|--|--|--|--|--|--|--|--|--|--|--|--|--|--|--|---|--|--|--|--|--|--|--|--|--|--|--|--|--|--|--|---|--|--|--|--|--|--|--|--|--|--|--|--|--|--|--|---|--|--|--|--|--|--|--|--|--|--|--|--|--|--|--|---|--|--|--|--|--|--|--|--|--|--|--|--|--|--|--|---|--|--|--|--|--|--|--|--|--|--|--|--|--|--|--|---|--|--|--|--|--|--|--|--|--|--|--|--|--|--|--|---|--|--|--|--|--|--|--|--|--|--|--|--|--|--|--|---|--|--|--|--|--|--|--|--|--|--|--|--|--|--|--|---|--|--|--|--|--|--|--|--|--|--|--|--|--|--|--|---|--|--|--|--|--|--|--|--|--|--|--|--|--|--|--|---|--|--|--|--|--|--|--|--|--|--|--|--|--|--|--|---|--|--|--|--|--|--|--|--|--|--|--|--|--|--|--|---|--|--|--|--|--|--|--|--|--|--|--|--|--|--|--|---|--|--|--|--|--|--|--|--|--|--|--|--|--|--|--|---|--|--|--|--|--|--|--|--|--|--|--|--|--|--|--|---|--|--|--|--|--|--|--|--|--|--|--|--|--|--|--|---|--|--|--|--|--|--|--|--|--|--|--|--|--|--|--|---|--|--|--|--|--|--|--|--|--|--|--|--|--|--|--|---|--|--|--|--|--|--|--|--|--|--|--|--|--|--|--|---|--|--|--|--|--|--|--|--|--|--|--|--|--|--|--|---|--|--|--|--|--|--|--|--|--|--|--|--|--|--|--|---|--|--|--|--|--|--|--|--|--|--|--|--|--|--|--|---|--|--|--|--|--|--|--|--|--|--|--|--|--|--|--|---|--|--|--|--|--|--|--|--|--|--|--|--|--|--|--|---|--|--|--|--|--|--|--|--|--|--|--|--|--|--|--|---|--|--|--|--|--|--|--|--|--|--|--|--|--|--|--|---|--|--|--|--|--|--|--|--|--|--|--|--|--|--|--|---|--|--|--|--|--|--|--|--|--|--|--|--|--|--|--|---|--|--|--|--|--|--|--|--|--|--|--|--|--|--|--|---|--|--|--|--|--|--|--|--|--|--|--|--|--|--|--|---|--|--|--|--|--|--|--|--|--|--|--|--|--|--|--|---|--|--|--|--|--|--|--|--|--|--|--|--|--|--|--|---|--|--|--|--|--|--|--|--|--|--|--|--|--|--|--|---|--|--|--|--|--|--|--|--|--|--|--|--|--|--|--|---|--|--|--|--|--|--|--|--|--|--|--|--|--|--|--|---|--|--|--|--|--|--|--|--|--|--|--|--|--|--|--|---|--|--|--|--|--|--|--|--|--|--|--|--|--|--|--|---|--|--|--|--|--|--|--|--|--|--|--|--|--|--|--|---|--|--|--|--|--|--|--|--|--|--|--|--|--|--|--|---|--|--|--|--|--|--|--|--|--|--|--|--|--|--|--|---|--|--|--|--|--|--|--|--|--|--|--|--|--|--|--|---|--|--|--|--|--|--|--|--|--|--|--|--|--|--|--|---|--|--|--|--|--|--|--|--|--|--|--|--|--|--|--|---|--|--|--|--|--|--|--|--|--|--|--|--|--|--|--|---|--|--|--|--|--|--|--|--|--|--|--|--|--|--|--|---|--|--|--|--|--|--|--|--|--|--|--|--|--|--|--|---|--|--|--|--|--|--|--|--|--|--|--|--|--|--|--|---|--|--|--|--|--|--|--|--|--|--|--|--|--|--|--|---|--|--|--|--|--|--|--|--|--|--|--|--|--|--|--|---|--|--|--|--|--|--|--|--|--|--|--|--|--|--|--|---|--|--|--|--|--|--|--|--|--|--|--|--|--|--|--|---|--|--|--|--|--|--|--|--|--|--|--|--|--|--|--|---|--|--|--|--|--|--|--|--|--|--|--|--|--|--|--|---|--|--|--|--|--|--|--|--|--|--|--|--|--|--|--|---|--|--|--|--|--|--|--|--|--|--|--|--|--|--|--|---|--|--|--|--|--|--|--|--|--|--|--|--|--|--|--|---|--|--|--|--|--|--|--|--|--|--|--|--|--|--|--|---|--|--|--|--|--|--|--|--|--|--|--|--|--|--|--|---|--|--|--|--|--|--|--|--|--|--|--|--|--|--|--|---|--|--|--|--|--|--|--|--|--|--|--|--|--|--|--|---|--|--|--|--|--|--|--|--|--|--|--|--|--|--|--|---|--|--|--|--|--|--|--|--|--|--|--|--|--|--|--|---|--|--|--|--|--|--|--|--|--|--|--|--|--|--|--|---|--|--|--|--|--|--|--|--|--|--|--|--|--|--|--|---|--|--|--|--|--|--|--|--|--|--|--|--|--|--|--|---|--|--|--|--|--|--|--|--|--|--|--|--|--|--|--|---|--|--|--|--|--|--|--|--|--|--|--|--|--|--|--|---|--|--|--|--|--|--|--|--|--|--|--|--|--|--|--|---|--|--|--|--|--|--|--|--|--|--|--|--|--|--|--|---|--|--|--|--|--|--|--|--|--|--|--|--|--|--|--|---|--|--|--|--|--|--|--|--|--|--|--|--|--|--|--|---|--|--|--|--|--|--|--|--|--|--|--|--|--|--|--|---|--|--|--|--|--|--|--|--|--|--|--|--|--|--|--|---|--|--|--|--|--|--|--|--|--|--|--|--|--|--|--|---|--|--|--|--|--|--|--|--|--|--|--|--|--|--|--|---|--|--|--|--|--|--|--|--|--|--|--|--|--|--|--|---|--|--|--|--|--|--|--|--|--|--|--|--|--|--|--|---|--|--|--|--|--|--|--|--|--|--|--|--|--|--|--|---|--|--|--|--|--|--|--|--|--|--|--|--|--|--|--|---|--|--|--|--|--|--|--|--|--|--|--|--|--|--|--|---|--|--|--|--|--|--|--|--|--|--|--|--|--|--|--|---|--|--|--|--|--|--|--|--|--|--|--|--|--|--|--|---|--|--|--|--|--|--|--|--|--|--|--|--|--|--|--|---|--|--|--|--|--|--|--|--|--|--|--|--|--|--|--|---|--|--|--|--|--|--|--|--|--|--|--|--|--|--|--|---|--|--|--|--|--|--|--|--|--|--|--|--|--|--|--|---|--|--|--|--|--|--|--|--|--|--|--|--|--|--|--|---|--|--|--|--|--|--|--|--|--|--|--|--|--|--|--|---|--|--|--|--|--|--|--|--|--|--|--|--|--|--|--|---|--|--|--|--|--|--|--|--|--|--|--|--|--|--|--|---|--|--|--|--|--|--|--|--|--|--|--|--|--|--|--|---|--|--|--|--|--|--|--|--|--|--|--|--|--|--|--|---|--|--|--|--|--|--|--|--|--|--|--|--|--|--|--|---|--|--|--|--|--|--|--|--|--|--|--|--|--|--|--|---|--|--|--|--|--|--|--|--|--|--|--|--|--|--|--|---|--|--|--|--|--|--|--|--|--|--|--|--|--|--|--|---|--|--|--|--|--|--|--|--|--|--|--|--|--|--|--|---|--|--|--|--|--|--|--|--|--|--|--|--|--|--|--|---|--|--|--|--|--|--|--|--|--|--|--|--|--|--|--|---|--|--|--|--|--|--|--|--|--|--|--|--|--|--|--|---|--|--|--|--|--|--|--|--|--|--|--|--|--|--|--|---|--|--|--|--|--|--|--|--|--|--|--|--|--|--|--|---|--|--|--|--|--|--|--|--|--|--|--|--|--|--|--|---|--|--|--|--|--|--|--|--|--|--|--|--|--|--|--|---|--|--|--|--|--|--|--|--|--|--|--|--|--|--|--|---|--|--|--|--|--|--|--|--|--|--|--|--|--|--|--|---|--|--|--|--|--|--|--|--|--|--|--|--|--|--|--|---|--|--|--|--|--|--|--|--|--|--|--|--|--|--|--|---|--|--|--|--|--|--|--|--|--|--|--|--|--|--|--|---|--|--|--|--|--|--|--|--|--|--|--|--|--|--|--|---|--|--|--|--|--|--|--|--|--|--|--|--|--|--|--|---|--|--|--|--|--|--|--|--|--|--|--|--|--|--|--|---|--|--|--|--|--|--|--|--|--|--|--|--|--|--|--|---|--|--|--|--|--|--|--|--|--|--|--|--|--|--|--|---|--|--|--|--|--|--|--|--|--|--|--|--|--|--|--|---|--|--|--|--|--|--|--|--|--|--|--|--|--|--|--|---|--|--|--|--|--|--|--|--|--|--|--|--|--|--|--|---|--|--|--|--|--|--|--|--|--|--|--|--|--|--|--|---|--|--|--|--|--|--|--|--|--|--|--|--|--|--|--|---|--|--|--|--|--|--|--|--|--|--|--|--|--|--|--|---|--|--|--|--|--|--|--|--|--|--|--|--|--|--|--|---|--|--|--|--|--|--|--|--|--|--|--|--|--|--|--|---|--|--|--|--|--|--|--|--|--|--|--|--|--|--|--|---|--|--|--|--|--|--|--|--|--|--|--|--|--|--|--|---|--|--|--|--|--|--|--|--|--|--|--|--|--|--|--|---|--|--|--|--|--|--|--|--|--|--|--|--|--|--|--|---|--|--|--|--|--|--|--|--|--|--|--|--|--|--|--|---|--|--|--|--|--|--|--|--|--|--|--|--|--|--|--|---|--|--|--|--|--|--|--|--|--|--|--|--|--|--|--|---|--|--|--|--|--|--|--|--|--|--|--|--|--|--|--|---|--|--|--|--|--|--|--|--|--|--|--|--|--|--|--|---|--|--|--|--|--|--|--|--|--|--|--|--|--|--|--|---|--|--|--|--|--|--|--|--|--|--|--|--|--|--|--|---|--|--|--|--|--|--|--|--|--|--|--|--|--|--|--|---|--|--|--|--|--|--|--|--|--|--|--|--|--|--|--|---|--|--|--|--|--|--|--|--|--|--|--|--|--|--|--|---|--|--|--|--|--|--|--|--|--|--|--|--|--|--|--|---|--|--|--|--|--|--|--|--|--|--|--|--|--|--|--|---|--|--|--|--|--|--|--|--|--|--|--|--|--|--|--|---|--|--|--|--|--|--|--|--|--|--|--|--|--|--|--|---|--|--|--|--|--|--|--|--|--|--|--|--|--|--|--|---|--|--|--|--|--|--|--|--|--|--|--|--|--|--|--|---|--|--|--|--|--|--|--|--|--|--|--|--|--|--|--|---|--|--|--|--|--|--|--|--|--|--|--|--|--|--|--|---|--|--|--|--|--|--|--|--|--|--|--|--|--|--|--|---|--|--|--|--|--|--|--|--|--|--|--|--|--|--|--|---|--|--|--|--|--|--|--|--|--|--|--|--|--|--|--|---|--|--|--|--|--|--|--|--|--|--|--|--|--|--|--|---|--|--|--|--|--|--|--|--|--|--|--|--|--|--|--|---|--|--|--|--|--|--|--|--|--|--|--|--|--|--|--|---|--|--|--|--|--|--|--|--|--|--|--|--|--|--|--|---|--|--|--|--|--|--|--|--|--|--|--|--|--|--|--|---|--|--|--|--|--|--|--|--|--|--|--|--|--|--|--|---|--|--|--|--|--|--|--|--|--|--|--|--|--|--|--|---|--|--|--|--|--|--|--|--|--|--|--|--|--|--|--|---|--|--|--|--|--|--|--|--|--|--|--|--|--|--|--|---|--|--|--|--|--|--|--|--|--|--|--|--|--|--|--|---|--|--|--|--|--|--|--|--|--|--|--|--|--|--|--|---|--|--|--|--|--|--|--|--|--|--|--|--|--|--|--|---|--|--|--|--|--|--|--|--|--|--|--|--|--|--|--|---|--|--|--|--|--|--|--|--|--|--|--|--|--|--|--|---|--|--|--|--|--|--|--|--|--|--|--|--|--|--|--|---|--|--|--|--|--|--|--|--|--|--|--|--|--|--|--|---|--|--|--|--|--|--|--|--|--|--|--|--|--|--|--|---|--|--|--|--|--|--|--|--|--|--|--|--|--|--|--|---|--|--|--|--|--|--|--|--|--|--|--|--|--|--|--|---|--|--|--|--|--|--|--|--|--|--|--|--|--|--|--|---|--|--|--|--|--|--|--|--|--|--|--|--|--|--|--|---|--|--|--|--|--|--|--|--|--|--|--|--|--|--|--|---|--|--|--|--|--|--|--|--|--|--|--|--|--|--|--|---|--|--|--|--|--|--|--|--|--|--|--|--|--|--|--|---|--|--|--|--|--|--|--|--|--|--|--|--|--|--|--|---|--|--|--|--|--|--|--|--|--|--|--|--|--|--|--|---|--|--|--|--|--|--|--|--|--|--|--|--|--|--|--|---|--|--|--|--|--|--|--|--|--|--|--|--|--|--|--|---|--|--|--|--|--|--|--|--|--|--|--|--|--|--|--|---|--|--|--|--|--|--|--|--|--|--|--|--|--|--|--|---|--|--|--|--|--|--|--|--|--|--|--|--|--|--|--|---|--|--|--|--|--|--|--|--|--|--|--|--|--|--|--|---|--|--|--|--|--|--|--|--|--|--|--|--|--|--|--|---|--|--|--|--|--|--|--|--|--|--|--|--|--|--|--|---|--|--|--|--|--|--|--|--|--|--|--|--|--|--|--|---|--|--|--|--|--|--|--|--|--|--|--|--|--|--|--|---|--|--|--|--|--|--|--|--|--|--|--|--|--|--|--|---|--|--|--|--|--|--|--|--|--|--|--|--|--|--|--|---|--|--|--|--|--|--|--|--|--|--|--|--|--|--|--|---|--|--|--|--|--|--|--|--|--|--|--|--|--|--|--|---|--|--|--|--|--|--|--|--|--|--|--|--|--|--|--|---|--|--|--|--|--|--|--|--|--|--|--|--|--|--|--|---|--|--|--|--|--|--|--|--|--|--|--|--|--|--|--|---|--|--|--|--|--|--|--|--|--|--|--|--|--|--|--|---|--|--|--|--|--|--|--|--|--|--|--|--|--|--|--|---|--|--|--|--|--|--|--|--|--|--|--|--|--|--|--|---|--|--|--|--|--|--|--|--|--|--|--|--|--|--|--|---|--|--|--|--|--|--|--|--|--|--|--|--|--|--|--|---|--|--|--|--|--|--|--|--|--|--|--|--|--|--|--|---|--|--|--|--|--|--|--|--|--|--|--|--|--|--|--|---|--|--|--|--|--|--|--|--|--|--|--|--|--|--|--|---|--|--|--|--|--|--|--|--|--|--|--|--|--|--|--|---|--|--|--|--|--|--|--|--|--|--|--|--|--|--|--|---|--|--|--|--|--|--|--|--|--|--|--|--|--|--|--|---|--|--|--|--|--|--|--|--|--|--|--|--|--|--|--|---|--|--|--|--|--|--|--|--|--|--|--|--|--|--|--|---|--|--|--|--|--|--|--|--|--|--|--|--|--|--|--|---|--|--|--|--|--|--|--|--|--|--|--|--|--|--|--|---|--|--|--|--|--|--|--|--|--|--|--|--|--|--|--|---|--|--|--|--|--|--|--|--|--|--|--|--|--|--|--|---|--|--|--|--|--|--|--|--|--|--|--|--|--|--|--|---|--|--|--|--|--|--|--|--|--|--|--|--|--|--|--|---|--|--|--|--|--|--|--|--|--|--|--|--|--|--|--|---|--|--|--|--|--|--|--|--|--|--|--|--|--|--|--|---|--|--|--|--|--|--|--|--|--|--|--|--|--|--|--|---|--|--|--|--|--|--|--|--|--|--|--|--|--|--|--|---|--|--|--|--|--|--|--|--|--|--|--|--|--|--|--|---|--|--|--|--|--|--|--|--|--|--|--|--|--|--|--|---|--|--|--|--|--|--|--|--|--|--|--|--|--|--|--|---|--|--|--|--|--|--|--|--|--|--|--|--|--|--|--|---|--|--|--|--|--|--|--|--|--|--|--|--|--|--|--|---|--|--|--|--|--|--|--|--|--|--|--|--|--|--|--|---|--|--|--|--|--|--|--|--|--|--|--|--|--|--|--|---|--|--|--|--|--|--|--|--|--|--|--|--|--|--|--|---|--|--|--|--|--|--|--|--|--|--|--|--|--|--|--|---|--|--|--|--|--|--|--|--|--|--|--|--|--|--|--|---|--|--|--|--|--|--|--|--|--|--|--|--|--|--|--|---|--|--|--|--|--|--|--|--|--|--|--|--|--|--|--|---|--|--|--|--|--|--|--|--|--|--|--|--|--|--|--|---|--|--|--|--|--|--|--|--|--|--|--|--|--|--|--|---|--|--|--|--|--|--|--|--|--|--|--|--|--|--|--|---|--|--|--|--|--|--|--|--|--|--|--|--|--|--|--|---|--|--|--|--|--|--|--|--|--|--|--|--|--|--|--|---|--|--|--|--|--|--|--|--|--|--|--|--|--|--|--|---|--|--|--|--|--|--|--|--|--|--|--|--|--|--|--|---|--|--|--|--|--|--|--|--|--|--|--|--|--|--|--|---|--|--|--|--|--|--|--|--|--|--|--|--|--|--|--|---|--|--|--|--|--|--|--|--|--|--|--|--|--|--|--|---|--|--|--|--|--|--|--|--|--|--|--|--|--|--|--|---|--|--|--|--|--|--|--|--|--|--|--|--|--|--|--|---|--|--|--|--|--|--|--|--|--|--|--|--|--|--|--|---|--|--|--|--|--|--|--|--|--|--|--|--|--|--|--|---|--|--|--|--|--|--|--|--|--|--|--|--|--|--|--|---|--|--|--|--|--|--|--|--|--|--|--|--|--|--|--|---|--|--|--|--|--|--|--|--|--|--|--|--|--|--|--|---|--|--|--|--|--|--|--|--|--|--|--|--|--|--|--|---|--|--|--|--|--|--|--|--|--|--|--|--|--|--|--|---|--|--|--|--|--|--|--|--|--|--|--|--|--|--|--|---|--|--|--|--|--|--|--|--|--|--|--|--|--|--|--|---|--|--|--|--|--|--|--|--|--|--|--|--|--|--|--|---|--|--|--|--|--|--|--|--|--|--|--|--|--|--|--|---|--|--|--|--|--|--|--|--|--|--|--|--|--|--|--|---|--|--|--|--|--|--|--|--|--|--|--|--|--|--|--|---|--|--|--|--|--|--|--|--|--|--|--|--|--|--|--|---|--|--|--|--|--|--|--|--|--|--|--|--|--|--|--|---|--|--|--|--|--|--|--|--|--|--|--|--|--|--|--|---|--|--|--|--|--|--|--|--|--|--|--|--|--|--|--|---|--|--|--|--|--|--|--|--|--|--|--|--|--|--|--|---|--|--|--|--|--|--|--|--|--|--|--|--|--|--|--|---|--|--|--|--|--|--|--|--|--|--|--|--|--|--|--|---|--|--|--|--|--|--|--|--|--|--|--|--|--|--|--|---|--|--|--|--|--|--|--|--|--|--|--|--|--|--|--|---|--|--|--|--|--|--|--|--|--|--|--|--|--|--|--|---|--|--|--|--|--|--|--|--|--|--|--|--|--|--|--|---|--|--|--|--|--|--|--|--|--|--|--|--|--|--|--|---|--|--|--|--|--|--|--|--|--|--|--|--|--|--|--|---|--|--|--|--|--|--|--|--|--|--|--|--|--|--|--|---|--|--|--|--|--|--|--|--|--|--|--|--|--|--|--|---|--|--|--|--|--|--|--|--|--|--|--|--|--|--|--|---|--|--|--|--|--|--|--|--|--|--|--|--|--|--|--|---|--|--|--|--|--|--|--|--|--|--|--|--|--|--|--|---|--|--|--|--|--|--|--|--|--|--|--|--|--|--|--|---|--|--|--|--|--|--|--|--|--|--|--|--|--|--|--|---|--|--|--|--|--|--|--|--|--|--|--|--|--|--|--|---|--|--|--|--|--|--|--|--|--|--|--|--|--|--|--|---|--|--|--|--|--|--|--|--|--|--|--|--|--|--|--|---|--|--|--|--|--|--|--|--|--|--|--|--|--|--|--|---|--|--|--|--|--|--|--|--|--|--|--|--|--|--|--|---|--|--|--|--|--|--|--|--|--|--|--|--|--|--|--|---|--|--|--|--|--|--|--|--|--|--|--|--|--|--|--|---|--|--|--|--|--|--|--|--|--|--|--|--|--|--|--|---|--|--|--|--|--|--|--|--|--|--|--|--|--|--|--|---|--|--|--|--|--|--|--|--|--|--|--|--|--|--|--|---|--|--|--|--|--|--|--|--|--|--|--|--|--|--|--|---|--|--|--|--|--|--|--|--|--|--|--|--|--|--|--|---|--|--|--|--|--|--|--|--|--|--|--|--|--|--|--|---|--|--|--|--|--|--|--|--|--|--|--|--|--|--|--|---|--|--|--|--|--|--|--|--|--|--|--|--|--|--|--|---|--|--|--|--|--|--|--|--|--|--|--|--|--|--|--|---|--|--|--|--|--|--|--|--|--|--|--|--|--|--|--|---|--|--|--|--|--|--|--|--|--|--|--|--|--|--|--|---|--|--|--|--|--|--|--|--|--|--|--|--|--|--|--|---|--|--|--|--|--|--|--|--|--|--|--|--|--|--|--|---|--|--|--|--|--|--|--|--|--|--|--|--|--|--|--|---|--|--|--|--|--|--|--|--|--|--|--|--|--|--|--|---|--|--|--|--|--|--|--|--|--|--|--|--|--|--|--|---|--|--|--|--|--|--|--|--|--|--|--|--|--|--|--|---|--|--|--|--|--|--|--|--|--|--|--|--|--|--|--|---|--|--|--|--|--|--|--|--|--|--|--|--|--|--|--|---|--|--|--|--|--|--|--|--|--|--|--|--|--|--|--|---|--|--|--|--|--|--|--|--|--|--|--|--|--|--|--|---|--|--|--|--|--|--|--|--|--|--|--|--|--|--|--|---|--|--|--|--|--|--|--|--|--|--|--|--|--|--|--|---|--|--|--|--|--|--|--|--|--|--|--|--|--|--|--|---|--|--|--|--|--|--|--|--|--|--|--|--|--|--|--|---|--|--|--|--|--|--|--|--|--|--|--|--|--|--|--|---|--|--|--|--|--|--|--|--|--|--|--|--|--|--|--|---|--|--|--|--|--|--|--|--|--|--|--|--|--|--|--|---|--|--|--|--|--|--|--|--|--|--|--|--|--|--|--|---|--|--|--|--|--|--|--|--|--|--|--|--|--|--|--|---|--|--|--|--|--|--|--|--|--|--|--|--|--|--|--|---|--|--|--|--|--|--|--|--|--|--|--|--|--|--|--|---|--|--|--|--|--|--|--|--|--|--|--|--|--|--|--|---|--|--|--|--|--|--|--|--|--|--|--|--|--|--|--|---|--|--|--|--|--|--|--|--|--|--|--|--|--|--|--|---|--|--|--|--|--|--|--|--|--|--|--|--|--|--|--|---|--|--|--|--|--|--|--|--|--|--|--|--|--|--|--|---|--|--|--|--|--|--|--|--|--|--|--|--|--|--|--|---|--|--|--|--|--|--|--|--|--|--|--|--|--|--|--|---|--|--|--|--|--|--|--|--|--|--|--|--|--|--|--|---|--|--|--|--|--|--|--|--|--|--|--|--|--|--|--|---|--|--|--|--|--|--|--|--|--|--|--|--|--|--|--|---|--|--|--|--|--|--|--|--|--|--|--|--|--|--|--|---|--|--|--|--|--|--|--|--|--|--|--|--|--|--|--|---|--|--|--|--|--|--|--|--|--|--|--|--|--|--|--|---|--|--|--|--|--|--|--|--|--|--|--|--|--|--|--|---|--|--|--|--|--|--|--|--|--|--|--|--|--|--|--|---|--|--|--|--|--|--|--|--|--|--|--|--|--|--|--|---|--|--|--|--|--|--|--|--|--|--|--|--|--|--|--|---|--|--|--|--|--|--|--|--|--|--|--|--|--|--|--|---|--|--|--|--|--|--|--|--|--|--|--|--|--|--|--|---|--|--|--|--|--|--|--|--|--|--|--|--|--|--|--|---|--|--|--|--|--|--|--|--|--|--|--|--|--|--|--|---|--|--|--|--|--|--|--|--|--|--|--|--|--|--|--|---|--|--|--|--|--|--|--|--|--|--|--|--|--|--|--|---|--|--|--|--|--|--|--|--|--|--|--|--|--|--|--|---|--|--|--|--|--|--|--|--|--|--|--|--|--|--|--|---|--|--|--|--|--|--|--|--|--|--|--|--|--|--|--|---|--|--|--|--|--|--|--|--|--|--|--|--|--|--|--|---|--|--|--|--|--|--|--|--|--|--|--|--|--|--|--|---|--|--|--|--|--|--|--|--|--|--|--|--|--|--|--|---|--|--|--|--|--|--|--|--|--|--|--|--|--|--|--|---|--|--|--|--|--|--|--|--|--|--|--|--|--|--|--|---|--|--|--|--|--|--|--|--|--|--|--|--|--|--|--|---|--|--|--|--|--|--|--|--|--|--|--|--|--|--|--|---|--|--|--|--|--|--|--|--|--|--|--|--|--|--|--|---|--|--|--|--|--|--|--|--|--|--|--|--|--|--|--|---|--|--|--|--|--|--|--|--|--|--|--|--|--|--|--|---|--|--|--|--|--|--|--|--|--|--|--|--|--|--|--|---|--|--|--|--|--|--|--|--|--|--|--|--|--|--|--|---|--|--|--|--|--|--|--|--|--|--|--|--|--|--|--|---|--|--|--|--|--|--|--|--|--|--|--|--|--|--|--|---|--|--|--|--|--|--|--|--|--|--|--|--|--|--|--|---|--|--|--|--|--|--|--|--|--|--|--|--|--|--|--|---|--|--|--|--|--|--|--|--|--|--|--|--|--|--|--|---|--|--|--|--|--|--|--|--|--|--|--|--|--|--|--|---|--|--|--|--|--|--|--|--|--|--|--|--|--|--|--|---|--|--|--|--|--|--|--|--|--|--|--|--|--|--|--|---|--|--|--|--|--|--|--|--|--|--|--|--|--|--|--|---|--|--|--|--|--|--|--|--|--|--|--|--|--|--|--|---|--|--|--|--|--|--|--|--|--|--|--|--|--|--|--|---|--|--|--|--|--|--|--|--|--|--|--|--|--|--|--|---|--|--|--|--|--|--|--|--|--|--|--|--|--|--|--|---|--|--|--|--|--|--|--|--|--|--|--|--|--|--|--|---|--|--|--|--|--|--|--|--|--|--|--|--|--|--|--|---|--|--|--|--|--|--|--|--|--|--|--|--|--|--|--|---|--|--|--|--|--|--|--|--|--|--|--|--|--|--|--|---|--|--|--|--|--|--|--|--|--|--|--|--|--|--|--|---|--|--|--|--|--|--|--|--|--|--|--|--|--|--|--|---|--|--|--|--|--|--|--|--|--|--|--|--|--|--|--|---|--|--|--|--|--|--|--|--|--|--|--|--|--|--|--|---|--|--|--|--|--|--|--|--|--|--|--|--|--|--|--|---|--|--|--|--|--|--|--|--|--|--|--|--|--|--|--|---|--|--|--|--|--|--|--|--|--|--|--|--|--|--|--|---|--|--|--|--|--|--|--|--|--|--|--|--|--|--|--|---|--|--|--|--|--|--|--|--|--|--|--|--|--|--|--|---|--|--|--|--|--|--|--|--|--|--|--|--|--|--|--|---|--|--|--|--|--|--|--|--|--|--|--|--|--|--|--|---|--|--|--|--|--|--|--|--|--|--|--|--|--|--|--|---|--|--|--|--|--|--|--|--|--|--|--|--|--|--|--|---|--|--|--|--|--|--|--|--|--|--|--|--|--|--|--|---|--|--|--|--|--|--|--|--|--|--|--|--|--|--|--|---|--|--|--|--|--|--|--|--|--|--|--|--|--|--|--|---|--|--|--|--|--|--|--|--|--|--|--|--|--|--|--|---|--|--|--|--|--|--|--|--|--|--|--|--|--|--|--|---|--|--|--|--|--|--|--|--|--|--|--|--|--|--|--|---|--|--|--|--|--|--|--|--|--|--|--|--|--|--|--|---|--|--|--|--|--|--|--|--|--|--|--|--|--|--|--|---|--|--|--|--|--|--|--|--|--|--|--|--|--|--|--|---|--|--|--|--|--|--|--|--|--|--|--|--|--|--|--|---|--|--|--|--|--|--|--|--|--|--|--|--|--|--|--|---|--|--|--|--|--|--|--|--|--|--|--|--|--|--|--|---|--|--|--|--|--|--|--|--|--|--|--|--|--|--|--|---|--|--|--|--|--|--|--|--|--|--|--|--|--|--|--|---|--|--|--|--|--|--|--|--|--|--|--|--|--|--|--|---|--|--|--|--|--|--|--|--|--|--|--|--|--|--|--|---|--|--|--|--|--|--|--|--|--|--|--|--|--|--|--|---|--|--|--|--|--|--|--|--|--|--|--|--|--|--|--|---|--|--|--|--|--|--|--|--|--|--|--|--|--|--|--|---|--|--|--|--|--|--|--|--|--|--|--|--|--|--|--|---|--|--|--|--|--|--|--|--|--|--|--|--|--|--|--|---|--|--|--|--|--|--|--|--|--|--|--|--|--|--|--|---|--|--|--|--|--|--|--|--|--|--|--|--|--|--|--|---|--|--|--|--|--|--|--|--|--|--|--|--|--|--|--|---|--|--|--|--|--|--|--|--|--|--|--|--|--|--|--|---|--|--|--|--|--|--|--|--|--|--|--|--|--|--|--|---|--|--|--|--|--|--|--|--|--|--|--|--|--|--|--|---|--|--|--|--|--|--|--|--|--|--|--|--|--|--|--|---|--|--|--|--|--|--|--|--|--|--|--|--|--|--|--|---|--|--|--|--|--|--|--|--|--|--|--|--|--|--|--|---|--|--|--|--|--|--|--|--|--|--|--|--|--|--|--|---|--|--|--|--|--|--|--|--|--|--|--|--|--|--|--|---|--|--|--|--|--|--|--|--|--|--|--|--|--|--|--|---|--|--|--|--|--|--|--|--|--|--|--|--|--|--|--|---|--|--|--|--|--|--|--|--|--|--|--|--|--|--|--|---|--|--|--|--|--|--|--|--|--|--|--|--|--|--|--|---|--|--|--|--|--|--|--|--|--|--|--|--|--|--|--|

Calculated results (Leung): T, fv and Rg vs HAB ( $\phi = 2.2$ )

Calculated results (Leung): T, fv and Rg vs HAB ( $\phi = 2.35$ )

[illegible]

Calculated results (Liu): T, fv and Rg vs HAB ( $\phi = 2.0$ )

Calculated results (Liu): T, fv and Rg vs HAB ( $\phi = 2.1$ )

[illegible]

Calculated results (Liu): T, fv and Rg vs HAB ( $\phi = 2.2$ )

Calculated results (Liu: T, fv and Rg vs HAB (φ = 2.35

| 1.051677 |  |  |  |  |  |  |  |  |  | 1.081722 |  |  |  |  |  |  |  |  |  | 6.040074 |  |  |  |  |  |  |  |  |  | 7.777526 |  |  |  |  |  |  |  |  |  | 7.605177 |  |  |  |  |  |  |  |  |  | 8.727951 |  |  |  |  |  |  |  |  |  | 6.040074 |  |  |  |  |  |  |  |  |  |  |  | 4.141005 |  |  |  |  |  |  |  |  |  |  |  | 10.016799 |  |  |  |  |  |  |  |  |  |  |  |  |  |  |  | 10.016799 |  |  |  |  |  |  |  |  |  |  |  |  |  |  |  | 10.016799 |  |  |  |  |  |  |  |  |  |  |  |  |  |  |  | 10.016799 |  |  |  |  |  |  |  |  |  |  |  |  |  |  |  | 10.016799 |  |  |  |  |  |  |  |  |  |  |  |  |  |  |  | 10.016799 |  |  |  |  |  |  |  |  |  |  |  |  |  |  |  | 10.016799 |  |  |  |  |  |  |  |  |  |  |  |  |  |  |  | 10.016799 |  |  |  |  |  |  |  |  |  |  |  |  |  |  |  | 10.016799 |  |  |  |  |  |  |  |  |  |  |  |  |  |  |  | 10.016799 |  |  |  |  |  |  |  |  |  |  |  |  |  |  |  | 10.016799 |  |  |  |  |  |  |  |  |  |  |  |  |  |  |  | 10.016799 |  |  |  |  |  |  |  |  |  |  |  |  |  |  |  | 10.016799 |  |  |  |  |  |  |  |  |  |  |  |  |  |  |  | 10.016799 |  |  |  |  |  |  |  |  |  |  |  |  |  |  |  | 10.016799 |  |  |  |  |  |  |  |  |  |  |  |  |  |  |  | 10.016799 |  |  |  |  |  |  |  |  |  |  |  |  |  |  |  | 10.016799 |  |  |  |  |  |  |  |  |  |  |  |  |  |  |  | 10.016799 |  |  |  |  |  |  |  |  |  |  |  |  |  |  |  | 10.016799 |  |  |  |  |  |  |  |  |  |  |  |  |  |  |  | 10.016799 |  |  |  |  |  |  |  |  |  |  |  |  |  |  |  | 10.016799 |  |  |  |  |  |  |  |  |  |  |  |  |  |  |  | 10.016799 |  |  |  |  |  |  |  |  |  |  |  |  |  |  |  | 10.016799 |  |  |  |  |  |  |  |  |  |  |  |  |  |  |  | 10.016799 |  |  |  |  |  |  |  |  |  |  |  |  |  |  |  | 10.016799 |  |  |  |  |  |  |  |  |  |  |  |  |  |  |  | 10.016799 |  |  |  |  |  |  |  |  |  |  |  |  |  |  |  | 10.016799 |  |  |  |  |  |  |  |  |  |  |  |  |  |  |  | 10.016799 |  |  |  |  |  |  |  |  |  |  |  |  |  |  |  | 10.016799 |  |  |  |  |  |  |  |  |  |  |  |  |  |  |  | 10.016799 |  |  |  |  |  |  |  |  |  |  |  |  |  |  |  | 10.016799 |  |  |  |  |  |  |  |  |  |  |  |  |  |  |  | 10.016799 |  |  |  |  |  |  |  |  |  |  |  |  |  |  |  | 10.016799 |  |  |  |  |  |  |  |  |  |  |  |  |  |  |  | 10.016799 |  |  |  |  |  |  |  |  |  |  |  |  |  |  |  | 10.016799 |  |  |  |  |  |  |  |  |  |  |  |  |  |  |  | 10.016799 |  |  |  |  |  |  |  |  |  |  |  |  |  |  |  | 10.016799 |  |  |  |  |  |  |  |  |  |  |  |  |  |  |  | 10.016799 |  |  |  |  |  |  |  |  |  |  |  |  |  |  |  | 10.016799 |  |  |  |  |  |  |  |  |  |  |  |  |  |  |  | 10.016799 |  |  |  |  |  |  |  |  |  |  |  |  |  |  |  | 10.016799 |  |  |  |  |  |  |  |  |  |  |  |  |  |  |  | 10.016799 |  |  |  |  |  |  |  |  |  |  |  |  |  |  |  | 10.016799 |  |  |  |  |  |  |  |  |  |  |  |  |  |  |  | 10.016799 |  |  |  |  |  |  |  |  |  |  |  |  |  |  |  | 10.016799 |  |  |  |  |  |  |  |  |  |  |  |  |  |  |  | 10.016799 |  |  |  |  |  |  |  |  |  |  |  |  |  |  |  | 10.016799 |  |  |  |  |  |  |  |  |  |  |  |  |  |  |  | 10.016799 |  |  |  |  |  |  |  |  |  |  |  |  |  |  |  | 10.016799 |  |  |  |  |  |  |  |  |  |  |  |  |  |  |  | 10.016799 |  |  |  |  |  |  |  |  |  |  |  |  |  |  |  | 10.016799 |  |  |  |  |  |  |  |  |  |  |  |  |  |  |  | 10.016799 |  |  |  |  |  |  |  |  |  |  |  |  |  |  |  | 10.016799 |  |  |  |  |  |  |  |  |  |  |  |  |  |  |  | 10.016799 |  |  |  |  |  |  |  |  |  |  |  |  |  |  |  | 10.016799 |  |  |  |  |  |  |  |  |  |  |  |  |  |  |  | 10.016799 |  |  |  |  |  |  |  |  |  |  |  |  |  |  |  | 10.016799 |  |  |  |  |  |  |  |  |  |  |  |  |  |  |  | 10.016799 |  |  |  |  |  |  |  |  |  |  |  |  |  |  |  | 10.016799 |  |  |  |  |  |  |  |  |  |  |  |  |  |  |  | 10.016799 |  |  |  |  |  |  |  |  |  |  |  |  |  |  |  | 10.016799 |  |  |  |  |  |  |  |  |  |  |  |  |  |  |  | 10.016799 |  |  |  |  |  |  |  |  |  |  |  |  |  |  |  | 10.016799 |  |  |  |  |  |  |  |  |  |  |  |  |  |  |  | 10.016799 |  |  |  |  |  |  |  |  |  |  |  |  |  |  |  | 10.016799 |  |  |  |  |  |  |  |  |  |  |  |  |  |  |  | 10.016799 |  |  |  |  |  |  |  |  |  |  |  |  |  |  |  | 10.016799 |  |  |  |  |  |  |  |  |  |  |  |  |  |  |  | 10.016799 |  |  |  |  |  |  |  |  |  |  |  |  |  |  |  | 10.016799 |  |  |  |  |  |  |  |  |  |  |  |  |  |  |  | 10.016799 |  |  |  |  |  |  |  |  |  |  |  |  |  |  |  | 10.016799 |  |  |  |  |  |  |  |  |  |  |  |  |  |  |  | 10.016799 |  |  |  |  |  |  |  |  |  |  |  |  |  |  |  | 10.016799 |  |  |  |  |  |  |  |  |  |  |  |  |  |  |  | 10.016799 |  |  |  |  |  |  |  |  |  |  |  |  |  |  |  | 10.016799 |  |  |  |  |  |  |  |  |  |  |  |  |  |  |  | 10.016799 |  |  |  |  |  |  |  |  |  |  |  |  |  |  |  | 10.016799 |  |  |  |  |  |  |  |  |  |  |  |  |  |  |  | 10.016799 |  |  |  |  |  |  |  |  |  |  |  |  |  |  |  | 10.016799 |  |  |  |  |  |  |  |  |  |  |  |  |  |  |  | 10.016799 |  |  |  |  |  |  |  |  |  |  |  |  |  |  |  | 10.016799 |  |  |  |  |  |  |  |  |  |  |  |  |  |  |  | 10.016799 |  |  |  |  |  |  |  |  |  |  |  |  |  |  |  | 10.016799 |  |  |  |  |  |  |  |  |  |  |  |  |  |  |  | 10.016799 |  |  |  |  |  |  |  |  |  |  |  |  |  |  |  | 10.016799 |  |  |  |  |  |  |  |  |  |  |  |  |  |  |  | 10.016799 |  |  |  |  |  |  |  |  |  |  |  |  |  |  |  | 10.016799 |  |  |  |  |  |  |  |  |  |  |  |  |  |  |  | 10.016799 |  |  |  |  |  |  |  |  |  |  |  |  |  |  |  | 10.016799 |  |  |  |  |  |  |  |  |  |  |  |  |  |  |  | 10.016799 |  |  |  |  |  |  |  |  |  |  |  |  |  |  |  | 10.016799 |  |  |  |  |  |  |  |  |  |  |  |  |  |  |  | 10.016799 |  |  |  |  |  |  |  |  |  |  |  |  |  |  |  | 10.016799 |  |  |  |  |  |  |  |  |  |  |  |  |  |  |  | 10.016799 |  |  |  |  |  |  |  |  |  |  |  |  |  |  |  | 10.016799 |  |  |  |  |  |  |  |  |  |  |  |  |  |  |  | 10.016799 |  |  |  |  |  |  |  |  |  |  |  |  |  |  |  | 10.016799 |  |  |  |  |  |  |  |  |  |  |  |  |  |  |  | 10.016799 |  |  |  |  |  |  |  |  |  |  |  |  |  |  |  | 10.016799 |  |  |  |  |  |  |  |  |  |  |  |  |  |  |  | 10.016799 |  |  |  |  |  |  |  |  |  |  |  |  |  |  |  | 10.016799 |  |  |  |  |  |  |  |  |  |  |  |  |  |  |  | 10.016799 |  |  |  |  |  |  |  |  |  |  |  |  |  |  |  | 10.016799 |  |  |  |  |  |  |  |  |  |  |  |  |  |  |  | 10.016799 |  |  |  |  |  |  |  |  |  |  |  |  |  |  |  | 10.016799 |  |  |  |  |  |  |  |  |  |  |  |  |  |  |  | 10.016799 |  |  |  |  |  |  |  |  |  |  |  |  |  |  |  | 10.016799 |  |  |  |  |  |  |  |  |  |  |  |  |  |  |  | 10.016799 |  |  |  |  |  |  |  |  |  |  |  |  |  |  |  | 10.016799 |  |  |  |  |  |  |  |  |  |  |  |  |  |  |  | 10.016799 |  |  |  |  |  |  |  |  |  |  |  |  |  |  |  | 10.016799 |  |  |  |  |  |  |  |  |  |  |  |  |  |  |  | 10.016799 |  |  |  |  |  |  |  |  |  |  |  |  |  |  |  | 10.016799 |  |  |  |  |  |  |  |  |  |  |  |  |  |  |  | 10.016799 |  |  |  |  |  |  |  |  |  |  |  |  |  |  |  | 10.016799 |  |  |  |  |  |  |  |  |  |  |  |  |  |  |  | 10.016799 |  |  |  |  |  |  |  |  |  |  |  |  |  |  |  | 10.016799 |  |  |  |  |  |  |  |  |  |  |  |  |  |  |  | 10.016799 |  |  |  |  |  |  |  |  |  |  |  |  |  |  |  | 10.016799 |  |  |  |  |  |  |  |  |  |  |  |  |  |  |  | 10.016799 |  |  |  |  |  |  |  |  |  |  |  |  |  |  |  | 10.016799 |  |  |  |  |  |  |  |  |  |  |  |  |  |  |  | 10.016799 |  |  |  |  |  |  |  |  |  |  |  |  |  |  |  | 10.016799 |  |  |  |  |  |  |  |  |  |  |  |  |  |  |  | 10.016799 |  |  |  |  |  |  |  |  |  |  |  |  |  |  |  | 10.016799 |  |  |  |  |  |  |  |  |  |  |  |  |  |  |  | 10.016799 |  |  |  |  |  |  |  |  |  |  |  |  |  |  |  | 10.016799 |  |  |  |  |  |  |  |  |  |  |  |  |  |  |  | 10.016799 |  |  |  |  |  |  |  |  |  |  |  |  |  |  |  | 10.016799 |  |  |  |  |  |  |  |  |  |  |  |  |  |  |  | 10.016799 |  |  |  |  |  |  |  |  |  |  |  |  |  |  |  | 10.016799 |  |  |  |  |  |  |  |  |  |  |  |  |  |  |  | 10.016799 |  |  |  |  |  |  |  |  |  |  |  |  |  |  |  | 10.016799 |  |  |  |  |  |  |  |  |  |  |  |  |  |  |  | 10.016799 |  |  |  |  |  |  |  |  |  |  |  |  |  |  |  | 10.016799 |  |  |  |  |  |  |  |  |  |  |  |  |  |  |  | 10.016799 |  |  |  |  |  |  |  |  |  |  |  |  |  |  |  | 10.016799 |  |  |  |  |  |  |  |  |  |  |  |  |  |  |  | 10.016799 |  |  |  |  |  |  |  |  |  |  |  |  |  |  |  | 10.016799 |  |  |  |  |  |  |  |  |  |  |  |  |  |  |  | 10.016799 |  |  |  |  |  |  |  |  |  |  |  |  |  |  |  | 10.016799 |  |  |  |  |  |  |  |  |  |  |  |  |  |  |  | 10.016799 |  |  |  |  |  |  |  |  |  |  |  |  |  |  |  | 10.016799 |  |  |  |  |  |  |  |  |  |  |  |  |  |  |  | 10.016799 |  |  |  |  |  |  |  |  |  |  |  |  |  |  |  | 10.016799 |  |  |  |  |  |  |  |  |  |  |  |  |  |  |  | 10.016799 |  |  |  |  |  |  |  |  |  |  |  |  |  |  |  | 10.016799 |  |  |  |  |  |  |  |  |  |  |  |  |  |  |  | 10.016799 |  |  |  |  |  |  |  |  |  |  |  |  |  |  |  | 10.016799 |  |  |  |  |  |  |  |  |  |  |  |  |  |  |  | 10.016799 |  |  |  |  |  |  |  |  |  |  |  |  |  |  |  | 10.016799 |  |  |  |  |  |  |  |  |  |  |  |  |  |  |  | 10.016799 |  |  |  |  |  |  |  |  |  |  |  |  |  |  |  | 10.016799 |  |  |  |  |  |  |  |  |  |  |  |  |  |  |  | 10.016799 |  |  |  |  |  |  |  |  |  |  |  |  |  |  |  | 10.016799 |  |  |  |  |  |  |  |  |  |  |  |  |  |  |  | 10.016799 |  |  |  |  |  |  |  |  |  |  |  |  |  |  |  | 10.016799 |  |  |  |  |  |  |  |  |  |  |  |  |  |  |  | 10.016799 |  |  |  |  |  |  |  |  |  |  |  |  |  |  |  | 10.016799 |  |  |  |  |  |  |  |  |  |  |  |  |  |  |  | 10.016799 |  |  |  |  |  |  |  |  |  |  |  |  |  |  |  | 10.016799 |  |  |  |  |  |  |  |  |  |  |  |  |  |  |  | 10.016799 |  |  |  |  |  |  |  |  |  |  |  |  |  |  |  | 10.016799 |  |  |  |  |  |  |  |  |  |  |  |  |  |  |  | 10.016799 |  |  |  |  |  |  |  |  |  |  |  |  |  |  |  | 10.016799 |  |  |  |  |  |  |  |  |  |  |  |  |  |  |  | 10.016799 |  |  |  |  |  |  |  |  |  |  |  |  |  |  |  | 10.016799 |  |  |  |  |  |  |  |  |  |  |  |  |  |  |  | 10.016799 |  |  |  |  |  |  |  |  |  |  |  |  |  |  |  | 10.016799 |  |  |  |  |  |  |  |  |  |  |  |  |  |  |  | 10.016799 |  |  |  |  |  |  |  |  |  |  |  |  |  |  |  | 10.016799 |  |  |  |  |  |  |  |  |  |  |  |  |  |  |  | 10.016799 |  |  |  |  |  |  |  |  |  |  |  |  |  |  |  | 10.016799 |  |  |  |  |  |  |  |  |  |  |  |  |  |  |  | 10.016799 |  |  |  |  |  |  |  |  |  |  |  |  |  |  |  | 10.016799 |  |  |  |  |  |  |  |  |  |  |  |  |  |  |  | 10.016799 |  |  |  |  |  |  |  |  |  |  |  |  |  |  |  | 10.016799 |  |  |  |  |  |  |  |  |  |  |  |  |  |  |  | 10.016799 |  |  |  |  |  |  |  |  |  |  |  |  |  |  |  | 10.016799 |  |  |  |  |  |  |  |  |  |  |  |  |  |  |  | 10.016799 |  |  |  |  |  |  |  |  |  |  |  |  |  |  |  | 10.016799 |  |  |  |  |  |  |  |  |  |  |  |  |  |  |  | 10.016799 |  |  |  |  |  |  |  |  |  |  |  |  |  |  |  | 10.016799 |  |  |  |  |  |  |  |  |  |  |  |  |  |  |  | 10.016799 |  |  |  |  |  |  |  |  |  |  |  |  |  |  |  | 10.016799 |  |  |  |  |  |  |  |  |  |  |  |  |  |  |  | 10.016799 |  |  |  |  |  |  |  |  |  |  |  |  |  |  |  | 10.016799 |  |  |  |  |  |  |  |  |  |  |  |  |  |  |  | 10.016799 |  |  |  |  |  |  |  |  |  |  |  |  |  |  |  | 10.016799 |  |  |  |  |  |  |  |  |  |  |  |  |  |  |  | 10.016799 |  |  |  |  |  |  |  |  |  |  |  |  |  |  |  | 10.016799 |  |  |  |  |  |  |  |  |  |  |  |  |  |  |  | 10.016799 |  |  |  |  |  |  |  |  |  |  |  |  |  |  |  | 10.016799 |  |  |  |  |  |  |  |  |  |  |  |  |  |  |  | 10.016799 |  |  |  |  |  |  |  |  |  |  |  |  |  |  |  | 10.016799 |  |  |  |  |  |  |  |  |  |  |  |  |  |  |  | 10.016799 |  |  |  |  |  |  |  |  |  |  |  |  |  |  |  | 10.016799 |  |  |  |  |  |  |  |  |  |  |  |  |  |  |  | 10.016799 |  |  |  |  |  |  |  |  |  |  |  |  |  |  |  | 10.016799 |  |  |  |  |  |  |  |  |  |  |  |  |  |  |  | 10.016799 |  |  |  |  |  |  |  |  |  |  |  |  |  |  |  | 10.016799 |  |  |  |  |  |  |  |  |  |  |  |  |  |  |  | 10.016799 |  |  |  |  |  |  |  |  |  |  |  |  |  |  |  | 10.016799 |  |  |  |  |  |  |  |  |  |  |  |  |  |  |  | 10.016799 |  |  |  |  |  |  |  |  |  |  |  |  |  |  |  | 10.016799 |  |  |  |  |  |  |  |  |  |  |  |  |  |  |  | 10.016799 |  |  |  |  |  |  |  |  |  |  |  |  |  |  |  | 10.016799 |  |  |  |  |  |  |  |  |  |  |  |  |  |  |  | 10.016799 |  |  |  |  |  |  |  |  |  |  |  |  |  |  |  | 10.016799 |  |  |  |  |  |  |  |  |  |  |  |  |  |  |  | 10.016799 |  |  |  |  |  |  |  |  |  |  |  |  |  |  |  | 10.016799 |  |  |  |  |  |  |  |  |  |  |  |  |  |  |  | 10.016799 |  |  |  |  |  |  |  |  |  |  |  |  |  |  |  | 10.016799 |  |  |  |  |  |  |  |  |  |  |  |  |  |  |  | 10.016799 |  |  |  |  |  |  |  |  |  |  |  |  |  |  |  | 10.016799 |  |  |  |  |  |  |  |  |  |  |  |  |  |  |  | 10.016799 |  |  |  |  |  |  |  |  |  |  |  |  |  |  |  | 10.016799 |  |  |  |  |  |  |  |  |  |  |  |  |  |  |  | 10.016799 |  |  |  |  |  |  |  |  |  |  |  |  |  |  |  | 10.016799 |  |  |  |  |  |  |  |  |  |  |  |  |  |  |  | 10.016799 |  |  |  |  |  |  |  |  |  |  |  |  |  |  |  | 10.016799 |  |  |  |  |  |  |  |  |  |  |  |  |  |  |  | 10.016799 |  |  |  |  |  |  |  |  |  |  |  |  |  |  |  | 10.016799 |  |  |  |  |  |  |  |  |  |  |  |  |  |  |  | 10.016799 |  |  |  |  |  |  |  |  |  |  |  |  |  |  |  | 10.016799 |  |  |  |  |  |  |  |  |  |  |  |  |  |  |  | 10.016799 |  |  |  |  |  |  |  |  |  |  |  |  |  |  |  | 10.016799 |  |  |  |  |  |  |  |  |  |  |  |  |  |  |  | 10.016799 |  |  |  |  |  |  |  |  |  |  |  |  |  |  |  | 10.016799 |  |  |  |  |  |  |  |  |  |  |  |  |  |  |  | 10.016799 |  |  |  |  |  |  |  |  |  |  |  |  |  |  |  | 10.016799 |  |  |  |  |  |  |  |  |  |  |  |  |  |  |  | 10.016799 |  |  |  |  |  |  |  |  |  |  |  |  |  |  |  | 10.016799 |  |  |  |  |  |  |  |  |  |  |  |  |  |  |  | 10.016799 |  |  |  |  |  |  |  |  |  |  |  |  |  |  |  | 10.016799 |  |  |  |  |  |  |  |  |  |  |  |  |  |  |  | 10.016799 |  |  |  |  |  |  |  |  |  |  |  |  |  |  |  | 10.016799 |  |  |  |  |  |  |  |  |  |  |  |  |  |  |  | 10.016799 |  |  |  |  |  |  |  |  |  |  |  |  |  |  |  | 10.016799 |  |  |  |  |  |  |  |  |  |  |  |  |  |  |  | 10.016799 |  |  |  |  |  |  |  |  |  |  |  |  |  |  |  | 10.016799 |  |  |  |  |  |  |  |  |  |  |  |  |  |  |  | 10.016799 |  |  |  |  |  |  |  |  |  |  |  |  |  |  |  | 10.016799 |  |  |  |  |  |  |  |  |  |  |  |  |  |  |  | 10.016799 |  |  |  |  |  |  |  |  |  |  |  |  |  |  |  | 10.016799 |  |  |  |  |  |  |  |  |  |  |  |  |  |  |  | 10.016799 |  |  |  |  |  |  |  |  |  |  |  |  |  |  |  | 10.016799 |  |  |  |  |  |  |  |  |  |  |  |  |  |  |  | 10.016799 |  |  |  |  |  |  |  |  |  |  |  |  |  |  |  | 10.016799 |  |  |  |  |  |  |  |  |  |  |  |  |  |  |  | 10.016799 |  |  |  |  |  |  |  |  |  |  |  |  |  |  |  | 10.016799 |  |  |  |  |  |  |  |  |  |  |  |  |  |  |  | 10.016799 |  |  |  |  |  |  |  |  |  |  |  |  |  |  |  | 10.016799 |  |  |  |  |  |  |  |  |  |  |  |  |  |  |  | 10.016799 |  |  |  |  |  |  |  |  |  |  |  |  |  |  |  | 10.016799 |  |  |  |  |  |  |  |  |  |  |  |  |  |  |  | 10.016799 |  |  |  |  |  |  |  |  |  |  |  |  |  |  |  | 10.016799 |  |  |  |  |  |  |  |  |  |  |  |  |  |  |  | 10.016799 |  |  |  |  |  |  |  |  |  |  |  |  |  |  |  | 10.016799 |  |  |  |  |  |  |  |  |  |  |  |  |  |  |  | 10.016799 |  |  |  |  |  |  |  |  |  |  |  |  |  |  |  | 10.016799 |  |  |  |  |  |  |  |  |  |  |  |  |  |  |  | 10.016799 |  |  |  |  |  |  |  |  |  |  |  |  |  |  |  | 10.016799 |  |  |  |  |  |  |  |  |  |  |  |  |  |  |  | 10.016799 |  |  |  |  |  |  |  |  |  |  |  |  |  |  |  | 10.016799 |  |  |  |  |  |  |  |  |  |  |  |  |  |  |  | 10.016799 |  |  |  |  |  |  |  |  |  |  |  |  |  |  |  | 10.016799 |  |  |  |  |  |  |  |  |  |  |  |  |  |  |  | 10.016799 |  |  |  |  |  |  |  |  |  |  |  |  |  |  |  | 10.016799 |  |  |  |  |  |  |  |  |  |  |  |  |  |  |  | 10.016799 |  |  |  |  |  |  |  |  |  |  |  |  |  |  |  | 10.016799 |  |  |  |  |  |  |  |  |  |  |  |  |  |  |  | 10.016799 |  |  |  |  |  |  |  |  |  |  |  |  |  |  |  | 10.016799 |  |  |  |  |  |  |  |  |  |  |  |  |  |  |  | 10.016799 |  |  |  |  |  |  |  |  |  |  |  |  |  |  |  | 10.016799 |  |  |  |  |  |  |  |  |  |  |  |  |  |  |  | 10.016799 |  |  |  |  |  |  |  |  |  |  |  |  |  |  |  | 10.016799 |  |  |  |  |  |  |  |  |  |  |  |  |  |  |  | 10.016799 |  |  |  |  |  |  |  |  |  |  |  |  |  |  |  | 10.016799 |  |  |  |  |  |  |  |  |  |  |  |  |  |  |  | 10.016799 |  |  |  |  |  |  |  |  |  |  |  |  |  |  |  | 10.016799 |  |  |  |  |  |  |  |  |  |  |  |  |  |  |  | 10.016799 |  |  |  |  |  |  |  |  |  |  |  |  |  |  |  | 10.016799 |  |  |  |  |  |  |  |  |  |  |  |  |  |  |  | 10.016799 |  |  |  |  |  |  |  |  |  |  |  |  |  |  |  | 10.016799 |  |  |  |  |  |  |  |  |  |  |  |  |  |  |  | 10.016799 |  |  |  |  |  |  |  |  |  |  |  |  |  |  |  | 10.016799 |  |  |  |  |  |  |  |  |  |  |  |  |  |  |  | 10.016799 |  |  |  |  |  |  |  |  |  |  |  |  |  |  |  | 10.016799 |  |  |  |  |  |  |  |  |  |  |  |  |  |  |  | 10.016799 |  |  |  |  |  |  |  |  |  |  |  |  |  |  |  | 10.016799 |  |  |  |  |  |  |  |  |  |  |  |  |  |  |  | 10.016799 |  |  |  |  |  |  |  |  |  |  |  |  |  |  |  | 10.016799 |  |  |  |  |  |  |  |  |  |  |  |  |  |  |  | 10.016799 |  |  |  |  |  |  |  |  |  |  |  |  |  |  |  | 10.016799 |  |  |  |  |  |  |  |  |  |  |  |  |  |  |  | 10.016799 |  |  |  |  |  |  |  |  |  |  |  |  |  |  |  | 10.016799 |  |  |  |  |  |  |  |  |  |  |  |  |  |  |  | 10.016799 |  |  |  |  |  |  |  |  |  |  |  |  |  |  |  | 10.016799 |  |  |  |  |  |  |  |  |  |  |  |  |  |  |  | 10.016799 |  |  |  |  |  |  |  |  |  |  |  |  |  |  |  | 10.016799 |  |  |  |  |  |  |  |  |  |  |  |  |  |  |  | 10.016799 |  |  |  |  |  |  |  |  |  |  |  |  |  |  |  | 10.016799 |  |  |  |  |  |  |  |  |  |  |  |  |  |  |  | 10.016799 |  |  |  |  |  |  |  |  |  |  |  |  |  |  |  | 10.016799 |  |  |  |  |  |  |  |  |  |  |  |  |  |  |  | 10.016799 |  |  |  |  |  |  |  |  |  |  |  |  |  |  |  | 10.016799 |  |  |  |  |  |  |  |  |  |  |  |  |  |  |  | 10.016799 |  |  |  |  |  |  |  |  |  |  |  |  |  |  |  | 10.016799 |  |  |  |  |  |  |  |  |  |  |  |  |  |  |  | 10.016799 |  |  |  |  |  |  |  |  |  |  |  |  |  |  |  | 10.016799 |  |  |  |  |  |  |  |  |  |  |  |  |  |  |  | 10.016799 |  |  |  |  |  |  |  |  |  |  |  |  |  |  |  | 10.016799 |  |  |  |  |  |  |  |  |  |  |  |  |  |  |  | 10.016799 |  |  |  |  |  |  |  |  |  |  |  |  |  |  |  | 10.016799 |  |  |  |  |  |  |  |  |  |  |  |  |  |  |  | 10.016799 |  |  |  |  |  |  |  |  |  |  |  |  |  |  |  | 10.016799 |  |  |  |  |  |  |  |  |  |  |  |  |  |  |  | 10.016799 |  |  |  |  |  |  |  |  |  |  |  |  |  |  |  | 10.016799 |  |  |  |  |  |  |  |  |  |  |  |  |  |  |  | 10.016799 |  |  |  |  |  |  |  |  |  |  |  |  |  |  |  | 10.016799 |  |  |  |  |  |  |  |  |  |  |  |  |  |  |  | 10.016799 |  |  |  |  |  |  |  |  |  |  |  |  |  |  |  | 10.016799 |  |  |  |  |  |  |  |  |  |  |  |  |  |  |  | 10.016799 |  |  |  |  |  |  |  |  |  |  |  |  |  |  |  | 10.016799 |  |  |  |  |  |  |  |  |  |  |  |  |  |  |  | 10.016799 |  |  |  |  |  |  |  |  |  |  |  |  |  |  |  | 10.016799 |  |  |  |  |  |  |  |  |  |  |  |  |  |  |  | 10.016799 |  |  |  |  |  |  |  |  |  |  |  |  |  |  |  | 10.016799 |  |  |  |  |  |  |  |  |  |  |  |  |  |  |  | 10.016799 |  |  |  |  |  |  |  |  |  |  |  |  |  |  |  | 10.016799 |  |  |  |  |  |  |  |  |  |  |  |  |  |  |  | 10.016799 |  |  |  |  |  |  |  |  |  |  |  |  |  |  |  | 10.016799 |  |  |  |  |  |  |  |  |  |  |  |  |  |  |  | 10.016799 |  |  |  |  |  |  |  |  |  |  |  |  |  |  |  | 10.016799 |  |  |  |  |  |  |  |  |  |  |  |  |  |  |  | 10.016799 |  |  |  |  |  |  |  |  |  |  |  |  |  |  |  | 10.016799 |  |  |  |  |  |  |  |  |  |  |  |  |  |  |  | 10.016799 |  |  |  |  |  |  |  |  |  |  |  |  |  |  |  | 10.016799 |  |  |  |  |  |  |  |  |  |  |  |  |  |  |  | 10.016799 |  |  |  |  |  |  |  |  |  |  |  |  |  |  |  | 10.016799 |  |  |  |  |  |  |  |  |  |  |  |  |  |  |  | 10.016799 |  |  |  |  |  |  |  |  |  |  |  |  |  |  |  | 10.016799 |  |  |  |  |  |  |  |  |  |  |  |  |  |  |  | 10.016799 |  |  |  |  |  |  |  |  |  |  |  |  |  |  |  | 10.016799 |  |  |  |  |  |  |  |  |  |  |  |  |  |  |  | 10.016799 |  |  |  |  |  |  |  |  |  |  |  |  |  |  |  | 10.016799 |  |  |  |  |  |  |  |  |  |  |  |  |  |  |  | 10.016799 |  |  |  |  |  |  |  |  |  |  |  |  |  |  |  | 10.016799 |  |  |  |  |  |  |  |  |  |  |  |  |  |  |  | 10.016799 |  |  |  |  |  |  |  |  |  |  |  |  |  |  |  | 10.016799 |  |  |  |  |  |  |  |  |  |  |  |  |  |  |  | 10.016799 |  |  |  |  |  |  |  |  |  |  |  |  |  |  |  | 10.016799 |  |  |  |  |  |  |  |  |  |  |  |  |  |  |  | 10.016799 |  |  |  |  |  |  |  |  |  |  |  |  |  |  |  | 10.016799 |  |  |  |  |  |  |  |  |  |  |  |  |  |  |  | 10.016799 |  |  |  |  |  |  |  |  |  |  |  |  |  |  |  | 10.016799 |  |  |  |  |  |  |  |  |  |  |  |  |  |  |  | 10.016799 |  |  |  |  |  |  |  |  |  |  |  |  |  |  |  | 10.016799 |  |  |  |  |  |  |  |  |  |  |  |  |  |  |  | 10.016799 |  |  |  |  |  |  |  |  |  |  |  |  |  |  |  | 10.016799 |  |  |  |  |  |  |  |  |  |  |  |  |  |  |  | 10.016799 |  |  |  |  |  |  |  |  |  |  |  |  |  |  |  | 10.016799 |  |  |  |  |  |  |  |  |  |  |  |  |  |  |  | 10.016799 |  |  |  |  |  |  |  |  |  |  |  |  |  |  |  | 10.016799 |  |  |  |  |  |  |  |  |  |  |  |  |  |  |  | 10.016799 |  |  |  |  |  |  |  |  |  |  |  |  |  |  |  | 10.016799 |  |  |  |  |  |  |  |  |  |  |  |  |  |  |  | 10.016799 |  |  |  |  |  |  |  |  |  |  |  |  |  |  |  | 10.016799 |  |  |  |  |  |  |  |  |  |  |  |  |  |  |  | 10.016799 |  |  |  |  |  |  |  |  |  |  |  |  |  |  |  | 10.016799 |  |  |  |  |  |  |  |  |  |  |  |  |  |  |  | 10.016799 |  |  |  |  |  |  |  |  |  |  |  |  |  |  |  | 10.016799 |  |  |  |  |  |  |  |  |  |  |  |  |  |  |  | 10.016799 |  |  |  |  |  |  |  |  |  |  |  |  |  |  |  | 10.016799 |  |  |  |  |  |  |  |  |  |  |  |  |  |  |  | 10.016799 |  |  |  |  |  |  |  |  |  |  |  |  |  |  |  | 10.016799 |  |  |  |  |  |  |  |  |  |  |  |  |  |  |  | 10.016799 |  |  |  |  |  |  |  |  |  |  |  |  |  |  |  | 10.016799 |  |  |  |  |  |  |  |  |  |  |  |  |  |  |  | 10.016799 |  |  |  |  |  |  |  |  |  |  |  |  |  |  |  | 10.016799 |  |  |  |  |  |  |  |  |  |  |  |  |  |  |  | 10.016799 |  |  |  |  |  |  |  |  |  |  |  |  |  |  |  | 10.016799 |  |  |  |  |  |  |  |  |  |  |  |  |  |  |  | 10.016799 |  |  |  |  |  |  |  |  |  |  |  |  |  |  |  | 10.016799 |  |  |  |  |  |  |  |  |  |  |  |  |  |  |  | 10.016799 |  |  |  |  |  |  |  |  |  |  |  |  |  |  |  | 10.016799 |  |  |  |  |  |  |  |  |  |  |  |  |  |  |  | 10.016799 |  |  |  |  |  |  |  |  |  |  |  |  |  |  |  |  |  |  |  |  |  |  |  |  |  |  |  |  |  |  |  |
|----------|--|--|--|--|--|--|--|--|--|----------|--|--|--|--|--|--|--|--|--|----------|--|--|--|--|--|--|--|--|--|----------|--|--|--|--|--|--|--|--|--|----------|--|--|--|--|--|--|--|--|--|----------|--|--|--|--|--|--|--|--|--|----------|--|--|--|--|--|--|--|--|--|--|--|----------|--|--|--|--|--|--|--|--|--|--|--|-----------|--|--|--|--|--|--|--|--|--|--|--|--|--|--|--|-----------|--|--|--|--|--|--|--|--|--|--|--|--|--|--|--|-----------|--|--|--|--|--|--|--|--|--|--|--|--|--|--|--|-----------|--|--|--|--|--|--|--|--|--|--|--|--|--|--|--|-----------|--|--|--|--|--|--|--|--|--|--|--|--|--|--|--|-----------|--|--|--|--|--|--|--|--|--|--|--|--|--|--|--|-----------|--|--|--|--|--|--|--|--|--|--|--|--|--|--|--|-----------|--|--|--|--|--|--|--|--|--|--|--|--|--|--|--|-----------|--|--|--|--|--|--|--|--|--|--|--|--|--|--|--|-----------|--|--|--|--|--|--|--|--|--|--|--|--|--|--|--|-----------|--|--|--|--|--|--|--|--|--|--|--|--|--|--|--|-----------|--|--|--|--|--|--|--|--|--|--|--|--|--|--|--|-----------|--|--|--|--|--|--|--|--|--|--|--|--|--|--|--|-----------|--|--|--|--|--|--|--|--|--|--|--|--|--|--|--|-----------|--|--|--|--|--|--|--|--|--|--|--|--|--|--|--|-----------|--|--|--|--|--|--|--|--|--|--|--|--|--|--|--|-----------|--|--|--|--|--|--|--|--|--|--|--|--|--|--|--|-----------|--|--|--|--|--|--|--|--|--|--|--|--|--|--|--|-----------|--|--|--|--|--|--|--|--|--|--|--|--|--|--|--|-----------|--|--|--|--|--|--|--|--|--|--|--|--|--|--|--|-----------|--|--|--|--|--|--|--|--|--|--|--|--|--|--|--|-----------|--|--|--|--|--|--|--|--|--|--|--|--|--|--|--|-----------|--|--|--|--|--|--|--|--|--|--|--|--|--|--|--|-----------|--|--|--|--|--|--|--|--|--|--|--|--|--|--|--|-----------|--|--|--|--|--|--|--|--|--|--|--|--|--|--|--|-----------|--|--|--|--|--|--|--|--|--|--|--|--|--|--|--|-----------|--|--|--|--|--|--|--|--|--|--|--|--|--|--|--|-----------|--|--|--|--|--|--|--|--|--|--|--|--|--|--|--|-----------|--|--|--|--|--|--|--|--|--|--|--|--|--|--|--|-----------|--|--|--|--|--|--|--|--|--|--|--|--|--|--|--|-----------|--|--|--|--|--|--|--|--|--|--|--|--|--|--|--|-----------|--|--|--|--|--|--|--|--|--|--|--|--|--|--|--|-----------|--|--|--|--|--|--|--|--|--|--|--|--|--|--|--|-----------|--|--|--|--|--|--|--|--|--|--|--|--|--|--|--|-----------|--|--|--|--|--|--|--|--|--|--|--|--|--|--|--|-----------|--|--|--|--|--|--|--|--|--|--|--|--|--|--|--|-----------|--|--|--|--|--|--|--|--|--|--|--|--|--|--|--|-----------|--|--|--|--|--|--|--|--|--|--|--|--|--|--|--|-----------|--|--|--|--|--|--|--|--|--|--|--|--|--|--|--|-----------|--|--|--|--|--|--|--|--|--|--|--|--|--|--|--|-----------|--|--|--|--|--|--|--|--|--|--|--|--|--|--|--|-----------|--|--|--|--|--|--|--|--|--|--|--|--|--|--|--|-----------|--|--|--|--|--|--|--|--|--|--|--|--|--|--|--|-----------|--|--|--|--|--|--|--|--|--|--|--|--|--|--|--|-----------|--|--|--|--|--|--|--|--|--|--|--|--|--|--|--|-----------|--|--|--|--|--|--|--|--|--|--|--|--|--|--|--|-----------|--|--|--|--|--|--|--|--|--|--|--|--|--|--|--|-----------|--|--|--|--|--|--|--|--|--|--|--|--|--|--|--|-----------|--|--|--|--|--|--|--|--|--|--|--|--|--|--|--|-----------|--|--|--|--|--|--|--|--|--|--|--|--|--|--|--|-----------|--|--|--|--|--|--|--|--|--|--|--|--|--|--|--|-----------|--|--|--|--|--|--|--|--|--|--|--|--|--|--|--|-----------|--|--|--|--|--|--|--|--|--|--|--|--|--|--|--|-----------|--|--|--|--|--|--|--|--|--|--|--|--|--|--|--|-----------|--|--|--|--|--|--|--|--|--|--|--|--|--|--|--|-----------|--|--|--|--|--|--|--|--|--|--|--|--|--|--|--|-----------|--|--|--|--|--|--|--|--|--|--|--|--|--|--|--|-----------|--|--|--|--|--|--|--|--|--|--|--|--|--|--|--|-----------|--|--|--|--|--|--|--|--|--|--|--|--|--|--|--|-----------|--|--|--|--|--|--|--|--|--|--|--|--|--|--|--|-----------|--|--|--|--|--|--|--|--|--|--|--|--|--|--|--|-----------|--|--|--|--|--|--|--|--|--|--|--|--|--|--|--|-----------|--|--|--|--|--|--|--|--|--|--|--|--|--|--|--|-----------|--|--|--|--|--|--|--|--|--|--|--|--|--|--|--|-----------|--|--|--|--|--|--|--|--|--|--|--|--|--|--|--|-----------|--|--|--|--|--|--|--|--|--|--|--|--|--|--|--|-----------|--|--|--|--|--|--|--|--|--|--|--|--|--|--|--|-----------|--|--|--|--|--|--|--|--|--|--|--|--|--|--|--|-----------|--|--|--|--|--|--|--|--|--|--|--|--|--|--|--|-----------|--|--|--|--|--|--|--|--|--|--|--|--|--|--|--|-----------|--|--|--|--|--|--|--|--|--|--|--|--|--|--|--|-----------|--|--|--|--|--|--|--|--|--|--|--|--|--|--|--|-----------|--|--|--|--|--|--|--|--|--|--|--|--|--|--|--|-----------|--|--|--|--|--|--|--|--|--|--|--|--|--|--|--|-----------|--|--|--|--|--|--|--|--|--|--|--|--|--|--|--|-----------|--|--|--|--|--|--|--|--|--|--|--|--|--|--|--|-----------|--|--|--|--|--|--|--|--|--|--|--|--|--|--|--|-----------|--|--|--|--|--|--|--|--|--|--|--|--|--|--|--|-----------|--|--|--|--|--|--|--|--|--|--|--|--|--|--|--|-----------|--|--|--|--|--|--|--|--|--|--|--|--|--|--|--|-----------|--|--|--|--|--|--|--|--|--|--|--|--|--|--|--|-----------|--|--|--|--|--|--|--|--|--|--|--|--|--|--|--|-----------|--|--|--|--|--|--|--|--|--|--|--|--|--|--|--|-----------|--|--|--|--|--|--|--|--|--|--|--|--|--|--|--|-----------|--|--|--|--|--|--|--|--|--|--|--|--|--|--|--|-----------|--|--|--|--|--|--|--|--|--|--|--|--|--|--|--|-----------|--|--|--|--|--|--|--|--|--|--|--|--|--|--|--|-----------|--|--|--|--|--|--|--|--|--|--|--|--|--|--|--|-----------|--|--|--|--|--|--|--|--|--|--|--|--|--|--|--|-----------|--|--|--|--|--|--|--|--|--|--|--|--|--|--|--|-----------|--|--|--|--|--|--|--|--|--|--|--|--|--|--|--|-----------|--|--|--|--|--|--|--|--|--|--|--|--|--|--|--|-----------|--|--|--|--|--|--|--|--|--|--|--|--|--|--|--|-----------|--|--|--|--|--|--|--|--|--|--|--|--|--|--|--|-----------|--|--|--|--|--|--|--|--|--|--|--|--|--|--|--|-----------|--|--|--|--|--|--|--|--|--|--|--|--|--|--|--|-----------|--|--|--|--|--|--|--|--|--|--|--|--|--|--|--|-----------|--|--|--|--|--|--|--|--|--|--|--|--|--|--|--|-----------|--|--|--|--|--|--|--|--|--|--|--|--|--|--|--|-----------|--|--|--|--|--|--|--|--|--|--|--|--|--|--|--|-----------|--|--|--|--|--|--|--|--|--|--|--|--|--|--|--|-----------|--|--|--|--|--|--|--|--|--|--|--|--|--|--|--|-----------|--|--|--|--|--|--|--|--|--|--|--|--|--|--|--|-----------|--|--|--|--|--|--|--|--|--|--|--|--|--|--|--|-----------|--|--|--|--|--|--|--|--|--|--|--|--|--|--|--|-----------|--|--|--|--|--|--|--|--|--|--|--|--|--|--|--|-----------|--|--|--|--|--|--|--|--|--|--|--|--|--|--|--|-----------|--|--|--|--|--|--|--|--|--|--|--|--|--|--|--|-----------|--|--|--|--|--|--|--|--|--|--|--|--|--|--|--|-----------|--|--|--|--|--|--|--|--|--|--|--|--|--|--|--|-----------|--|--|--|--|--|--|--|--|--|--|--|--|--|--|--|-----------|--|--|--|--|--|--|--|--|--|--|--|--|--|--|--|-----------|--|--|--|--|--|--|--|--|--|--|--|--|--|--|--|-----------|--|--|--|--|--|--|--|--|--|--|--|--|--|--|--|-----------|--|--|--|--|--|--|--|--|--|--|--|--|--|--|--|-----------|--|--|--|--|--|--|--|--|--|--|--|--|--|--|--|-----------|--|--|--|--|--|--|--|--|--|--|--|--|--|--|--|-----------|--|--|--|--|--|--|--|--|--|--|--|--|--|--|--|-----------|--|--|--|--|--|--|--|--|--|--|--|--|--|--|--|-----------|--|--|--|--|--|--|--|--|--|--|--|--|--|--|--|-----------|--|--|--|--|--|--|--|--|--|--|--|--|--|--|--|-----------|--|--|--|--|--|--|--|--|--|--|--|--|--|--|--|-----------|--|--|--|--|--|--|--|--|--|--|--|--|--|--|--|-----------|--|--|--|--|--|--|--|--|--|--|--|--|--|--|--|-----------|--|--|--|--|--|--|--|--|--|--|--|--|--|--|--|-----------|--|--|--|--|--|--|--|--|--|--|--|--|--|--|--|-----------|--|--|--|--|--|--|--|--|--|--|--|--|--|--|--|-----------|--|--|--|--|--|--|--|--|--|--|--|--|--|--|--|-----------|--|--|--|--|--|--|--|--|--|--|--|--|--|--|--|-----------|--|--|--|--|--|--|--|--|--|--|--|--|--|--|--|-----------|--|--|--|--|--|--|--|--|--|--|--|--|--|--|--|-----------|--|--|--|--|--|--|--|--|--|--|--|--|--|--|--|-----------|--|--|--|--|--|--|--|--|--|--|--|--|--|--|--|-----------|--|--|--|--|--|--|--|--|--|--|--|--|--|--|--|-----------|--|--|--|--|--|--|--|--|--|--|--|--|--|--|--|-----------|--|--|--|--|--|--|--|--|--|--|--|--|--|--|--|-----------|--|--|--|--|--|--|--|--|--|--|--|--|--|--|--|-----------|--|--|--|--|--|--|--|--|--|--|--|--|--|--|--|-----------|--|--|--|--|--|--|--|--|--|--|--|--|--|--|--|-----------|--|--|--|--|--|--|--|--|--|--|--|--|--|--|--|-----------|--|--|--|--|--|--|--|--|--|--|--|--|--|--|--|-----------|--|--|--|--|--|--|--|--|--|--|--|--|--|--|--|-----------|--|--|--|--|--|--|--|--|--|--|--|--|--|--|--|-----------|--|--|--|--|--|--|--|--|--|--|--|--|--|--|--|-----------|--|--|--|--|--|--|--|--|--|--|--|--|--|--|--|-----------|--|--|--|--|--|--|--|--|--|--|--|--|--|--|--|-----------|--|--|--|--|--|--|--|--|--|--|--|--|--|--|--|-----------|--|--|--|--|--|--|--|--|--|--|--|--|--|--|--|-----------|--|--|--|--|--|--|--|--|--|--|--|--|--|--|--|-----------|--|--|--|--|--|--|--|--|--|--|--|--|--|--|--|-----------|--|--|--|--|--|--|--|--|--|--|--|--|--|--|--|-----------|--|--|--|--|--|--|--|--|--|--|--|--|--|--|--|-----------|--|--|--|--|--|--|--|--|--|--|--|--|--|--|--|-----------|--|--|--|--|--|--|--|--|--|--|--|--|--|--|--|-----------|--|--|--|--|--|--|--|--|--|--|--|--|--|--|--|-----------|--|--|--|--|--|--|--|--|--|--|--|--|--|--|--|-----------|--|--|--|--|--|--|--|--|--|--|--|--|--|--|--|-----------|--|--|--|--|--|--|--|--|--|--|--|--|--|--|--|-----------|--|--|--|--|--|--|--|--|--|--|--|--|--|--|--|-----------|--|--|--|--|--|--|--|--|--|--|--|--|--|--|--|-----------|--|--|--|--|--|--|--|--|--|--|--|--|--|--|--|-----------|--|--|--|--|--|--|--|--|--|--|--|--|--|--|--|-----------|--|--|--|--|--|--|--|--|--|--|--|--|--|--|--|-----------|--|--|--|--|--|--|--|--|--|--|--|--|--|--|--|-----------|--|--|--|--|--|--|--|--|--|--|--|--|--|--|--|-----------|--|--|--|--|--|--|--|--|--|--|--|--|--|--|--|-----------|--|--|--|--|--|--|--|--|--|--|--|--|--|--|--|-----------|--|--|--|--|--|--|--|--|--|--|--|--|--|--|--|-----------|--|--|--|--|--|--|--|--|--|--|--|--|--|--|--|-----------|--|--|--|--|--|--|--|--|--|--|--|--|--|--|--|-----------|--|--|--|--|--|--|--|--|--|--|--|--|--|--|--|-----------|--|--|--|--|--|--|--|--|--|--|--|--|--|--|--|-----------|--|--|--|--|--|--|--|--|--|--|--|--|--|--|--|-----------|--|--|--|--|--|--|--|--|--|--|--|--|--|--|--|-----------|--|--|--|--|--|--|--|--|--|--|--|--|--|--|--|-----------|--|--|--|--|--|--|--|--|--|--|--|--|--|--|--|-----------|--|--|--|--|--|--|--|--|--|--|--|--|--|--|--|-----------|--|--|--|--|--|--|--|--|--|--|--|--|--|--|--|-----------|--|--|--|--|--|--|--|--|--|--|--|--|--|--|--|-----------|--|--|--|--|--|--|--|--|--|--|--|--|--|--|--|-----------|--|--|--|--|--|--|--|--|--|--|--|--|--|--|--|-----------|--|--|--|--|--|--|--|--|--|--|--|--|--|--|--|-----------|--|--|--|--|--|--|--|--|--|--|--|--|--|--|--|-----------|--|--|--|--|--|--|--|--|--|--|--|--|--|--|--|-----------|--|--|--|--|--|--|--|--|--|--|--|--|--|--|--|-----------|--|--|--|--|--|--|--|--|--|--|--|--|--|--|--|-----------|--|--|--|--|--|--|--|--|--|--|--|--|--|--|--|-----------|--|--|--|--|--|--|--|--|--|--|--|--|--|--|--|-----------|--|--|--|--|--|--|--|--|--|--|--|--|--|--|--|-----------|--|--|--|--|--|--|--|--|--|--|--|--|--|--|--|-----------|--|--|--|--|--|--|--|--|--|--|--|--|--|--|--|-----------|--|--|--|--|--|--|--|--|--|--|--|--|--|--|--|-----------|--|--|--|--|--|--|--|--|--|--|--|--|--|--|--|-----------|--|--|--|--|--|--|--|--|--|--|--|--|--|--|--|-----------|--|--|--|--|--|--|--|--|--|--|--|--|--|--|--|-----------|--|--|--|--|--|--|--|--|--|--|--|--|--|--|--|-----------|--|--|--|--|--|--|--|--|--|--|--|--|--|--|--|-----------|--|--|--|--|--|--|--|--|--|--|--|--|--|--|--|-----------|--|--|--|--|--|--|--|--|--|--|--|--|--|--|--|-----------|--|--|--|--|--|--|--|--|--|--|--|--|--|--|--|-----------|--|--|--|--|--|--|--|--|--|--|--|--|--|--|--|-----------|--|--|--|--|--|--|--|--|--|--|--|--|--|--|--|-----------|--|--|--|--|--|--|--|--|--|--|--|--|--|--|--|-----------|--|--|--|--|--|--|--|--|--|--|--|--|--|--|--|-----------|--|--|--|--|--|--|--|--|--|--|--|--|--|--|--|-----------|--|--|--|--|--|--|--|--|--|--|--|--|--|--|--|-----------|--|--|--|--|--|--|--|--|--|--|--|--|--|--|--|-----------|--|--|--|--|--|--|--|--|--|--|--|--|--|--|--|-----------|--|--|--|--|--|--|--|--|--|--|--|--|--|--|--|-----------|--|--|--|--|--|--|--|--|--|--|--|--|--|--|--|-----------|--|--|--|--|--|--|--|--|--|--|--|--|--|--|--|-----------|--|--|--|--|--|--|--|--|--|--|--|--|--|--|--|-----------|--|--|--|--|--|--|--|--|--|--|--|--|--|--|--|-----------|--|--|--|--|--|--|--|--|--|--|--|--|--|--|--|-----------|--|--|--|--|--|--|--|--|--|--|--|--|--|--|--|-----------|--|--|--|--|--|--|--|--|--|--|--|--|--|--|--|-----------|--|--|--|--|--|--|--|--|--|--|--|--|--|--|--|-----------|--|--|--|--|--|--|--|--|--|--|--|--|--|--|--|-----------|--|--|--|--|--|--|--|--|--|--|--|--|--|--|--|-----------|--|--|--|--|--|--|--|--|--|--|--|--|--|--|--|-----------|--|--|--|--|--|--|--|--|--|--|--|--|--|--|--|-----------|--|--|--|--|--|--|--|--|--|--|--|--|--|--|--|-----------|--|--|--|--|--|--|--|--|--|--|--|--|--|--|--|-----------|--|--|--|--|--|--|--|--|--|--|--|--|--|--|--|-----------|--|--|--|--|--|--|--|--|--|--|--|--|--|--|--|-----------|--|--|--|--|--|--|--|--|--|--|--|--|--|--|--|-----------|--|--|--|--|--|--|--|--|--|--|--|--|--|--|--|-----------|--|--|--|--|--|--|--|--|--|--|--|--|--|--|--|-----------|--|--|--|--|--|--|--|--|--|--|--|--|--|--|--|-----------|--|--|--|--|--|--|--|--|--|--|--|--|--|--|--|-----------|--|--|--|--|--|--|--|--|--|--|--|--|--|--|--|-----------|--|--|--|--|--|--|--|--|--|--|--|--|--|--|--|-----------|--|--|--|--|--|--|--|--|--|--|--|--|--|--|--|-----------|--|--|--|--|--|--|--|--|--|--|--|--|--|--|--|-----------|--|--|--|--|--|--|--|--|--|--|--|--|--|--|--|-----------|--|--|--|--|--|--|--|--|--|--|--|--|--|--|--|-----------|--|--|--|--|--|--|--|--|--|--|--|--|--|--|--|-----------|--|--|--|--|--|--|--|--|--|--|--|--|--|--|--|-----------|--|--|--|--|--|--|--|--|--|--|--|--|--|--|--|-----------|--|--|--|--|--|--|--|--|--|--|--|--|--|--|--|-----------|--|--|--|--|--|--|--|--|--|--|--|--|--|--|--|-----------|--|--|--|--|--|--|--|--|--|--|--|--|--|--|--|-----------|--|--|--|--|--|--|--|--|--|--|--|--|--|--|--|-----------|--|--|--|--|--|--|--|--|--|--|--|--|--|--|--|-----------|--|--|--|--|--|--|--|--|--|--|--|--|--|--|--|-----------|--|--|--|--|--|--|--|--|--|--|--|--|--|--|--|-----------|--|--|--|--|--|--|--|--|--|--|--|--|--|--|--|-----------|--|--|--|--|--|--|--|--|--|--|--|--|--|--|--|-----------|--|--|--|--|--|--|--|--|--|--|--|--|--|--|--|-----------|--|--|--|--|--|--|--|--|--|--|--|--|--|--|--|-----------|--|--|--|--|--|--|--|--|--|--|--|--|--|--|--|-----------|--|--|--|--|--|--|--|--|--|--|--|--|--|--|--|-----------|--|--|--|--|--|--|--|--|--|--|--|--|--|--|--|-----------|--|--|--|--|--|--|--|--|--|--|--|--|--|--|--|-----------|--|--|--|--|--|--|--|--|--|--|--|--|--|--|--|-----------|--|--|--|--|--|--|--|--|--|--|--|--|--|--|--|-----------|--|--|--|--|--|--|--|--|--|--|--|--|--|--|--|-----------|--|--|--|--|--|--|--|--|--|--|--|--|--|--|--|-----------|--|--|--|--|--|--|--|--|--|--|--|--|--|--|--|-----------|--|--|--|--|--|--|--|--|--|--|--|--|--|--|--|-----------|--|--|--|--|--|--|--|--|--|--|--|--|--|--|--|-----------|--|--|--|--|--|--|--|--|--|--|--|--|--|--|--|-----------|--|--|--|--|--|--|--|--|--|--|--|--|--|--|--|-----------|--|--|--|--|--|--|--|--|--|--|--|--|--|--|--|-----------|--|--|--|--|--|--|--|--|--|--|--|--|--|--|--|-----------|--|--|--|--|--|--|--|--|--|--|--|--|--|--|--|-----------|--|--|--|--|--|--|--|--|--|--|--|--|--|--|--|-----------|--|--|--|--|--|--|--|--|--|--|--|--|--|--|--|-----------|--|--|--|--|--|--|--|--|--|--|--|--|--|--|--|-----------|--|--|--|--|--|--|--|--|--|--|--|--|--|--|--|-----------|--|--|--|--|--|--|--|--|--|--|--|--|--|--|--|-----------|--|--|--|--|--|--|--|--|--|--|--|--|--|--|--|-----------|--|--|--|--|--|--|--|--|--|--|--|--|--|--|--|-----------|--|--|--|--|--|--|--|--|--|--|--|--|--|--|--|-----------|--|--|--|--|--|--|--|--|--|--|--|--|--|--|--|-----------|--|--|--|--|--|--|--|--|--|--|--|--|--|--|--|-----------|--|--|--|--|--|--|--|--|--|--|--|--|--|--|--|-----------|--|--|--|--|--|--|--|--|--|--|--|--|--|--|--|-----------|--|--|--|--|--|--|--|--|--|--|--|--|--|--|--|-----------|--|--|--|--|--|--|--|--|--|--|--|--|--|--|--|-----------|--|--|--|--|--|--|--|--|--|--|--|--|--|--|--|-----------|--|--|--|--|--|--|--|--|--|--|--|--|--|--|--|-----------|--|--|--|--|--|--|--|--|--|--|--|--|--|--|--|-----------|--|--|--|--|--|--|--|--|--|--|--|--|--|--|--|-----------|--|--|--|--|--|--|--|--|--|--|--|--|--|--|--|-----------|--|--|--|--|--|--|--|--|--|--|--|--|--|--|--|-----------|--|--|--|--|--|--|--|--|--|--|--|--|--|--|--|-----------|--|--|--|--|--|--|--|--|--|--|--|--|--|--|--|-----------|--|--|--|--|--|--|--|--|--|--|--|--|--|--|--|-----------|--|--|--|--|--|--|--|--|--|--|--|--|--|--|--|-----------|--|--|--|--|--|--|--|--|--|--|--|--|--|--|--|-----------|--|--|--|--|--|--|--|--|--|--|--|--|--|--|--|-----------|--|--|--|--|--|--|--|--|--|--|--|--|--|--|--|-----------|--|--|--|--|--|--|--|--|--|--|--|--|--|--|--|-----------|--|--|--|--|--|--|--|--|--|--|--|--|--|--|--|-----------|--|--|--|--|--|--|--|--|--|--|--|--|--|--|--|-----------|--|--|--|--|--|--|--|--|--|--|--|--|--|--|--|-----------|--|--|--|--|--|--|--|--|--|--|--|--|--|--|--|-----------|--|--|--|--|--|--|--|--|--|--|--|--|--|--|--|-----------|--|--|--|--|--|--|--|--|--|--|--|--|--|--|--|-----------|--|--|--|--|--|--|--|--|--|--|--|--|--|--|--|-----------|--|--|--|--|--|--|--|--|--|--|--|--|--|--|--|-----------|--|--|--|--|--|--|--|--|--|--|--|--|--|--|--|-----------|--|--|--|--|--|--|--|--|--|--|--|--|--|--|--|-----------|--|--|--|--|--|--|--|--|--|--|--|--|--|--|--|-----------|--|--|--|--|--|--|--|--|--|--|--|--|--|--|--|-----------|--|--|--|--|--|--|--|--|--|--|--|--|--|--|--|-----------|--|--|--|--|--|--|--|--|--|--|--|--|--|--|--|-----------|--|--|--|--|--|--|--|--|--|--|--|--|--|--|--|-----------|--|--|--|--|--|--|--|--|--|--|--|--|--|--|--|-----------|--|--|--|--|--|--|--|--|--|--|--|--|--|--|--|-----------|--|--|--|--|--|--|--|--|--|--|--|--|--|--|--|-----------|--|--|--|--|--|--|--|--|--|--|--|--|--|--|--|-----------|--|--|--|--|--|--|--|--|--|--|--|--|--|--|--|-----------|--|--|--|--|--|--|--|--|--|--|--|--|--|--|--|-----------|--|--|--|--|--|--|--|--|--|--|--|--|--|--|--|-----------|--|--|--|--|--|--|--|--|--|--|--|--|--|--|--|-----------|--|--|--|--|--|--|--|--|--|--|--|--|--|--|--|-----------|--|--|--|--|--|--|--|--|--|--|--|--|--|--|--|-----------|--|--|--|--|--|--|--|--|--|--|--|--|--|--|--|-----------|--|--|--|--|--|--|--|--|--|--|--|--|--|--|--|-----------|--|--|--|--|--|--|--|--|--|--|--|--|--|--|--|-----------|--|--|--|--|--|--|--|--|--|--|--|--|--|--|--|-----------|--|--|--|--|--|--|--|--|--|--|--|--|--|--|--|-----------|--|--|--|--|--|--|--|--|--|--|--|--|--|--|--|-----------|--|--|--|--|--|--|--|--|--|--|--|--|--|--|--|-----------|--|--|--|--|--|--|--|--|--|--|--|--|--|--|--|-----------|--|--|--|--|--|--|--|--|--|--|--|--|--|--|--|-----------|--|--|--|--|--|--|--|--|--|--|--|--|--|--|--|-----------|--|--|--|--|--|--|--|--|--|--|--|--|--|--|--|-----------|--|--|--|--|--|--|--|--|--|--|--|--|--|--|--|-----------|--|--|--|--|--|--|--|--|--|--|--|--|--|--|--|-----------|--|--|--|--|--|--|--|--|--|--|--|--|--|--|--|-----------|--|--|--|--|--|--|--|--|--|--|--|--|--|--|--|-----------|--|--|--|--|--|--|--|--|--|--|--|--|--|--|--|-----------|--|--|--|--|--|--|--|--|--|--|--|--|--|--|--|-----------|--|--|--|--|--|--|--|--|--|--|--|--|--|--|--|-----------|--|--|--|--|--|--|--|--|--|--|--|--|--|--|--|-----------|--|--|--|--|--|--|--|--|--|--|--|--|--|--|--|-----------|--|--|--|--|--|--|--|--|--|--|--|--|--|--|--|-----------|--|--|--|--|--|--|--|--|--|--|--|--|--|--|--|-----------|--|--|--|--|--|--|--|--|--|--|--|--|--|--|--|-----------|--|--|--|--|--|--|--|--|--|--|--|--|--|--|--|-----------|--|--|--|--|--|--|--|--|--|--|--|--|--|--|--|-----------|--|--|--|--|--|--|--|--|--|--|--|--|--|--|--|-----------|--|--|--|--|--|--|--|--|--|--|--|--|--|--|--|-----------|--|--|--|--|--|--|--|--|--|--|--|--|--|--|--|-----------|--|--|--|--|--|--|--|--|--|--|--|--|--|--|--|-----------|--|--|--|--|--|--|--|--|--|--|--|--|--|--|--|-----------|--|--|--|--|--|--|--|--|--|--|--|--|--|--|--|-----------|--|--|--|--|--|--|--|--|--|--|--|--|--|--|--|-----------|--|--|--|--|--|--|--|--|--|--|--|--|--|--|--|-----------|--|--|--|--|--|--|--|--|--|--|--|--|--|--|--|-----------|--|--|--|--|--|--|--|--|--|--|--|--|--|--|--|-----------|--|--|--|--|--|--|--|--|--|--|--|--|--|--|--|-----------|--|--|--|--|--|--|--|--|--|--|--|--|--|--|--|-----------|--|--|--|--|--|--|--|--|--|--|--|--|--|--|--|-----------|--|--|--|--|--|--|--|--|--|--|--|--|--|--|--|-----------|--|--|--|--|--|--|--|--|--|--|--|--|--|--|--|-----------|--|--|--|--|--|--|--|--|--|--|--|--|--|--|--|-----------|--|--|--|--|--|--|--|--|--|--|--|--|--|--|--|-----------|--|--|--|--|--|--|--|--|--|--|--|--|--|--|--|-----------|--|--|--|--|--|--|--|--|--|--|--|--|--|--|--|-----------|--|--|--|--|--|--|--|--|--|--|--|--|--|--|--|-----------|--|--|--|--|--|--|--|--|--|--|--|--|--|--|--|-----------|--|--|--|--|--|--|--|--|--|--|--|--|--|--|--|-----------|--|--|--|--|--|--|--|--|--|--|--|--|--|--|--|-----------|--|--|--|--|--|--|--|--|--|--|--|--|--|--|--|-----------|--|--|--|--|--|--|--|--|--|--|--|--|--|--|--|-----------|--|--|--|--|--|--|--|--|--|--|--|--|--|--|--|-----------|--|--|--|--|--|--|--|--|--|--|--|--|--|--|--|-----------|--|--|--|--|--|--|--|--|--|--|--|--|--|--|--|-----------|--|--|--|--|--|--|--|--|--|--|--|--|--|--|--|-----------|--|--|--|--|--|--|--|--|--|--|--|--|--|--|--|-----------|--|--|--|--|--|--|--|--|--|--|--|--|--|--|--|-----------|--|--|--|--|--|--|--|--|--|--|--|--|--|--|--|-----------|--|--|--|--|--|--|--|--|--|--|--|--|--|--|--|-----------|--|--|--|--|--|--|--|--|--|--|--|--|--|--|--|-----------|--|--|--|--|--|--|--|--|--|--|--|--|--|--|--|-----------|--|--|--|--|--|--|--|--|--|--|--|--|--|--|--|-----------|--|--|--|--|--|--|--|--|--|--|--|--|--|--|--|-----------|--|--|--|--|--|--|--|--|--|--|--|--|--|--|--|-----------|--|--|--|--|--|--|--|--|--|--|--|--|--|--|--|-----------|--|--|--|--|--|--|--|--|--|--|--|--|--|--|--|-----------|--|--|--|--|--|--|--|--|--|--|--|--|--|--|--|-----------|--|--|--|--|--|--|--|--|--|--|--|--|--|--|--|-----------|--|--|--|--|--|--|--|--|--|--|--|--|--|--|--|-----------|--|--|--|--|--|--|--|--|--|--|--|--|--|--|--|--|--|--|--|--|--|--|--|--|--|--|--|--|--|--|--|
|----------|--|--|--|--|--|--|--|--|--|----------|--|--|--|--|--|--|--|--|--|----------|--|--|--|--|--|--|--|--|--|----------|--|--|--|--|--|--|--|--|--|----------|--|--|--|--|--|--|--|--|--|----------|--|--|--|--|--|--|--|--|--|----------|--|--|--|--|--|--|--|--|--|--|--|----------|--|--|--|--|--|--|--|--|--|--|--|-----------|--|--|--|--|--|--|--|--|--|--|--|--|--|--|--|-----------|--|--|--|--|--|--|--|--|--|--|--|--|--|--|--|-----------|--|--|--|--|--|--|--|--|--|--|--|--|--|--|--|-----------|--|--|--|--|--|--|--|--|--|--|--|--|--|--|--|-----------|--|--|--|--|--|--|--|--|--|--|--|--|--|--|--|-----------|--|--|--|--|--|--|--|--|--|--|--|--|--|--|--|-----------|--|--|--|--|--|--|--|--|--|--|--|--|--|--|--|-----------|--|--|--|--|--|--|--|--|--|--|--|--|--|--|--|-----------|--|--|--|--|--|--|--|--|--|--|--|--|--|--|--|-----------|--|--|--|--|--|--|--|--|--|--|--|--|--|--|--|-----------|--|--|--|--|--|--|--|--|--|--|--|--|--|--|--|-----------|--|--|--|--|--|--|--|--|--|--|--|--|--|--|--|-----------|--|--|--|--|--|--|--|--|--|--|--|--|--|--|--|-----------|--|--|--|--|--|--|--|--|--|--|--|--|--|--|--|-----------|--|--|--|--|--|--|--|--|--|--|--|--|--|--|--|-----------|--|--|--|--|--|--|--|--|--|--|--|--|--|--|--|-----------|--|--|--|--|--|--|--|--|--|--|--|--|--|--|--|-----------|--|--|--|--|--|--|--|--|--|--|--|--|--|--|--|-----------|--|--|--|--|--|--|--|--|--|--|--|--|--|--|--|-----------|--|--|--|--|--|--|--|--|--|--|--|--|--|--|--|-----------|--|--|--|--|--|--|--|--|--|--|--|--|--|--|--|-----------|--|--|--|--|--|--|--|--|--|--|--|--|--|--|--|-----------|--|--|--|--|--|--|--|--|--|--|--|--|--|--|--|-----------|--|--|--|--|--|--|--|--|--|--|--|--|--|--|--|-----------|--|--|--|--|--|--|--|--|--|--|--|--|--|--|--|-----------|--|--|--|--|--|--|--|--|--|--|--|--|--|--|--|-----------|--|--|--|--|--|--|--|--|--|--|--|--|--|--|--|-----------|--|--|--|--|--|--|--|--|--|--|--|--|--|--|--|-----------|--|--|--|--|--|--|--|--|--|--|--|--|--|--|--|-----------|--|--|--|--|--|--|--|--|--|--|--|--|--|--|--|-----------|--|--|--|--|--|--|--|--|--|--|--|--|--|--|--|-----------|--|--|--|--|--|--|--|--|--|--|--|--|--|--|--|-----------|--|--|--|--|--|--|--|--|--|--|--|--|--|--|--|-----------|--|--|--|--|--|--|--|--|--|--|--|--|--|--|--|-----------|--|--|--|--|--|--|--|--|--|--|--|--|--|--|--|-----------|--|--|--|--|--|--|--|--|--|--|--|--|--|--|--|-----------|--|--|--|--|--|--|--|--|--|--|--|--|--|--|--|-----------|--|--|--|--|--|--|--|--|--|--|--|--|--|--|--|-----------|--|--|--|--|--|--|--|--|--|--|--|--|--|--|--|-----------|--|--|--|--|--|--|--|--|--|--|--|--|--|--|--|-----------|--|--|--|--|--|--|--|--|--|--|--|--|--|--|--|-----------|--|--|--|--|--|--|--|--|--|--|--|--|--|--|--|-----------|--|--|--|--|--|--|--|--|--|--|--|--|--|--|--|-----------|--|--|--|--|--|--|--|--|--|--|--|--|--|--|--|-----------|--|--|--|--|--|--|--|--|--|--|--|--|--|--|--|-----------|--|--|--|--|--|--|--|--|--|--|--|--|--|--|--|-----------|--|--|--|--|--|--|--|--|--|--|--|--|--|--|--|-----------|--|--|--|--|--|--|--|--|--|--|--|--|--|--|--|-----------|--|--|--|--|--|--|--|--|--|--|--|--|--|--|--|-----------|--|--|--|--|--|--|--|--|--|--|--|--|--|--|--|-----------|--|--|--|--|--|--|--|--|--|--|--|--|--|--|--|-----------|--|--|--|--|--|--|--|--|--|--|--|--|--|--|--|-----------|--|--|--|--|--|--|--|--|--|--|--|--|--|--|--|-----------|--|--|--|--|--|--|--|--|--|--|--|--|--|--|--|-----------|--|--|--|--|--|--|--|--|--|--|--|--|--|--|--|-----------|--|--|--|--|--|--|--|--|--|--|--|--|--|--|--|-----------|--|--|--|--|--|--|--|--|--|--|--|--|--|--|--|-----------|--|--|--|--|--|--|--|--|--|--|--|--|--|--|--|-----------|--|--|--|--|--|--|--|--|--|--|--|--|--|--|--|-----------|--|--|--|--|--|--|--|--|--|--|--|--|--|--|--|-----------|--|--|--|--|--|--|--|--|--|--|--|--|--|--|--|-----------|--|--|--|--|--|--|--|--|--|--|--|--|--|--|--|-----------|--|--|--|--|--|--|--|--|--|--|--|--|--|--|--|-----------|--|--|--|--|--|--|--|--|--|--|--|--|--|--|--|-----------|--|--|--|--|--|--|--|--|--|--|--|--|--|--|--|-----------|--|--|--|--|--|--|--|--|--|--|--|--|--|--|--|-----------|--|--|--|--|--|--|--|--|--|--|--|--|--|--|--|-----------|--|--|--|--|--|--|--|--|--|--|--|--|--|--|--|-----------|--|--|--|--|--|--|--|--|--|--|--|--|--|--|--|-----------|--|--|--|--|--|--|--|--|--|--|--|--|--|--|--|-----------|--|--|--|--|--|--|--|--|--|--|--|--|--|--|--|-----------|--|--|--|--|--|--|--|--|--|--|--|--|--|--|--|-----------|--|--|--|--|--|--|--|--|--|--|--|--|--|--|--|-----------|--|--|--|--|--|--|--|--|--|--|--|--|--|--|--|-----------|--|--|--|--|--|--|--|--|--|--|--|--|--|--|--|-----------|--|--|--|--|--|--|--|--|--|--|--|--|--|--|--|-----------|--|--|--|--|--|--|--|--|--|--|--|--|--|--|--|-----------|--|--|--|--|--|--|--|--|--|--|--|--|--|--|--|-----------|--|--|--|--|--|--|--|--|--|--|--|--|--|--|--|-----------|--|--|--|--|--|--|--|--|--|--|--|--|--|--|--|-----------|--|--|--|--|--|--|--|--|--|--|--|--|--|--|--|-----------|--|--|--|--|--|--|--|--|--|--|--|--|--|--|--|-----------|--|--|--|--|--|--|--|--|--|--|--|--|--|--|--|-----------|--|--|--|--|--|--|--|--|--|--|--|--|--|--|--|-----------|--|--|--|--|--|--|--|--|--|--|--|--|--|--|--|-----------|--|--|--|--|--|--|--|--|--|--|--|--|--|--|--|-----------|--|--|--|--|--|--|--|--|--|--|--|--|--|--|--|-----------|--|--|--|--|--|--|--|--|--|--|--|--|--|--|--|-----------|--|--|--|--|--|--|--|--|--|--|--|--|--|--|--|-----------|--|--|--|--|--|--|--|--|--|--|--|--|--|--|--|-----------|--|--|--|--|--|--|--|--|--|--|--|--|--|--|--|-----------|--|--|--|--|--|--|--|--|--|--|--|--|--|--|--|-----------|--|--|--|--|--|--|--|--|--|--|--|--|--|--|--|-----------|--|--|--|--|--|--|--|--|--|--|--|--|--|--|--|-----------|--|--|--|--|--|--|--|--|--|--|--|--|--|--|--|-----------|--|--|--|--|--|--|--|--|--|--|--|--|--|--|--|-----------|--|--|--|--|--|--|--|--|--|--|--|--|--|--|--|-----------|--|--|--|--|--|--|--|--|--|--|--|--|--|--|--|-----------|--|--|--|--|--|--|--|--|--|--|--|--|--|--|--|-----------|--|--|--|--|--|--|--|--|--|--|--|--|--|--|--|-----------|--|--|--|--|--|--|--|--|--|--|--|--|--|--|--|-----------|--|--|--|--|--|--|--|--|--|--|--|--|--|--|--|-----------|--|--|--|--|--|--|--|--|--|--|--|--|--|--|--|-----------|--|--|--|--|--|--|--|--|--|--|--|--|--|--|--|-----------|--|--|--|--|--|--|--|--|--|--|--|--|--|--|--|-----------|--|--|--|--|--|--|--|--|--|--|--|--|--|--|--|-----------|--|--|--|--|--|--|--|--|--|--|--|--|--|--|--|-----------|--|--|--|--|--|--|--|--|--|--|--|--|--|--|--|-----------|--|--|--|--|--|--|--|--|--|--|--|--|--|--|--|-----------|--|--|--|--|--|--|--|--|--|--|--|--|--|--|--|-----------|--|--|--|--|--|--|--|--|--|--|--|--|--|--|--|-----------|--|--|--|--|--|--|--|--|--|--|--|--|--|--|--|-----------|--|--|--|--|--|--|--|--|--|--|--|--|--|--|--|-----------|--|--|--|--|--|--|--|--|--|--|--|--|--|--|--|-----------|--|--|--|--|--|--|--|--|--|--|--|--|--|--|--|-----------|--|--|--|--|--|--|--|--|--|--|--|--|--|--|--|-----------|--|--|--|--|--|--|--|--|--|--|--|--|--|--|--|-----------|--|--|--|--|--|--|--|--|--|--|--|--|--|--|--|-----------|--|--|--|--|--|--|--|--|--|--|--|--|--|--|--|-----------|--|--|--|--|--|--|--|--|--|--|--|--|--|--|--|-----------|--|--|--|--|--|--|--|--|--|--|--|--|--|--|--|-----------|--|--|--|--|--|--|--|--|--|--|--|--|--|--|--|-----------|--|--|--|--|--|--|--|--|--|--|--|--|--|--|--|-----------|--|--|--|--|--|--|--|--|--|--|--|--|--|--|--|-----------|--|--|--|--|--|--|--|--|--|--|--|--|--|--|--|-----------|--|--|--|--|--|--|--|--|--|--|--|--|--|--|--|-----------|--|--|--|--|--|--|--|--|--|--|--|--|--|--|--|-----------|--|--|--|--|--|--|--|--|--|--|--|--|--|--|--|-----------|--|--|--|--|--|--|--|--|--|--|--|--|--|--|--|-----------|--|--|--|--|--|--|--|--|--|--|--|--|--|--|--|-----------|--|--|--|--|--|--|--|--|--|--|--|--|--|--|--|-----------|--|--|--|--|--|--|--|--|--|--|--|--|--|--|--|-----------|--|--|--|--|--|--|--|--|--|--|--|--|--|--|--|-----------|--|--|--|--|--|--|--|--|--|--|--|--|--|--|--|-----------|--|--|--|--|--|--|--|--|--|--|--|--|--|--|--|-----------|--|--|--|--|--|--|--|--|--|--|--|--|--|--|--|-----------|--|--|--|--|--|--|--|--|--|--|--|--|--|--|--|-----------|--|--|--|--|--|--|--|--|--|--|--|--|--|--|--|-----------|--|--|--|--|--|--|--|--|--|--|--|--|--|--|--|-----------|--|--|--|--|--|--|--|--|--|--|--|--|--|--|--|-----------|--|--|--|--|--|--|--|--|--|--|--|--|--|--|--|-----------|--|--|--|--|--|--|--|--|--|--|--|--|--|--|--|-----------|--|--|--|--|--|--|--|--|--|--|--|--|--|--|--|-----------|--|--|--|--|--|--|--|--|--|--|--|--|--|--|--|-----------|--|--|--|--|--|--|--|--|--|--|--|--|--|--|--|-----------|--|--|--|--|--|--|--|--|--|--|--|--|--|--|--|-----------|--|--|--|--|--|--|--|--|--|--|--|--|--|--|--|-----------|--|--|--|--|--|--|--|--|--|--|--|--|--|--|--|-----------|--|--|--|--|--|--|--|--|--|--|--|--|--|--|--|-----------|--|--|--|--|--|--|--|--|--|--|--|--|--|--|--|-----------|--|--|--|--|--|--|--|--|--|--|--|--|--|--|--|-----------|--|--|--|--|--|--|--|--|--|--|--|--|--|--|--|-----------|--|--|--|--|--|--|--|--|--|--|--|--|--|--|--|-----------|--|--|--|--|--|--|--|--|--|--|--|--|--|--|--|-----------|--|--|--|--|--|--|--|--|--|--|--|--|--|--|--|-----------|--|--|--|--|--|--|--|--|--|--|--|--|--|--|--|-----------|--|--|--|--|--|--|--|--|--|--|--|--|--|--|--|-----------|--|--|--|--|--|--|--|--|--|--|--|--|--|--|--|-----------|--|--|--|--|--|--|--|--|--|--|--|--|--|--|--|-----------|--|--|--|--|--|--|--|--|--|--|--|--|--|--|--|-----------|--|--|--|--|--|--|--|--|--|--|--|--|--|--|--|-----------|--|--|--|--|--|--|--|--|--|--|--|--|--|--|--|-----------|--|--|--|--|--|--|--|--|--|--|--|--|--|--|--|-----------|--|--|--|--|--|--|--|--|--|--|--|--|--|--|--|-----------|--|--|--|--|--|--|--|--|--|--|--|--|--|--|--|-----------|--|--|--|--|--|--|--|--|--|--|--|--|--|--|--|-----------|--|--|--|--|--|--|--|--|--|--|--|--|--|--|--|-----------|--|--|--|--|--|--|--|--|--|--|--|--|--|--|--|-----------|--|--|--|--|--|--|--|--|--|--|--|--|--|--|--|-----------|--|--|--|--|--|--|--|--|--|--|--|--|--|--|--|-----------|--|--|--|--|--|--|--|--|--|--|--|--|--|--|--|-----------|--|--|--|--|--|--|--|--|--|--|--|--|--|--|--|-----------|--|--|--|--|--|--|--|--|--|--|--|--|--|--|--|-----------|--|--|--|--|--|--|--|--|--|--|--|--|--|--|--|-----------|--|--|--|--|--|--|--|--|--|--|--|--|--|--|--|-----------|--|--|--|--|--|--|--|--|--|--|--|--|--|--|--|-----------|--|--|--|--|--|--|--|--|--|--|--|--|--|--|--|-----------|--|--|--|--|--|--|--|--|--|--|--|--|--|--|--|-----------|--|--|--|--|--|--|--|--|--|--|--|--|--|--|--|-----------|--|--|--|--|--|--|--|--|--|--|--|--|--|--|--|-----------|--|--|--|--|--|--|--|--|--|--|--|--|--|--|--|-----------|--|--|--|--|--|--|--|--|--|--|--|--|--|--|--|-----------|--|--|--|--|--|--|--|--|--|--|--|--|--|--|--|-----------|--|--|--|--|--|--|--|--|--|--|--|--|--|--|--|-----------|--|--|--|--|--|--|--|--|--|--|--|--|--|--|--|-----------|--|--|--|--|--|--|--|--|--|--|--|--|--|--|--|-----------|--|--|--|--|--|--|--|--|--|--|--|--|--|--|--|-----------|--|--|--|--|--|--|--|--|--|--|--|--|--|--|--|-----------|--|--|--|--|--|--|--|--|--|--|--|--|--|--|--|-----------|--|--|--|--|--|--|--|--|--|--|--|--|--|--|--|-----------|--|--|--|--|--|--|--|--|--|--|--|--|--|--|--|-----------|--|--|--|--|--|--|--|--|--|--|--|--|--|--|--|-----------|--|--|--|--|--|--|--|--|--|--|--|--|--|--|--|-----------|--|--|--|--|--|--|--|--|--|--|--|--|--|--|--|-----------|--|--|--|--|--|--|--|--|--|--|--|--|--|--|--|-----------|--|--|--|--|--|--|--|--|--|--|--|--|--|--|--|-----------|--|--|--|--|--|--|--|--|--|--|--|--|--|--|--|-----------|--|--|--|--|--|--|--|--|--|--|--|--|--|--|--|-----------|--|--|--|--|--|--|--|--|--|--|--|--|--|--|--|-----------|--|--|--|--|--|--|--|--|--|--|--|--|--|--|--|-----------|--|--|--|--|--|--|--|--|--|--|--|--|--|--|--|-----------|--|--|--|--|--|--|--|--|--|--|--|--|--|--|--|-----------|--|--|--|--|--|--|--|--|--|--|--|--|--|--|--|-----------|--|--|--|--|--|--|--|--|--|--|--|--|--|--|--|-----------|--|--|--|--|--|--|--|--|--|--|--|--|--|--|--|-----------|--|--|--|--|--|--|--|--|--|--|--|--|--|--|--|-----------|--|--|--|--|--|--|--|--|--|--|--|--|--|--|--|-----------|--|--|--|--|--|--|--|--|--|--|--|--|--|--|--|-----------|--|--|--|--|--|--|--|--|--|--|--|--|--|--|--|-----------|--|--|--|--|--|--|--|--|--|--|--|--|--|--|--|-----------|--|--|--|--|--|--|--|--|--|--|--|--|--|--|--|-----------|--|--|--|--|--|--|--|--|--|--|--|--|--|--|--|-----------|--|--|--|--|--|--|--|--|--|--|--|--|--|--|--|-----------|--|--|--|--|--|--|--|--|--|--|--|--|--|--|--|-----------|--|--|--|--|--|--|--|--|--|--|--|--|--|--|--|-----------|--|--|--|--|--|--|--|--|--|--|--|--|--|--|--|-----------|--|--|--|--|--|--|--|--|--|--|--|--|--|--|--|-----------|--|--|--|--|--|--|--|--|--|--|--|--|--|--|--|-----------|--|--|--|--|--|--|--|--|--|--|--|--|--|--|--|-----------|--|--|--|--|--|--|--|--|--|--|--|--|--|--|--|-----------|--|--|--|--|--|--|--|--|--|--|--|--|--|--|--|-----------|--|--|--|--|--|--|--|--|--|--|--|--|--|--|--|-----------|--|--|--|--|--|--|--|--|--|--|--|--|--|--|--|-----------|--|--|--|--|--|--|--|--|--|--|--|--|--|--|--|-----------|--|--|--|--|--|--|--|--|--|--|--|--|--|--|--|-----------|--|--|--|--|--|--|--|--|--|--|--|--|--|--|--|-----------|--|--|--|--|--|--|--|--|--|--|--|--|--|--|--|-----------|--|--|--|--|--|--|--|--|--|--|--|--|--|--|--|-----------|--|--|--|--|--|--|--|--|--|--|--|--|--|--|--|-----------|--|--|--|--|--|--|--|--|--|--|--|--|--|--|--|-----------|--|--|--|--|--|--|--|--|--|--|--|--|--|--|--|-----------|--|--|--|--|--|--|--|--|--|--|--|--|--|--|--|-----------|--|--|--|--|--|--|--|--|--|--|--|--|--|--|--|-----------|--|--|--|--|--|--|--|--|--|--|--|--|--|--|--|-----------|--|--|--|--|--|--|--|--|--|--|--|--|--|--|--|-----------|--|--|--|--|--|--|--|--|--|--|--|--|--|--|--|-----------|--|--|--|--|--|--|--|--|--|--|--|--|--|--|--|-----------|--|--|--|--|--|--|--|--|--|--|--|--|--|--|--|-----------|--|--|--|--|--|--|--|--|--|--|--|--|--|--|--|-----------|--|--|--|--|--|--|--|--|--|--|--|--|--|--|--|-----------|--|--|--|--|--|--|--|--|--|--|--|--|--|--|--|-----------|--|--|--|--|--|--|--|--|--|--|--|--|--|--|--|-----------|--|--|--|--|--|--|--|--|--|--|--|--|--|--|--|-----------|--|--|--|--|--|--|--|--|--|--|--|--|--|--|--|-----------|--|--|--|--|--|--|--|--|--|--|--|--|--|--|--|-----------|--|--|--|--|--|--|--|--|--|--|--|--|--|--|--|-----------|--|--|--|--|--|--|--|--|--|--|--|--|--|--|--|-----------|--|--|--|--|--|--|--|--|--|--|--|--|--|--|--|-----------|--|--|--|--|--|--|--|--|--|--|--|--|--|--|--|-----------|--|--|--|--|--|--|--|--|--|--|--|--|--|--|--|-----------|--|--|--|--|--|--|--|--|--|--|--|--|--|--|--|-----------|--|--|--|--|--|--|--|--|--|--|--|--|--|--|--|-----------|--|--|--|--|--|--|--|--|--|--|--|--|--|--|--|-----------|--|--|--|--|--|--|--|--|--|--|--|--|--|--|--|-----------|--|--|--|--|--|--|--|--|--|--|--|--|--|--|--|-----------|--|--|--|--|--|--|--|--|--|--|--|--|--|--|--|-----------|--|--|--|--|--|--|--|--|--|--|--|--|--|--|--|-----------|--|--|--|--|--|--|--|--|--|--|--|--|--|--|--|-----------|--|--|--|--|--|--|--|--|--|--|--|--|--|--|--|-----------|--|--|--|--|--|--|--|--|--|--|--|--|--|--|--|-----------|--|--|--|--|--|--|--|--|--|--|--|--|--|--|--|-----------|--|--|--|--|--|--|--|--|--|--|--|--|--|--|--|-----------|--|--|--|--|--|--|--|--|--|--|--|--|--|--|--|-----------|--|--|--|--|--|--|--|--|--|--|--|--|--|--|--|-----------|--|--|--|--|--|--|--|--|--|--|--|--|--|--|--|-----------|--|--|--|--|--|--|--|--|--|--|--|--|--|--|--|-----------|--|--|--|--|--|--|--|--|--|--|--|--|--|--|--|-----------|--|--|--|--|--|--|--|--|--|--|--|--|--|--|--|-----------|--|--|--|--|--|--|--|--|--|--|--|--|--|--|--|-----------|--|--|--|--|--|--|--|--|--|--|--|--|--|--|--|-----------|--|--|--|--|--|--|--|--|--|--|--|--|--|--|--|-----------|--|--|--|--|--|--|--|--|--|--|--|--|--|--|--|-----------|--|--|--|--|--|--|--|--|--|--|--|--|--|--|--|-----------|--|--|--|--|--|--|--|--|--|--|--|--|--|--|--|-----------|--|--|--|--|--|--|--|--|--|--|--|--|--|--|--|-----------|--|--|--|--|--|--|--|--|--|--|--|--|--|--|--|-----------|--|--|--|--|--|--|--|--|--|--|--|--|--|--|--|-----------|--|--|--|--|--|--|--|--|--|--|--|--|--|--|--|-----------|--|--|--|--|--|--|--|--|--|--|--|--|--|--|--|-----------|--|--|--|--|--|--|--|--|--|--|--|--|--|--|--|-----------|--|--|--|--|--|--|--|--|--|--|--|--|--|--|--|-----------|--|--|--|--|--|--|--|--|--|--|--|--|--|--|--|-----------|--|--|--|--|--|--|--|--|--|--|--|--|--|--|--|-----------|--|--|--|--|--|--|--|--|--|--|--|--|--|--|--|-----------|--|--|--|--|--|--|--|--|--|--|--|--|--|--|--|-----------|--|--|--|--|--|--|--|--|--|--|--|--|--|--|--|-----------|--|--|--|--|--|--|--|--|--|--|--|--|--|--|--|-----------|--|--|--|--|--|--|--|--|--|--|--|--|--|--|--|-----------|--|--|--|--|--|--|--|--|--|--|--|--|--|--|--|-----------|--|--|--|--|--|--|--|--|--|--|--|--|--|--|--|-----------|--|--|--|--|--|--|--|--|--|--|--|--|--|--|--|-----------|--|--|--|--|--|--|--|--|--|--|--|--|--|--|--|-----------|--|--|--|--|--|--|--|--|--|--|--|--|--|--|--|-----------|--|--|--|--|--|--|--|--|--|--|--|--|--|--|--|-----------|--|--|--|--|--|--|--|--|--|--|--|--|--|--|--|-----------|--|--|--|--|--|--|--|--|--|--|--|--|--|--|--|-----------|--|--|--|--|--|--|--|--|--|--|--|--|--|--|--|-----------|--|--|--|--|--|--|--|--|--|--|--|--|--|--|--|-----------|--|--|--|--|--|--|--|--|--|--|--|--|--|--|--|-----------|--|--|--|--|--|--|--|--|--|--|--|--|--|--|--|-----------|--|--|--|--|--|--|--|--|--|--|--|--|--|--|--|-----------|--|--|--|--|--|--|--|--|--|--|--|--|--|--|--|-----------|--|--|--|--|--|--|--|--|--|--|--|--|--|--|--|-----------|--|--|--|--|--|--|--|--|--|--|--|--|--|--|--|-----------|--|--|--|--|--|--|--|--|--|--|--|--|--|--|--|-----------|--|--|--|--|--|--|--|--|--|--|--|--|--|--|--|-----------|--|--|--|--|--|--|--|--|--|--|--|--|--|--|--|-----------|--|--|--|--|--|--|--|--|--|--|--|--|--|--|--|-----------|--|--|--|--|--|--|--|--|--|--|--|--|--|--|--|-----------|--|--|--|--|--|--|--|--|--|--|--|--|--|--|--|-----------|--|--|--|--|--|--|--|--|--|--|--|--|--|--|--|-----------|--|--|--|--|--|--|--|--|--|--|--|--|--|--|--|-----------|--|--|--|--|--|--|--|--|--|--|--|--|--|--|--|-----------|--|--|--|--|--|--|--|--|--|--|--|--|--|--|--|-----------|--|--|--|--|--|--|--|--|--|--|--|--|--|--|--|-----------|--|--|--|--|--|--|--|--|--|--|--|--|--|--|--|-----------|--|--|--|--|--|--|--|--|--|--|--|--|--|--|--|-----------|--|--|--|--|--|--|--|--|--|--|--|--|--|--|--|-----------|--|--|--|--|--|--|--|--|--|--|--|--|--|--|--|-----------|--|--|--|--|--|--|--|--|--|--|--|--|--|--|--|-----------|--|--|--|--|--|--|--|--|--|--|--|--|--|--|--|-----------|--|--|--|--|--|--|--|--|--|--|--|--|--|--|--|-----------|--|--|--|--|--|--|--|--|--|--|--|--|--|--|--|-----------|--|--|--|--|--|--|--|--|--|--|--|--|--|--|--|-----------|--|--|--|--|--|--|--|--|--|--|--|--|--|--|--|-----------|--|--|--|--|--|--|--|--|--|--|--|--|--|--|--|-----------|--|--|--|--|--|--|--|--|--|--|--|--|--|--|--|-----------|--|--|--|--|--|--|--|--|--|--|--|--|--|--|--|-----------|--|--|--|--|--|--|--|--|--|--|--|--|--|--|--|-----------|--|--|--|--|--|--|--|--|--|--|--|--|--|--|--|-----------|--|--|--|--|--|--|--|--|--|--|--|--|--|--|--|-----------|--|--|--|--|--|--|--|--|--|--|--|--|--|--|--|-----------|--|--|--|--|--|--|--|--|--|--|--|--|--|--|--|-----------|--|--|--|--|--|--|--|--|--|--|--|--|--|--|--|-----------|--|--|--|--|--|--|--|--|--|--|--|--|--|--|--|-----------|--|--|--|--|--|--|--|--|--|--|--|--|--|--|--|-----------|--|--|--|--|--|--|--|--|--|--|--|--|--|--|--|-----------|--|--|--|--|--|--|--|--|--|--|--|--|--|--|--|-----------|--|--|--|--|--|--|--|--|--|--|--|--|--|--|--|-----------|--|--|--|--|--|--|--|--|--|--|--|--|--|--|--|-----------|--|--|--|--|--|--|--|--|--|--|--|--|--|--|--|-----------|--|--|--|--|--|--|--|--|--|--|--|--|--|--|--|-----------|--|--|--|--|--|--|--|--|--|--|--|--|--|--|--|-----------|--|--|--|--|--|--|--|--|--|--|--|--|--|--|--|-----------|--|--|--|--|--|--|--|--|--|--|--|--|--|--|--|-----------|--|--|--|--|--|--|--|--|--|--|--|--|--|--|--|-----------|--|--|--|--|--|--|--|--|--|--|--|--|--|--|--|-----------|--|--|--|--|--|--|--|--|--|--|--|--|--|--|--|-----------|--|--|--|--|--|--|--|--|--|--|--|--|--|--|--|-----------|--|--|--|--|--|--|--|--|--|--|--|--|--|--|--|-----------|--|--|--|--|--|--|--|--|--|--|--|--|--|--|--|-----------|--|--|--|--|--|--|--|--|--|--|--|--|--|--|--|-----------|--|--|--|--|--|--|--|--|--|--|--|--|--|--|--|-----------|--|--|--|--|--|--|--|--|--|--|--|--|--|--|--|-----------|--|--|--|--|--|--|--|--|--|--|--|--|--|--|--|-----------|--|--|--|--|--|--|--|--|--|--|--|--|--|--|--|-----------|--|--|--|--|--|--|--|--|--|--|--|--|--|--|--|-----------|--|--|--|--|--|--|--|--|--|--|--|--|--|--|--|-----------|--|--|--|--|--|--|--|--|--|--|--|--|--|--|--|-----------|--|--|--|--|--|--|--|--|--|--|--|--|--|--|--|-----------|--|--|--|--|--|--|--|--|--|--|--|--|--|--|--|-----------|--|--|--|--|--|--|--|--|--|--|--|--|--|--|--|-----------|--|--|--|--|--|--|--|--|--|--|--|--|--|--|--|-----------|--|--|--|--|--|--|--|--|--|--|--|--|--|--|--|-----------|--|--|--|--|--|--|--|--|--|--|--|--|--|--|--|-----------|--|--|--|--|--|--|--|--|--|--|--|--|--|--|--|-----------|--|--|--|--|--|--|--|--|--|--|--|--|--|--|--|-----------|--|--|--|--|--|--|--|--|--|--|--|--|--|--|--|-----------|--|--|--|--|--|--|--|--|--|--|--|--|--|--|--|-----------|--|--|--|--|--|--|--|--|--|--|--|--|--|--|--|-----------|--|--|--|--|--|--|--|--|--|--|--|--|--|--|--|-----------|--|--|--|--|--|--|--|--|--|--|--|--|--|--|--|-----------|--|--|--|--|--|--|--|--|--|--|--|--|--|--|--|-----------|--|--|--|--|--|--|--|--|--|--|--|--|--|--|--|-----------|--|--|--|--|--|--|--|--|--|--|--|--|--|--|--|-----------|--|--|--|--|--|--|--|--|--|--|--|--|--|--|--|-----------|--|--|--|--|--|--|--|--|--|--|--|--|--|--|--|-----------|--|--|--|--|--|--|--|--|--|--|--|--|--|--|--|-----------|--|--|--|--|--|--|--|--|--|--|--|--|--|--|--|-----------|--|--|--|--|--|--|--|--|--|--|--|--|--|--|--|-----------|--|--|--|--|--|--|--|--|--|--|--|--|--|--|--|-----------|--|--|--|--|--|--|--|--|--|--|--|--|--|--|--|-----------|--|--|--|--|--|--|--|--|--|--|--|--|--|--|--|-----------|--|--|--|--|--|--|--|--|--|--|--|--|--|--|--|-----------|--|--|--|--|--|--|--|--|--|--|--|--|--|--|--|-----------|--|--|--|--|--|--|--|--|--|--|--|--|--|--|--|-----------|--|--|--|--|--|--|--|--|--|--|--|--|--|--|--|-----------|--|--|--|--|--|--|--|--|--|--|--|--|--|--|--|--|--|--|--|--|--|--|--|--|--|--|--|--|--|--|--|

Measurement results: T vs HAB, for  $v = 8.84 \text{ cm/s}$

| $\varphi = 1.8$ |              | $\varphi = 2.0$ |              |
|-----------------|--------------|-----------------|--------------|
| <u>HAB (mm)</u> | <u>T (K)</u> | <u>HAB (mm)</u> | <u>T (K)</u> |
| 4               | 1786.33      | 4               | 1782         |
| 6               | 1769.32      | 6               | 1774.6       |
| 8               | 1765.9       | 8               | 1776.48      |
| 10              | 1737.4       | 10              | 1749         |
| 12              | 1750         | 12              | 1715         |
| 14              | 1739.17      | 14              | 1718.52      |
| 16              | 1723.55      | 16              | 1708.57      |
| 18              | 1728.26      | 18              | 1700         |
| 20              | 1708.39      |                 |              |

Calculated results: T vs HAB, for v = 8.84 cm/s

| φ = 1.8  |        |            |        |                           |        | φ = 2.0 |          |            |           |                           |          |        |
|----------|--------|------------|--------|---------------------------|--------|---------|----------|------------|-----------|---------------------------|----------|--------|
| Adiab    |        | w. gas rad |        | w. gas & soot (Leung) rad |        | Adiab   |          | w. gas rad |           | w. gas & soot (Leung) rad |          |        |
| HAB (mm) | T (K)  | HAB (mm)   | T (K)  | T (K)                     | 0      | 300     | 0        | 300        | 0         | 300                       |          |        |
| 0.015578 | 322.76 | 0.015425   | 321.96 | 0.016127                  | 322.94 |         | 0.018142 | 320.9      | 0.017324  | 319.37                    | 0.018432 | 320.59 |
| 0.031256 | 345.54 | 0.030922   | 343.93 | 0.032311                  | 345.88 |         | 0.036149 | 341.82     | 0.035513  | 338.8                     | 0.036718 | 341.23 |
| 0.047087 | 368.46 | 0.046528   | 366.01 | 0.048576                  | 368.87 |         | 0.053922 | 362.63     | 0.051553  | 358.17                    | 0.054768 | 361.83 |
| 0.063046 | 391.49 | 0.062028   | 389.15 | 0.064882                  | 391.88 |         | 0.071446 | 383.11     | 0.068731  | 377.41                    | 0.072535 | 382.26 |
| 0.079098 | 414.62 | 0.077905   | 410.3  | 0.081153                  | 414.83 |         | 0.088711 | 401.84     | 0.0845793 | 396.56                    | 0.090074 | 402.59 |
| 0.095193 | 437.78 | 0.093475   | 432.27 | 0.097322                  | 437.51 |         | 0.10572  | 424.21     | 0.101008  | 415.58                    | 0.107074 | 422.88 |
| 0.1112   | 460.82 | 0.108979   | 453.88 | 0.11301                   | 459.78 |         | 0.12248  | 444.43     | 0.11715   | 434.52                    | 0.12437  | 442.91 |
| 0.12697  | 483.51 | 0.123891   | 475.11 | 0.12849                   | 481.66 |         | 0.139    | 464.51     | 0.13303   | 453.37                    | 0.1419   | 462.93 |
| 0.14242  | 505.77 | 0.13855    | 495.97 | 0.14369                   | 503.16 |         | 0.15538  | 484.44     | 0.148     | 472.12                    | 0.1578   | 482.86 |
| 0.15756  | 527.61 | 0.15301    | 516.47 | 0.1586                    | 524.31 |         | 0.17132  | 504.2      | 0.16416   | 490.74                    | 0.17418  | 502.7  |
| 0.17242  | 549.08 | 0.16722    | 536.65 | 0.17326                   | 545.15 |         | 0.1871   | 523.79     | 0.1794    | 509.22                    | 0.19302  | 522.32 |
| 0.18705  | 570.26 | 0.18121    | 556.57 | 0.18771                   | 565.73 |         | 0.20266  | 543.21     | 0.19442   | 527.59                    | 0.2062   | 541.57 |
| 0.20147  | 591.18 | 0.195      | 576.25 | 0.20195                   | 586.08 |         | 0.21798  | 562.48     | 0.20925   | 549.8                     | 0.2216   | 561.86 |
| 0.2157   | 611.87 | 0.20862    | 595.74 | 0.21601                   | 606.21 |         | 0.23308  | 581.6      | 0.2246    | 569.39                    | 0.2376   | 582.78 |
| 0.22975  | 632.36 | 0.22208    | 615.05 | 0.2299                    | 626.17 |         | 0.24801  | 600.61     | 0.23837   | 582.03                    | 0.25249  | 599.48 |
| 0.24359  | 652.6  | 0.23537    | 634.18 | 0.2436                    | 645.92 |         | 0.26278  | 619.53     | 0.25266   | 598.98                    | 0.26755  | 618.49 |
| 0.2572   | 672.57 | 0.24848    | 653.11 | 0.25709                   | 665.43 |         | 0.27738  | 638.35     | 0.26679   | 617.83                    | 0.28243  | 637.42 |
| 0.2706   | 692.27 | 0.26139    | 671.81 | 0.27036                   | 684.68 |         | 0.29176  | 657.22     | 0.28005   | 636.58                    | 0.2976   | 657.41 |
| 0.28379  | 711.73 | 0.27411    | 690.27 | 0.28341                   | 703.68 |         | 0.30591  | 675.49     | 0.2945    | 635.18                    | 0.31153  | 674.78 |
| 0.2968   | 730.98 | 0.28664    | 708.54 | 0.29629                   | 722.48 |         | 0.31983  | 693.75     | 0.30806   | 650.64                    | 0.32573  | 693.2  |
| 0.30965  | 750.05 | 0.29901    | 726.62 | 0.30902                   | 741.13 |         | 0.33352  | 711.86     | 0.32144   | 677.96                    | 0.33974  | 711.47 |
| 0.32236  | 768.98 | 0.31124    | 744.56 | 0.32162                   | 759.66 |         | 0.34706  | 729.82     | 0.33462   | 704.15                    | 0.35355  | 729.68 |
| 0.33497  | 787.8  | 0.32336    | 762.39 | 0.33411                   | 778.08 |         | 0.36042  | 747.82     | 0.34732   | 722.17                    | 0.3694   | 747.64 |
| 0.34748  | 806.54 | 0.33537    | 780.1  | 0.34649                   | 796.4  |         | 0.37366  | 765.43     | 0.36047   | 739.1                     | 0.38074  | 765.59 |
| 0.35993  | 825.24 | 0.34728    | 797.73 | 0.3588                    | 814.66 |         | 0.38678  | 783.14     | 0.37319   | 755.94                    | 0.39411  | 783.45 |
| 0.37231  | 843.89 | 0.35911    | 815.31 | 0.37103                   | 832.88 |         | 0.39979  | 800.79     | 0.38577   | 772.7                     | 0.40735  | 801.21 |
| 0.38462  | 862.49 | 0.37089    | 832.91 | 0.38316                   | 851.05 |         | 0.41271  | 818.93     | 0.39733   | 789.38                    | 0.4203   | 818.97 |
| 0.39688  | 881.06 | 0.3826     | 850.34 | 0.39531                   | 869.18 |         | 0.42553  | 835.95     | 0.40859   | 806.01                    | 0.43355  | 836.69 |
| 0.40911  | 899.63 | 0.39426    | 867.8  | 0.40736                   | 887.29 |         | 0.43827  | 853.48     | 0.42288   | 822.62                    | 0.44653  | 854.38 |
| 0.42133  | 918.22 | 0.40588    | 885.26 | 0.41939                   | 905.4  |         | 0.45094  | 871.41     | 0.4351    | 839.22                    | 0.45943  | 872.06 |
| 0.43356  | 936.87 | 0.41747    | 902.71 | 0.43142                   | 923.55 |         | 0.46355  | 888.4      | 0.44274   | 852.75                    | 0.47229  | 889.51 |
| 0.44581  | 955.61 | 0.42906    | 920.19 | 0.44346                   | 941.77 |         | 0.47613  | 905.5      | 0.45002   | 869.3                     | 0.4851   | 907.48 |
| 0.45818  | 974.5  | 0.44065    | 937.72 | 0.45555                   | 960.1  |         | 0.48863  | 923.53     | 0.45713   | 888.91                    | 0.49791  | 925.24 |
| 0.47062  | 993.55 | 0.45228    | 955.34 | 0.46775                   | 978.6  |         | 0.50115  | 941.11     | 0.48335   | 905.5                     | 0.51069  | 945.05 |
| 0.48311  | 1012.7 | 0.46398    | 973.09 | 0.48004                   | 997.27 |         | 0.51369  | 958.78     | 0.49532   | 922.11                    | 0.52349  | 960.95 |
| 0.49553  | 1031.7 | 0.47577    | 990.99 | 0.49237                   | 1016   |         | 0.52627  | 976.55     | 0.50729   | 938.78                    | 0.53678  | 980.78 |
| 0.50781  | 1050.5 | 0.48761    | 1009   | 0.50464                   | 1034.6 |         | 0.53892  | 994.6      | 0.51985   | 959.5                     | 0.5499   | 997.18 |
| 0.51993  | 1069   | 0.49945    | 1027   | 0.51676                   | 1053   |         | 0.55167  | 1012.5     | 0.53125   | 972.31                    | 0.56234  | 1015.5 |
| 0.53192  | 1087.2 | 0.51119    | 1044.8 | 0.52872                   | 1071.2 |         | 0.56452  | 1030.5     | 0.54333   | 989.24                    | 0.57549  | 1035.4 |
| 0.54378  | 1105.2 | 0.52279    | 1062.4 | 0.54055                   | 1089   |         | 0.57747  | 1049.2     | 0.55543   | 1006.3                    | 0.58873  | 1058.2 |
| 0.55554  | 1123   | 0.53425    | 1080.7 | 0.55232                   | 1107.6 |         | 0.59024  | 1067.9     | 0.56736   | 1024.7                    | 0.60197  | 1080.8 |
| 0.56716  | 1140.4 | 0.5456     | 1096.9 | 0.56386                   | 1124   |         | 0.60321  | 1085.5     | 0.57997   | 1040.9                    | 0.61498  | 1098.7 |
| 0.57853  | 1157.4 | 0.55684    | 1113.7 | 0.57531                   | 1141.1 |         | 0.61584  | 1103.5     | 0.59239   | 1058.4                    | 0.62786  | 1107.8 |
| 0.58955  | 1173.7 | 0.56798    | 1130.4 | 0.5865                    | 1157.7 |         | 0.62832  | 1121.1     | 0.60475   | 1075.8                    | 0.64058  | 1125.6 |
| 0.60021  | 1189.4 | 0.57899    | 1146.8 | 0.59737                   | 1173.7 |         | 0.64068  | 1138.5     | 0.61695   | 1093.9                    | 0.65317  | 1144.1 |
| 0.61053  | 1204.4 | 0.58987    | 1162.7 | 0.60789                   | 1189   |         | 0.65292  | 1155.2     | 0.62904   | 1112.5                    | 0.66578  | 1161.9 |
| 0.62056  | 1218.9 | 0.60014    | 1178   | 0.61807                   | 1203.8 |         | 0.6651   | 1172.4     | 0.64091   | 1126.6                    | 0.67802  | 1179.7 |
| 0.63032  | 1232.8 | 0.61022    | 1192.6 | 0.62797                   | 1218   |         | 0.67711  | 1189.5     | 0.65227   | 1143                      | 0.69019  | 1199.9 |
| 0.63984  | 1246.3 | 0.61999    | 1206.8 | 0.6376                    | 1231.7 |         | 0.68883  | 1209.4     | 0.66438   | 1159.1                    | 0.70204  | 1209.9 |
| 0.64915  | 1259.3 | 0.6295     | 1220.4 | 0.647                     | 1244.9 |         | 0.70019  | 1220.2     | 0.67686   | 1176.7                    | 0.71398  | 1220.9 |
| 0.65826  | 1271.9 | 0.63877    | 1233.5 | 0.65618                   | 1257.6 |         | 0.71118  | 1234.8     | 0.68744   | 1195.9                    | 0.7256   | 1232.8 |
| 0.66722  | 1284.1 | 0.64783    | 1246.2 | 0.66518                   | 1270   |         | 0.72183  | 1248.8     | 0.69869   | 1205.9                    | 0.73728  | 1253.8 |
| 0.67603  | 1296   | 0.65669    | 1258.5 | 0.67401                   | 1282   |         | 0.73219  | 1262.3     | 0.70951   | 1220.5                    | 0.74752  | 1267.2 |
| 0.6847   | 1307.5 | 0.66538    | 1270.5 | 0.6827                    | 1293.6 |         | 0.74228  | 1275.3     | 0.72071   | 1234.5                    | 0.75759  | 1280.8 |
| 0.69326  | 1318.7 | 0.67391    | 1282.1 | 0.69126                   | 1305   |         | 0.75213  | 1287.5     | 0.7318    | 1248.9                    | 0.76759  | 1294.8 |
| 0.70173  | 1329.7 | 0.68232    | 1293.9 | 0.69971                   | 1316   |         | 0.76177  | 1299.8     | 0.74202   | 1260.7                    | 0.77755  | 1304.6 |
| 0.71013  | 1340.4 | 0.69061    | 1304.3 | 0.70806                   | 1326.7 |         | 0.77123  | 1311.5     | 0.74996   | 1273.1                    | 0.78751  | 1316.2 |
| 0.71847  | 1350.8 | 0.69879    | 1315   | 0.71634                   | 1337.2 |         | 0.78054  | 1322.7     | 0.75944   | 1285.1                    | 0.79455  | 1327.5 |
| 0.72677  | 1361   | 0.70688    | 1325.4 | 0.72455                   | 1347.5 |         | 0.78972  | 1332.8     | 0.76873   | 1296.7                    | 0.80038  | 1338.3 |
| 0.73504  | 1371.1 | 0.7148     | 1335.6 | 0.73272                   | 1357.5 |         | 0.79894  | 1343.2     | 0.77804   | 1308.3                    | 0.80823  | 1349.3 |
| 0.74329  | 1380.9 | 0.72285    | 1345.6 | 0.74086                   | 1367.4 |         | 0.80777  | 1354.3     | 0.78683   | 1319.7                    | 0.82003  | 1359.2 |
| 0.75154  | 1390.6 | 0.73076    | 1355.3 | 0.74898                   | 1377   |         | 0.81667  | 1364.8     | 0.79568   | 1329.3                    | 0.83105  | 1369.5 |
| 0.75981  | 1400.1 | 0.73863    | 1364.9 | 0.7571                    | 1386.5 |         | 0.82552  | 1374.7     | 0.80401   | 1339.5                    | 0.84003  | 1379.1 |
| 0.76812  | 1409.5 | 0.74648    | 1374.3 | 0.76522                   | 1395.9 |         | 0.83434  | 1384.7     | 0.81259   | 1349.8                    | 0.84893  | 1388.8 |
| 0.77648  | 1418.7 | 0.75432    | 1383.5 | 0.77331                   | 1405.1 |         | 0.84313  | 1393.7     | 0.82139   | 1359.2                    | 0.85794  | 1398.2 |
| 0.7849   | 1427.9 | 0.76216    | 1392.6 | 0.78156                   | 1414.1 |         | 0.85192  | 1403       | 0.83007   | 1367.9                    | 0.8669   | 1407.4 |
| 0.79341  | 1436.9 | 0.77003    | 1401.5 | 0.7898                    | 1423.1 |         | 0.86072  | 1412       | 0.8385    | 1377.9                    | 0.8759   | 1416.5 |
| 0.80201  | 1445.9 | 0.77793    | 1410.3 | 0.79812                   | 1431.9 |         | 0.86954  | 1420.9     | 0.84691   | 1387                      | 0.88495  | 1425.5 |
| 0.81073  | 1454.7 | 0.78589    | 1419   | 0.80654                   | 1440.7 |         | 0.87836  | 1429.7     | 0.85509   | 1396.9                    | 0.89402  | 1434.7 |
| 0.81957  | 1463.5 | 0.7939     | 1427.7 | 0.81505                   | 1449.4 |         | 0.88736  | 1438       | 0.86372   | 1404.6                    | 0.90322  | 1444.5 |
| 0.82855  | 1472.3 | 0.80199    | 1436.2 | 0.82368                   | 1458   |         | 0.89638  | 1446.9     | 0.87215   | 1413.2                    | 0.91249  | 1455.1 |
| 0.83769  | 1480.9 | 0.81016    | 1444.6 | 0.83244                   | 1466.6 |         | 0.90549  | 1455.3     | 0.8806    | 1421.6                    | 0.92185  | 1465.9 |
| 0.84702  | 1489.6 | 0.81844    | 1453   | 0.84135                   | 1475   |         | 0.91468  | 1463.5     | 0.88908   | 1430.5                    | 0.93133  | 1476.9 |
| 0.85654  | 1498.2 | 0.82682    | 1461.3 | 0.85042                   | 1483.5 |         | 0.92347  | 1471.8     | 0.89748   | 1439.1                    | 0.94095  | 1487.6 |
| 0.8663   | 1506.7 | 0.83534    | 1469.5 | 0.85968                   | 1491.9 |         | 0.93242  | 1479.8     | 0.90626   | 1446.2                    | 0.95072  | 1498.6 |
| 0.87631  | 1515.3 | 0.84399    | 1477.7 | 0.86914                   | 1500.2 |         | 0.94229  | 1487.9     | 0.91549   | 1454.1                    | 0.96065  | 1509.2 |
| 0.88663  | 1523.8 | 0.8528     | 1485.8 | 0.87883                   | 1508.6 |         | 0.95275  | 1496.5     | 0.92377   | 1462.4                    | 0.97076  | 1520.6 |
| 0.89729  | 1532.4 | 0.86179    | 1493.9 | 0.88878                   | 1516.9 |         | 0.96271  | 1505.2     | 0.93238   | 1469.8                    | 0.98085  | 1531.9 |
| 0.90834  | 1541   | 0.8709     | 1502   | 0.89894                   | 1525.2 |         | 0.97288  | 1513.4     | 0.94169   | 1477.5                    | 0.99168  | 1543.6 |
| 0.91983  | 1549.6 | 0.88038    | 1510   | 0.90963                   | 1533.5 |         | 0.98328  | 1519.2     | 0.95083   | 1485.1                    | 1.0025   | 1552.4 |
| 0.93181  | 1558.3 | 0.89004    | 1518.1 | 0.92062                   | 1541.9 |         | 0.99395  | 1526.9     | 0.96011   | 1492.6                    | 1.0137   | 1551.9 |
| 0.94438  | 1567.1 | 0.89998    | 1526.1 | 0.93204                   | 1550.3 |         | 1.0049   | 1534.5     | 0.96956   | 1500.5                    | 1.0252   | 1559.7 |
| 0.95761  | 1576   | 0.91025    | 1534.2 | 0.94397                   | 1558.8 |         | 1.0158   | 1542.2     | 0.9789    | 1508.7                    | 1.037    | 1568.7 |
| 0.97161  | 1585   | 0.92089    | 1542.3 | 0.95648                   | 1567.3 |         | 1.0279   | 1549.8     | 0.98901   | 1514.8                    | 1.0494   | 1555.1 |
| 0.9865   | 1594.2 | 0.93       |        |                           |        |         |          |            |           |                           |          |        |

Measurement results: T vs v, at HAB 5 mm

| $\varphi = 2.0$ |              | $\varphi = 2.1$ |              |
|-----------------|--------------|-----------------|--------------|
| <u>v (cm/s)</u> | <u>T (K)</u> | <u>v (cm/s)</u> | <u>T (K)</u> |
| 5.31            | 1649.89      | 5.31            | 1629.25      |
| 5.89            | 1651.41      | 5.89            | 1672.7       |
| 6.48            | 1714.14      | 6.48            | 1750.58      |
| 7.07            | 1737         | 7.07            | 1743.87      |
| 7.66            | 1744.77      | 7.66            | 1760.13      |
| 8.25            | 1764.43      | 8.25            | 1766.11      |
| 8.84            | 1771         | 8.84            | 1837.48      |
| 9.43            | 1782.55      | 9.43            | 1823.66      |
| 10.02           | 1826.48      | 10.02           | 1774.02      |
| 10.61           | 1829         | 10.61           | 1818.98      |
| 11.2            | 1830.3       | 11.2            | 1858         |
| 11.79           | 1843.51      | 11.79           | 1868.02      |
| 12.38           | 1855.05      | 12.38           | 1842.56      |
| 12.97           | 1869.02      | 12.97           | 1871.79      |
| 13.56           | 1866.35      |                 |              |

Calculated results: T vs v, at HAB 5 mm

| v (cm/s) | $\varphi = 2.0$ |              |             |
|----------|-----------------|--------------|-------------|
|          | fv              |              |             |
|          | No rad.         | Leung + rad. | Liu + rad.  |
| 5.470787 | 1684.277258     | 1638.440718  | 1642.381897 |
| 6.070874 | 1707.002308     | 1664.713867  | 1668.35735  |
| 6.669828 | 1727.498331     | 1688.398037  | 1691.89364  |
| 7.26768  | 1746.088071     | 1709.956139  | 1713.196528 |
| 7.864448 | 1763.261757     | 1729.659414  | 1732.635195 |
| 8.46014  | 1778.732609     | 1747.645418  | 1750.432052 |
| 9.054754 | 1793.177643     | 1764.135364  | 1766.838979 |
| 9.64828  | 1806.669086     | 1779.477808  | 1781.973016 |
| 10.2407  | 1819.318323     | 1793.732474  | 1796.162392 |
| 10.83196 | 1831.211897     | 1807.057892  | 1809.344282 |
| 11.42204 | 1842.476967     | 1819.624486  | 1821.781254 |
| 12.01085 | 1853.180789     | 1831.515744  | 1833.543247 |
| 12.5983  | 1863.396906     | 1842.807178  | 1844.721802 |
| 13.18427 | 1873.185506     | 1853.567708  | 1855.372042 |
| 13.76856 | 1882.603073     | 1863.850439  | 1865.55847  |

| v (cm/s) | $\varphi = 2.1$ |              |             |
|----------|-----------------|--------------|-------------|
|          | fv              |              |             |
|          | No rad.         | Leung + rad. | Liu + rad.  |
| 5.466334 | 1671.234704     | 1626.145203  | 1630.735101 |
| 6.067097 | 1693.877755     | 1652.052103  | 1656.501671 |
| 6.66683  | 1714.413852     | 1675.726962  | 1679.910767 |
| 7.265557 | 1733.168397     | 1697.22477   | 1701.256565 |
| 7.863289 | 1750.307274     | 1716.93275   | 1720.675671 |
| 8.460038 | 1766.169327     | 1735.014641  | 1738.550349 |
| 9.055813 | 1780.717106     | 1751.706007  | 1755.077938 |
| 9.650615 | 1794.361021     | 1767.187703  | 1770.264588 |
| 10.24444 | 1806.997285     | 1781.488985  | 1784.522041 |
| 10.83726 | 1818.925072     | 1794.871621  | 1797.703926 |
| 11.42907 | 1830.211573     | 1807.487223  | 1810.172784 |
| 12.01984 | 1840.922709     | 1819.334759  | 1821.968127 |
| 12.60951 | 1851.119833     | 1830.605911  | 1833.151142 |
| 13.19802 | 1860.87543      | 1841.361614  | 1843.755043 |
| 13.7853  | 1870.233249     | 1851.623231  | 1853.889521 |
